# Supplementary material for: Translational repression of NMD targets by GIGYF2 and EIF4E2
Source: PubMed Central journal article supplement (PMC8555832; doi:10.1371/journal.pgen.1009813), 2021-10-19

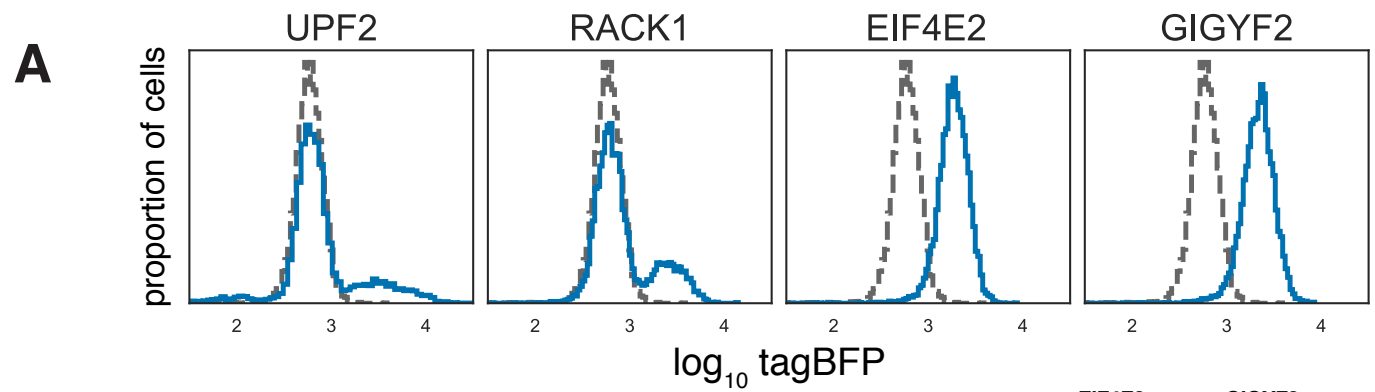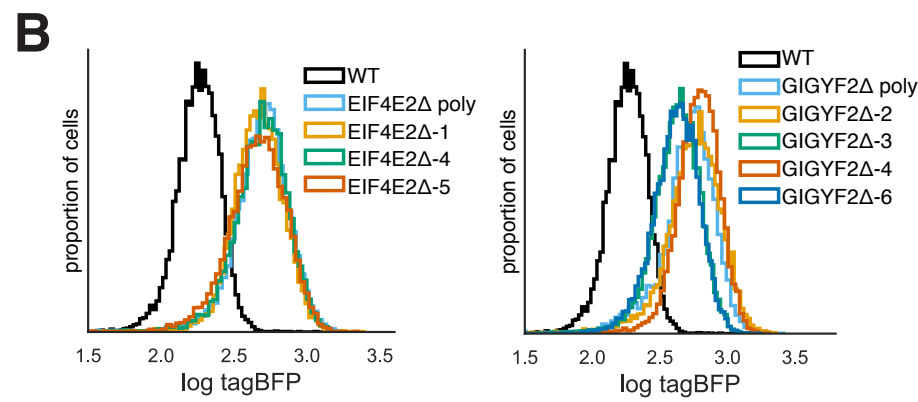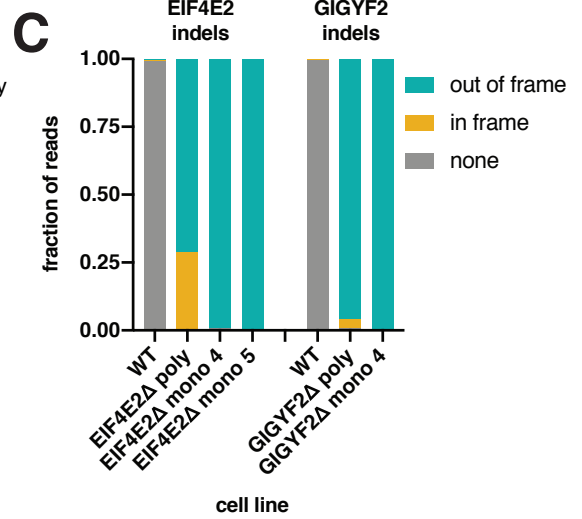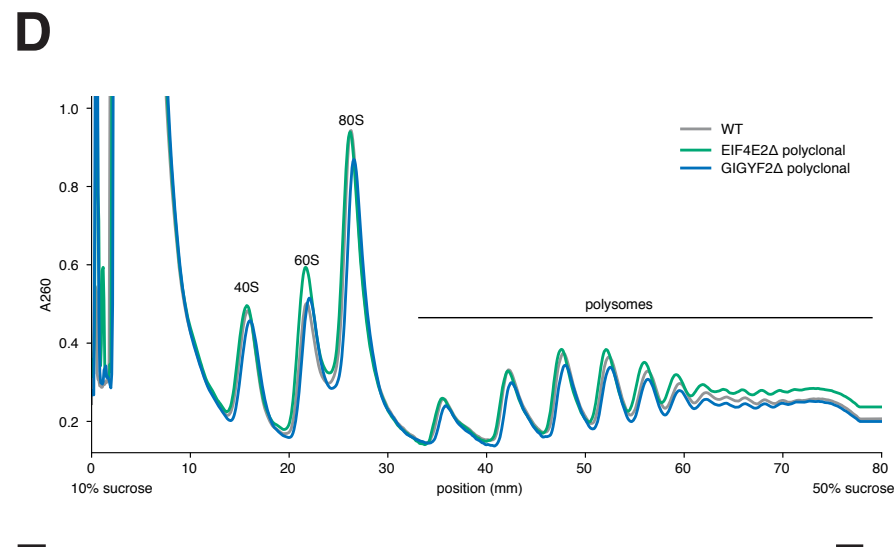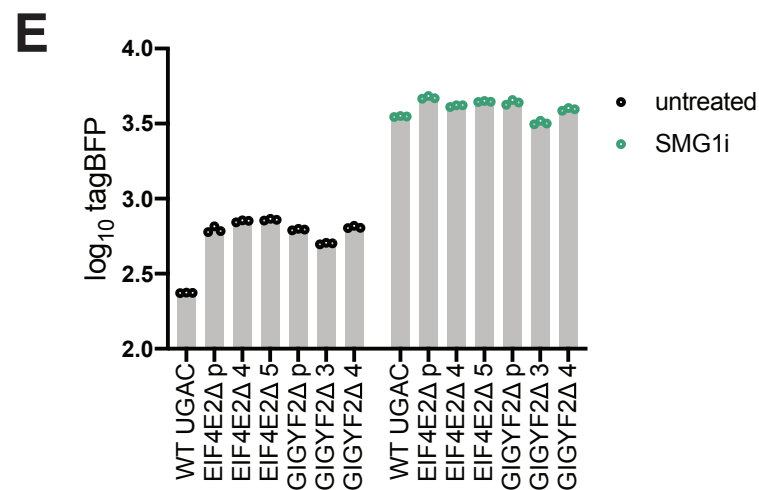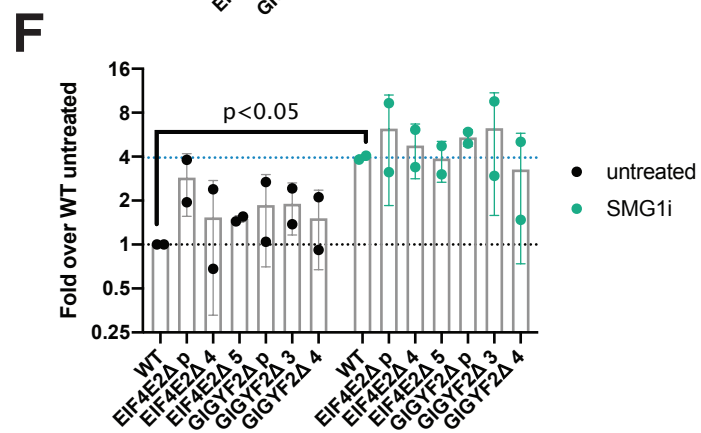

Supplement: pgen.1009813.s006.pdf [file pgen.1009813.s006.pdf]
