# Supplementary material for: Translational repression of NMD targets by GIGYF2 and EIF4E2
Source: PLoS Genet. 2021 Oct 19;17(10):e1009813. doi: 10.1371/journal.pgen.1009813 (PMC8555832; doi:10.1371/journal.pgen.1009813)
Supplement: S14 Table — Immunoaffinity purification/mass spectrometry analyses of StrepII-GIGYF2 from untreated, RNase A and SSA treated HEK293T cells. Label free quantification (LFQ) intensities along with the average fold changes and statistical significance are reported. Searched with Andromeda and analyzed with Maxquant (1.6.7.0) and Perseus (1.6.7.0). (XLSX) [file pgen.1009813.s022.xlsx]

## Sheet: Sheet1
id	Gene names	Protein names	Majority protein IDs	Protein IDs	Pfam	Peptides	Razor + unique peptides	Unique peptides	Sequence coverage [%]	Unique + razor sequence coverage [%]	Unique sequence coverage [%]	Mol. weight [kDa]	Q-value	Score	Intensity	iBAQ peptides	MS/MS count	N: log2(LFQ intensity beads-1)	N: log2(LFQ intensity beads-2)	N: log2(LFQ intensity beads-3)	N: log2(LFQ intensity GIGYF2-EIF4E2-1)	N: log2(LFQ intensity GIGYF2-EIF4E2-2)	N: log2(LFQ intensity GIGYF2-EIF4E2-3)	N: log2(LFQ intensity GIGYF2-EIF4E2-RNaseA-1)	N: log2(LFQ intensity GIGYF2-EIF4E2-RNaseA-2)	N: log2(LFQ intensity GIGYF2-EIF4E2-RNaseA-3)	N: log2(LFQ intensity GIGYF2-EIF4E2-SSA-1)	N: log2(LFQ intensity GIGYF2-EIF4E2-SSA-2)	N: log2(LFQ intensity GIGYF2-EIF4E2-SSA-3)	log2(GIGYF2-EIF4E2/beads)	N: -log10 padj	log2(GIGYF2-EIF4E2-RNaseA/beads)	N: -log10 padj	log2(GIGYF2-EIF4E2-SSA/beads)	N: -log10 padj	log2(GIGYF2-EIF4E2-RNaseA/GIGYF2-EIF4E2)	N: -log10 padj	log2(GIGYF2-EIF4E2-SSA/GIGYF2-EIF4E2)	N: -log10 padj	log2(GIGYF2-EIF4E2-SSA/GIGYF2-EIF4E2-RNaseA)	N: -log10 padj
2	RPL17;RPL17-C18orf32	60S ribosomal protein L17	P18621;A0A0A6YYL6	P18621;A0A0A6YYL6	Ribosomal_L22	9	9	9	45.7	45.7	45.7	21.397	0	113.48	12050000000	9	247	17.145	16.2301	18.1032	25.9174	25.9526	25.4111	26.0395	26.0779	26.2237	25.9473	26.2092	25.314	8.6009	2.72393	8.95425	2.47592	8.66402	3.06983	0.353344	0.763585	0.0631218	0.0686288	-0.290222	0.409767
4	PWP2	Periodic tryptophan protein 2 homolog	Q15269;A0A0B4J2E5	Q15269;A0A0B4J2E5	Utp12;WD40	9	9	9	10	10	10	102.45	0	21.006	85962000	39	42	16.1434	16.5589	17.4983	18.0896	18.2692	15.6535	18.4671	18.2089	18.3134	18.321	18.155	18.2024	0.603922	0.247177	1.59625	1.27367	1.49263	1.20022	0.992333	0.44321	0.888703	0.395102	-0.103629	0.492273
5	RAD50	DNA repair protein RAD50	Q92878;A0A1W2PQ90	Q92878;A0A1W2PQ90	Rad50_zn_hook	8	8	8	5.6	5.6	5.6	153.89	0	20.114	37192000	73	17	16.5641	16.5604	16.9878	18.1727	17.9134	16.8531	16.3855	15.7394	16.3483	18.6691	18.4689	17.8083	0.942265	0.875387	0	NaN	1.61131	1.94849	-1.48868	1.33198	0.669042	0.606771	2.15772	2.46372
13	CNOT1	CCR4-NOT transcription complex subunit 1	A5YKK6	A5YKK6	DUF3819;Not1	21	21	21	9.1	9.1	9.1	266.94	0	72.543	281820000	122	76	16.2725	17.137	16.0296	18.6232	19.0143	18.3166	20.4727	19.2651	19.4278	18.3029	18.4435	17.9705	2.17167	2.03903	3.24214	2.49539	1.75925	1.65989	1.07047	1.06287	-0.412414	0.75114	-1.48289	1.33825
19	SNRPG;SNRPGP15	Small nuclear ribonucleoprotein G;Putative small nuclear ribonucleoprotein G-like protein 15	P62308;A8MWD9	P62308;A8MWD9	LSM	3	3	3	26.3	26.3	26.3	8.496	0	11.716	103850000	3	44	17.2257	16.7548	17.6035	18.6173	19.0551	18.1647	19.2403	19.202	18.4474	16.3847	15.4972	19.2801	1.41768	1.78635	1.76856	2.11173	-0.140639	0.0388888	0.350876	0.408933	-1.55832	0.516837	-1.9092	0.632555
21	EEF1E1;EEF1E1-BLOC1S5	Eukaryotic translation elongation factor 1 epsilon-1	O43324;C9J1V9	O43324;C9J1V9	GST_C_3	2	2	2	12.6	12.6	12.6	19.81	0	11.261	90693000	12	18	16.202	16.3893	17.7662	19.0066	19.1642	18.782	16.3304	18.9961	19.2249	19.0609	19.1069	19.3105	2.19843	1.38589	1.39798	0.561214	2.37363	1.42248	-0.800444	0.318532	0.175197	0.566089	0.975641	0.393754
81	NACA	Nascent polypeptide-associated complex subunit alpha, muscle-specific form	E9PAV3	E9PAV3	NAC	3	3	3	2	2	2	205.42	0	133.62	403640000	106	61	15.9046	17.1774	16.2303	21.1113	21.3605	20.703	20.9984	20.522	20.7356	20.3519	20.039	21.3313	4.62086	2.73817	4.31457	2.4261	4.13661	2.79022	-0.306292	0.567563	-0.484248	0.45864	-0.177956	0.154311
86	RPS17	40S ribosomal protein S17	P08708;H3BNC9	P08708;H3BNC9;A0A0J9YYC4	Ribosomal_S17e	7	7	7	40	40	40	15.55	0	57.352	5838700000	5	222	16.6555	16.9944	16.5019	25.4697	25.169	24.6745	24.7131	25.1808	25.1268	24.3848	24.0474	24.1632	8.38712	4.50937	8.28962	5.63013	7.4812	5.17864	-0.0974973	0.128584	-0.905918	1.36044	-0.808421	1.84671
87	HNRNPUL2;HNRNPUL2-BSCL2	Heterogeneous nuclear ribonucleoprotein U-like protein 2	Q1KMD3;H3BQZ7	Q1KMD3;H3BQZ7	SAP;SPRY	7	7	7	9.9	9.9	9.9	85.104	0	29.789	63213000	36	30	16.6999	17.0406	16.8065	17.9601	17.8959	18.8031	16.5251	17.9736	17.2804	18.2214	18.3016	17.9507	1.37065	1.49856	0.410674	0.365072	1.30888	3.05855	-0.959972	0.849317	-0.0617657	0.0667786	0.898206	0.800857
88	RPL36A-HNRNPH2;RPL36A;RPL36AL	60S ribosomal protein L36a;60S ribosomal protein L36a-like	H7BZ11;P83881;Q969Q0	H7BZ11;P83881;Q969Q0	Ribosomal_L44	5	5	5	35.6	35.6	35.6	13.792	0	18.553	11946000000	5	90	16.826	17.6818	16.2574	26.4098	27.0402	28.4705	23.4044	26.9745	25.6635	27.3522	27.8283	26.1985	10.3851	3.49617	8.42576	2.11185	10.2046	3.98272	-1.95933	0.705816	-0.180484	0.0816779	1.77884	0.647794
91	KIF2A	Kinesin-like protein KIF2A	O00139	O00139;Q99661;Q8N4N8	Kinesin	9	9	9	12.6	12.6	12.6	79.954	0	21.946	90309000	35	33	16.6283	16.765	16.2151	19.4744	19.3261	18.7696	16.8106	16.6299	18.5283	18.7545	18.8901	18.7655	2.65393	3.08323	0.78684	0.491968	2.26725	2.47626	-1.86709	1.11063	-0.386677	0.678272	1.48041	0.874642
93	AP3B1	AP-3 complex subunit beta-1	O00203	O00203;Q13367	Adaptin_N;AP3B1_C;SEEEED	8	8	8	7.9	7.9	7.9	121.32	0	18.876	99936000	55	29	17.341	16.7199	15.778	18.9966	19.1703	18.7129	16.8644	15.5579	17.3629	18.4746	18.5454	18.8285	2.34695	1.559	0	NaN	2.00318	1.38232	-2.36485	1.38405	-0.34377	0.92542	2.02108	1.2289
97	EIF3F	Eukaryotic translation initiation factor 3 subunit F	O00303	O00303	JAB;MitMem_reg	7	7	7	24.1	24.1	24.1	37.563	0	140.84	1563000000	15	161	15.6727	16.3945	16.0347	21.6903	21.697	20.9753	22.5039	22.5932	22.8438	21.4968	21.5265	22.014	5.42026	4.10363	6.613	3.9197	5.64514	4.37485	1.19274	1.61207	0.22488	0.31044	-0.967864	1.89535
101	IGF2BP3	Insulin-like growth factor 2 mRNA-binding protein 3	O00425	O00425	KH_1;RRM_1	16	14	14	31.1	27.1	27.1	63.704	0	90.249	875970000	29	109	17.0544	17.8157	17.101	22.4718	22.3922	22.3521	20.0194	20.9439	20.5051	22.5714	22.5561	22.3956	5.08172	2.70503	3.16579	3.00753	5.18404	2.83676	-1.91593	1.75709	0.102323	0.675843	2.01825	1.85372
110	NOP56	Nucleolar protein 56	O00567	O00567	Nop;NOP5NT;NOSIC	7	7	7	15	15	15	66.049	0	25.836	96123000	31	33	15.7493	16.3441	16.3097	17.8328	18.5274	18.4544	18.5236	18.6829	18.3974	18.3777	18.9047	18.0444	2.13717	2.69795	2.40029	2.6454	2.30792	2.62291	0.26312	0.446446	0.170742	0.196424	-0.092378	0.1225
111	DDX3X;DDX3Y	ATP-dependent RNA helicase DDX3X;ATP-dependent RNA helicase DDX3Y	O00571;O15523	O00571;O15523;Q9NQI0	DEAD;Helicase_C	28	28	27	37.8	37.8	36.1	73.243	0	182.52	3119900000	39	359	17.1724	15.7714	15.3237	22.5845	22.6247	22.3684	21.9239	22.2495	22.2902	22.6313	22.4213	22.671	6.43668	2.18529	6.06535	2.18932	6.48535	2.1892	-0.371333	1.18588	0.0486654	0.165031	0.419999	1.32784
112	NME4	Nucleoside diphosphate kinase, mitochondrial	O00746	O00746	NDK	4	4	4	27.3	27.3	27.3	20.658	0	36.257	295040000	12	37	16.0301	15.6782	17.1461	19.1689	18.5973	16.4408	21.0647	19.6167	19.865	19.9539	19.9976	20.1061	1.7842	0.816001	3.89734	2.462	3.73439	1.88434	2.11314	0.962755	1.95018	0.844661	-0.162955	0.124362
116	IRS4	Insulin receptor substrate 4	O14654	O14654;H3BTC1	IRS	18	18	18	18.5	18.5	18.5	133.77	0	90.253	483560000	59	85	15.5	16.732	15.2523	19.8235	19.6226	20.2548	21.2906	20.7131	20.4091	20.243	20.0953	20.0597	4.07221	2.2318	4.97617	2.69576	4.30458	1.98938	0.903959	1.27935	0.23237	0.469919	-0.67159	0.936492
117	PRMT5	Protein arginine N-methyltransferase 5;Protein arginine N-methyltransferase 5, N-terminally processed	O14744	O14744	PRMT5	13	13	13	21.5	21.5	21.5	72.683	0	56.954	764170000	32	104	16.799	17.504	15.5094	20.7002	20.9153	20.4571	21.4559	21.3363	21.0316	21.0625	20.9319	20.8552	4.08673	1.79507	4.67046	1.91021	4.34571	1.77597	0.583728	1.47762	0.258986	0.745561	-0.324743	0.970201
118	TCERG1	Transcription elongation regulator 1	O14776	O14776	FF;WW	3	3	3	2.3	2.3	2.3	123.9	0	6.5337	24223000	41	8	15.3961	16.3964	16.7569	17.6637	16.2005	16.4207	16.4667	17.6958	17.5527	16.7801	16.829	17.2073	0.578491	0.400248	1.05527	0.872892	0.755661	0.705221	0.476774	0.326757	0.17717	0.130643	-0.299604	0.276822
120	PSMA7	Proteasome subunit alpha type-7	O14818	O14818;Q8TAA3	Proteasome;Proteasome_A_N	8	8	8	32.3	32.3	32.3	27.887	0	22.194	120370000	14	43	16.7016	16.3113	15.6478	18.5886	18.6452	16.2116	18.7313	18.3298	19.2118	18.6288	18.3937	18.9111	1.59488	0.75629	2.53742	2.4524	2.42433	2.18826	0.942539	0.441103	0.829453	0.386954	-0.113085	0.139167
121	BCKDK	[3-methyl-2-oxobutanoate dehydrogenase [lipoamide]] kinase, mitochondrial	O14874	O14874	BCDHK_Adom3;HATPase_c	5	5	5	15.5	15.5	15.5	46.36	0	32.355	70314000	22	21	16.4698	17.7201	17.7816	19.4849	19.2162	18.6345	16.493	17.5985	17.3665	15.1452	15.6915	15.8749	1.788	1.49039	0	NaN	0	NaN	-1.95917	1.93936	-3.54132	3.31212	0	NaN
122	GEMIN2	Gem-associated protein 2	O14893	O14893		2	2	2	6.8	6.8	6.8	31.585	0	16.648	79465000	13	16	16.4271	16.3849	16.2535	19.3646	18.9559	19.6314	16.6246	18.2684	15.6118	19.9756	20.5051	19.722	2.96216	2.57393	0.479795	0.222683	3.71244	2.5787	-2.48237	1.1135	0.750275	1.15438	3.23264	1.36287
125	HNRNPDL	Heterogeneous nuclear ribonucleoprotein D-like	O14979	O14979	RRM_1	3	3	3	9	9	9	46.437	0	44.835	140230000	20	31	16.7945	17.9292	17.197	21.3147	21.5624	20.7662	17.1632	17.0458	17.0077	19.856	19.4267	19.4797	3.90753	2.96752	0	NaN	2.28055	1.94443	-4.14221	2.62619	-1.62698	2.10928	2.51523	2.93428
127	U2SURP	U2 snRNP-associated SURP motif-containing protein	O15042	O15042	cwf21;RRM_1;Surp	11	11	11	12.5	12.5	12.5	118.29	0	32.546	441380000	39	45	16.3779	16.6812	15.5872	22.0434	21.4261	15.7599	17.1729	20.6608	21.8248	22.6931	22.3583	22.19	3.52773	0.662727	3.67074	0.94786	6.19834	3.19597	0.143016	0.0193705	2.67061	0.50422	2.5276	0.675399
129	POLR1C	DNA-directed RNA polymerases I and III subunit RPAC1	O15160	O15160	RNA_pol_A_bac;RNA_pol_L	6	6	6	20.8	20.8	20.8	39.249	0	31.666	158240000	17	52	16.3525	17.1178	16.3156	19.3255	19.3632	19.7527	18.1185	18.6323	18.6989	19.1994	19.3806	19.3776	2.88519	2.6532	1.88795	2.24022	2.72394	2.16959	-0.997243	1.84411	-0.161249	0.437338	0.835994	1.46075
132	NKRF	NF-kappa-B-repressing factor	O15226	O15226	G-patch;R3H	19	19	19	29.3	29.3	29.3	77.672	0	92.675	674740000	40	108	15.6912	16.9474	16.1646	20.459	20.4795	20.3237	19.7084	19.3884	20.3071	20.5047	20.2635	19.7681	4.15298	2.16125	3.53353	2.68206	3.91098	2.70632	-0.619449	0.84153	-0.241996	0.419184	0.377453	0.470034
133	CASC3	Protein CASC3	O15234	O15234	Btz	5	5	5	12.1	12.1	12.1	76.277	0	98.086	27202000	27	13	16.1999	16.7153	16.5106	16.4867	16.7869	17.5436	16.7869	15.9731	16.3737	19.2649	18.6639	18.036	0.463805	0.554295	0	NaN	2.17969	1.83722	-0.561128	0.635455	1.71588	1.63976	2.27701	2.06039
138	EIF3D	Eukaryotic translation initiation factor 3 subunit D	O15371	O15371	eIF-3_zeta	16	16	16	36.3	36.3	36.3	63.972	0	134.15	4187900000	25	201	16.6022	16.6616	15.5582	23.8906	23.6918	23.6091	24.2581	24.1566	24.4571	23.494	23.2004	23.4756	7.45649	2.8342	8.01662	2.92645	7.11597	2.84304	0.56013	1.99851	-0.340516	1.25601	-0.900646	2.63832
139	EIF3H	Eukaryotic translation initiation factor 3 subunit H	O15372	O15372	JAB	10	10	10	23	23	23	39.93	0	53.544	1408800000	20	160	15.9004	16.5902	16.3254	22.0594	22.1267	22.0181	23.3774	22.8471	22.6832	22.5031	22.4317	22.2024	5.79611	3.02583	6.69728	4.67341	6.10709	3.75632	0.901175	1.32604	0.310982	1.20329	-0.590192	1.04687
140	NVL	Nuclear valosin-containing protein-like	O15381	O15381	AAA	10	10	10	14.1	14.1	14.1	95.05	0	34.989	73937000	47	46	17.3286	16.0612	16.4814	18.6589	18.741	18.3698	17.1955	17.094	17.7474	18.421	18.7831	18.6339	1.96619	1.58495	0.7219	0.733235	1.98894	1.5821	-1.24429	1.94126	0.0227477	0.0507361	1.26704	1.93618
141	CD3EAP	DNA-directed RNA polymerase I subunit RPA34	O15446	O15446	RNA_polI_A34	8	8	8	24.3	24.3	24.3	54.985	0	24.669	98677000	20	34	16.9534	17.8475	17.1137	19.3241	18.9362	16.2757	14.6002	18.0704	18.8569	19.242	18.8132	18.7805	0.873805	0.33565	-0.129032	0.0309373	1.64033	1.89677	-1.00284	0.242221	0.766529	0.293538	1.76937	0.511215
142	MAGEB2	Melanoma-associated antigen B2	O15479	O15479;O15481;Q96LZ2;P43366;Q9UBF1	MAGE;MAGE_N	3	3	3	10	10	10	35.277	0	28.132	54542000	13	8	16.4325	15.9969	16.917	16.5688	17.2426	16.3621	19.4057	18.9541	19.5521	18.0731	18.9845	19.0358	0	NaN	2.85513	2.80615	2.24898	2.23564	2.57945	2.65608	1.9733	2.03796	-0.60615	0.73057
144	DHX15	Pre-mRNA-splicing factor ATP-dependent RNA helicase DHX15	O43143	O43143;O60231	DEAD;HA2;Helicase_C;OB_NTP_bind	11	11	10	14.3	14.3	13.2	90.932	0	39.893	239380000	39	61	16.3962	17.5328	15.8091	19.4344	19.7122	19.597	19.766	19.6061	19.8117	19.4843	19.7127	19.2736	3.00187	1.60462	3.1486	1.62979	2.91083	1.63116	0.14673	0.643069	-0.091039	0.234541	-0.237769	0.712901
145	PRPF4	U4/U6 small nuclear ribonucleoprotein Prp4	O43172	O43172	PRP4;WD40	8	8	8	16.5	16.5	16.5	58.449	0	36.973	177130000	30	43	17.4335	15.9184	16.8507	19.9375	19.6844	15.657	18.3708	18.6554	18.6843	20.1327	20.17	19.7141	1.6921	0.459208	1.83599	1.32643	3.27144	1.94679	0.143886	0.0329567	1.57934	0.428682	1.43545	2.67967
146	PHGDH	D-3-phosphoglycerate dehydrogenase	O43175	O43175	2-Hacid_dh;2-Hacid_dh_C	7	7	7	15	15	15	56.65	0	37.857	199750000	24	26	16.7351	17.0869	17.0011	19.7182	19.0203	18.6575	18.5621	18.5868	19.8488	18.6752	18.0794	20.6527	2.19097	1.90291	2.0582	1.47265	2.19475	0.98554	-0.132772	0.0891332	0.00377782	0.0014259	0.13655	0.0520556
148	SART1	U4/U6.U5 tri-snRNP-associated protein 1	O43290	O43290	SART-1	18	18	18	25.5	25.5	25.5	90.254	0	231.6	560900000	38	102	16.5586	17.2377	16.2573	19.7628	20.1148	20.1684	21.7887	20.8984	20.739	20.6028	20.656	21.0007	3.33077	2.56961	4.45752	3.254	4.06859	2.7877	1.12674	1.22387	0.737816	1.84253	-0.388927	0.444877
150	HNRNPR	Heterogeneous nuclear ribonucleoprotein R	O43390	O43390	RRM_1	17	17	12	26.1	26.1	18.5	70.942	0	95.436	1369400000	34	170	16.8949	16.1279	16.2926	22.2551	21.9131	21.9082	22.1411	21.7849	21.7934	22.1622	21.887	21.9024	5.587	3.57865	5.46798	3.57952	5.5454	3.28498	-0.119019	0.293574	-0.0416025	0.102442	0.0774167	0.201246
151	PRPF3	U4/U6 small nuclear ribonucleoprotein Prp3	O43395	O43395	DUF1115;PRP3;PWI	8	8	8	12.6	12.6	12.6	77.528	0	30.545	231700000	33	42	16.0535	17.5547	16.6541	20.4889	20.5229	20.5127	15.7902	19.0662	18.8935	20.4907	20.9399	20.2946	3.75402	1.87939	1.1625	0.403052	3.82095	2.25337	-2.59152	0.868782	0.0669339	0.119394	2.65845	0.900864
154	EIF4G3	Eukaryotic translation initiation factor 4 gamma 3	O43432	O43432	MA3;MIF4G;W2	11	6	6	7.4	4.4	4.4	176.65	0	13.557	34405000	84	17	16.6364	14.9686	16.6506	17.01	16.9704	16.8567	16.4012	17.1511	17.3819	17.5091	18.0684	17.2301	0.86048	0.580494	0.892844	0.599647	1.51735	1.01573	0.0323633	0.0345984	0.656871	0.95057	0.624507	0.738526
155	PPIH	Peptidyl-prolyl cis-trans isomerase H	O43447	O43447	Pro_isomerase	8	8	8	34.5	34.5	34.5	19.208	0	27.671	84405000	11	30	16.2428	14.9836	15.4551	19.1198	18.9887	15.2752	17.3361	18.2489	18.0772	18.7909	18.6649	18.5117	2.23408	0.672568	2.32693	2.06016	3.09535	1.96163	0.0928567	0.0228805	0.86127	0.247862	0.768413	0.993772
158	DENR	Density-regulated protein	O43583	O43583	SUI1	3	3	3	16.7	16.7	16.7	22.092	0	32.56	21835000	9	12	17.3508	15.6555	16.2901	17.8712	17.4527	17.2707	16.0893	16.3025	16.424	16.859	16.9136	17.9227	1.09942	0.838307	0	NaN	0.799669	0.579417	-1.25957	2.12054	-0.299756	0.30353	0.959815	1.00191
159	PLRG1	Pleiotropic regulator 1	O43660	O43660	WD40	11	11	11	24.1	24.1	24.1	57.193	0	42.596	190820000	30	40	15.9205	17.0124	15.8772	19.5668	19.3135	19.7554	15.7467	18.489	19.8386	19.7493	19.8132	18.9487	3.2752	2.14112	1.75475	0.553435	3.23371	2.53134	-1.52044	0.476791	-0.0414912	0.0451185	1.47895	0.463742
164	HTATSF1	HIV Tat-specific factor 1	O43719	O43719	RRM_1	7	7	7	10.2	10.2	10.2	85.852	0	68.301	37385000	51	17	16.0485	16.431	16.302	18.9288	18.9292	18.6923	16.5378	16.3852	15.8978	16.2225	15.4751	17.8653	2.58962	3.99256	0	NaN	0.260488	0.125531	-2.57651	2.69039	-2.32913	1.10179	0.247379	0.117028
165	AP1G1	AP-1 complex subunit gamma-1	O43747	O43747	Adaptin_N;Alpha_adaptinC2	6	6	6	6.9	6.9	6.9	91.35	0	11.072	46127000	35	13	17.6243	17.3077	16.4043	16.185	15.5439	18.931	16.3111	17.0706	15.865	18.0614	18.6487	18.128	-0.225501	0.0688873	0	NaN	1.16723	1.17983	-0.471044	0.153398	1.39273	0.507265	1.86377	1.74617
167	NUDT21	Cleavage and polyadenylation specificity factor subunit 5	O43809	O43809	NUDIX_2	5	5	5	18.5	18.5	18.5	26.227	0	21.028	68444000	14	37	16.3752	16.7397	15.92	18.7242	18.7789	18.9033	16.8093	18.7952	18.2639	17.6203	17.8136	17.8594	2.45715	2.15856	1.61112	1.0078	1.41945	1.71276	-0.846028	0.538034	-1.0377	3.26328	-0.191669	0.108911
169	RAD21	Double-strand-break repair protein rad21 homolog	O60216	O60216	Rad21_Rec8;Rad21_Rec8_N	7	7	7	13	13	13	71.689	0	46.478	41517000	26	27	15.3396	17.1863	17.2747	18.0649	17.8422	15.5907	15.2065	14.6971	16.209	18.2543	18.5642	18.5351	0.565746	0.216781	0	NaN	1.85104	1.01879	-1.79505	0.861113	1.28529	0.612297	3.08034	1.78367
171	PRPSAP2	Phosphoribosyl pyrophosphate synthase-associated protein 2	O60256	O60256	Pribosyl_synth;Pribosyltran_N	4	4	3	9.2	9.2	5.4	40.925	0	15.318	156310000	23	22	16.8733	16.5123	16.776	19.3243	18.4331	17.6531	17.0723	20.0773	19.8009	19.7747	20.2132	19.608	1.74963	1.20655	2.26295	0.852164	3.14475	3.39405	0.513321	0.176708	1.39512	1.05738	0.881795	0.340975
172	SMARCA5	SWI/SNF-related matrix-associated actin-dependent regulator of chromatin subfamily A member 5	O60264	O60264	DBINO;HAND;Helicase_C;SLIDE;SNF2_N	12	12	6	11.5	11.5	6.8	121.9	0	38.973	113600000	55	39	15.8398	17.5465	15.4328	19.0519	19.253	18.6657	18.7914	18.226	19.1634	18.8641	19.3489	18.3517	2.71717	1.35178	2.45386	1.32711	2.58189	1.38871	-0.263306	0.32995	-0.135275	0.14766	0.128031	0.117503
174	ZFC3H1	Zinc finger C3H1 domain-containing protein	O60293	O60293	zf-C3H1	11	11	11	7.1	7.1	7.1	226.35	0	39.466	109840000	90	29	18.0765	16.6075	16.3421	18.6772	18.7569	18.5808	18.6656	18.563	17.6375	18.6839	19.3974	18.5182	1.66291	1.04684	1.28	0.895503	1.85781	1.25546	-0.382909	0.441307	0.194892	0.261986	0.577801	0.607476
176	SYNCRIP	Heterogeneous nuclear ribonucleoprotein Q	O60506	O60506	RRM_1	11	6	6	18.9	11.2	11.2	69.602	0	35.883	157050000	32	56	16.6335	16.5493	15.6581	20.2885	20.2276	20.0021	15.5505	17.8125	18.1525	19.1078	19.579	20.5239	3.89242	2.40579	0.89154	0.404535	3.45657	2.45946	-3.00088	1.18607	-0.435848	0.391694	2.56503	1.16353
177	NEMF	Nuclear export mediator factor NEMF	O60524	O60524	DUF3441;DUF814	13	13	13	12.5	12.5	12.5	122.95	0	36.54	134960000	50	51	16.1333	16.1997	16.1005	19.2616	18.6488	19.0266	17.3886	17.9334	18.1704	19.665	19.7452	19.0426	2.83447	2.48964	1.68624	1.76753	3.33973	2.4113	-1.14823	1.7145	0.505256	0.812094	1.65348	2.17067
178	CCNT1	Cyclin-T1	O60563	O60563	Cyclin_N	5	5	4	9.4	9.4	7.6	80.684	0	23.823	37725000	26	9	17.6609	18.3856	16.1706	16.6886	16.4648	16.9131	18.5664	18.8676	18.6657	17.0781	14.8605	17.554	0	NaN	1.29421	0.73626	0	NaN	2.01107	3.36522	0	NaN	-2.20236	0.935908
180	EIF4E2	Eukaryotic translation initiation factor 4E type 2	O60573	O60573	IF4E	11	11	11	35.9	35.9	35.9	28.362	0	323.31	10852000000	13	527	16.4224	16.4729	17.0413	24.7951	24.9691	22.0926	25.5154	25.6779	26.5057	24.9329	24.0724	26.1124	7.30669	1.88996	9.25411	4.29252	8.39372	2.62664	1.94741	0.789447	1.08703	0.409549	-0.860386	0.542301
184	DKC1	H/ACA ribonucleoprotein complex subunit 4	O60832	O60832	DKCLD;PUA;TruB_N	12	12	12	20.6	20.6	20.6	57.673	0	59.588	186810000	31	45	15.9544	15.4867	16.2127	19.5786	19.3442	19.7665	19.7922	19.2057	19.4705	19.436	19.6061	19.0306	3.67851	3.34173	3.60485	3.60329	3.47296	3.54509	-0.0736593	0.128452	-0.205541	0.410912	-0.131882	0.212718
185	EIF5B	Eukaryotic translation initiation factor 5B	O60841	O60841	GTP_EFTU;GTP_EFTU_D2;GTP_EFTU_D4;IF-2	30	30	30	22.8	22.8	22.8	138.83	0	323.31	1536500000	50	175	16.2793	16.657	15.4742	22.7483	22.7198	22.1604	21.0398	20.7777	20.4621	22.2272	22.104	21.8173	6.40599	3.36791	4.62303	2.81033	5.91266	2.83793	-1.78295	2.63417	-0.493329	0.96867	1.28963	2.34593
186	EDF1	Endothelial differentiation-related factor 1	O60869	O60869	HTH_3;MBF1	7	7	7	35.8	35.8	35.8	16.368	0	43.758	439530000	9	75	16.177	17.0293	16.6702	21.0884	21.5166	21.1906	20.1534	20.601	20.5747	21.0228	20.9303	21.1847	4.63969	3.33985	3.81749	3.2078	4.42042	2.80378	-0.822196	1.86319	-0.219268	0.634232	0.602928	1.46091
192	OBSL1	Obscurin-like protein 1	O75147	O75147	I-set	18	18	18	10.2	10.2	10.2	206.94	0	98.246	459260000	92	133	15.8555	15.9314	16.3	19.4108	19.6476	19.6198	20.4045	20.0755	19.7687	20.122	19.9029	19.7537	3.53046	3.80749	4.05392	3.98709	3.89725	4.42745	0.523465	1.05288	0.366791	1.26074	-0.156674	0.291612
193	ZC3H11A	Zinc finger CCCH domain-containing protein 11A	O75152	O75152;A0A1B0GTU1		10	10	10	15.2	15.2	15.2	89.13	0	85.017	143460000	42	28	16.2381	16.5054	16.0586	20.4907	20.8946	19.9074	15.6525	17.6333	17.1918	20.7818	19.6093	19.6764	4.16356	2.8731	0.558506	0.34481	3.75515	2.25542	-3.60506	1.85835	-0.408415	0.353886	3.19664	1.80086
194	DNAJC13	DnaJ homolog subfamily C member 13	O75165	O75165	DnaJ;DUF4339	6	6	6	3.3	3.3	3.3	254.41	0	44.801	31403000	112	10	17.4644	16.7961	14.9797	16.8269	16.1741	15.4267	18.5597	17.6659	17.7655	15.8294	16.0858	16.5785	0	NaN	1.58366	0.808495	0	NaN	1.8545	1.61619	0	NaN	-1.83247	2.0926
196	ANKRD17	Ankyrin repeat domain-containing protein 17	O75179	O75179	Ank;Ank_2;KH_1	22	22	13	9.1	9.1	5.4	274.25	0	105.66	303140000	88	74	16.6215	17.7923	16.641	19.8157	19.4227	19.0734	19.6371	19.9244	19.9226	19.4902	19.5713	19.5875	2.41901	1.96525	2.80977	1.84553	2.53143	1.65679	0.390762	0.694179	0.112413	0.184689	-0.278349	1.05059
198	CS	Citrate synthase, mitochondrial	O75390	O75390	Citrate_synt	5	5	5	12	12	12	51.712	0	13.329	81312000	19	16	15.5921	17.4934	15.7856	19.2901	18.8579	16.9131	16.2936	18.7664	19.1086	19.1427	19.0341	19.4866	2.06332	1.01047	1.76581	0.733663	2.93073	1.46124	-0.297511	0.0920759	0.867414	0.447342	1.16493	0.496598
199	PRPF40A	Pre-mRNA-processing factor 40 homolog A	O75400	O75400	FF;WW	7	7	7	7	7	7	108.8	0	17.14	41536000	33	21	16.3267	15.3732	16.5178	15.6077	16.227	16.8456	18.0461	17.8926	18.2442	15.809	17.1202	16.1468	0	NaN	1.98837	1.63455	0.286089	0.209278	1.83422	1.54736	0.131939	0.0882133	-1.70228	1.37658
204	BANF1	Barrier-to-autointegration factor;Barrier-to-autointegration factor, N-terminally processed	O75531	O75531	BAF	4	4	4	29.2	29.2	29.2	10.058	0	8.233	125880000	6	16	15.895	16.3999	17.0484	19.8349	19.8017	19.687	20.0354	17.5633	19.9992	19.8855	17.7978	16.4051	3.32676	2.04727	2.75154	1.20593	1.58172	0.594787	-0.575222	0.255751	-1.74505	0.645128	-1.16983	0.375319
205	SF3B1	Splicing factor 3B subunit 1	O75533	O75533	SF3b1	27	27	27	21.5	21.5	21.5	145.83	0	192.24	911740000	62	130	17.0386	16.6777	16.8751	20.6438	20.7698	20.9138	21.2963	20.7982	20.7661	20.6581	20.6342	20.491	3.91196	4.83329	4.08973	3.85838	3.73062	4.1071	0.177772	0.376826	-0.181341	0.867191	-0.359112	0.787443
207	PRKRA	Interferon-inducible double-stranded RNA-dependent protein kinase activator A	O75569	O75569	dsrm	7	7	7	22	22	22	34.404	0	74.873	355980000	14	53	17.105	15.7162	15.1136	21.5794	21.2068	21.593	15.9632	19.1492	19.828	21.158	21.364	21.434	5.48147	2.04827	2.33522	0.745731	5.34039	1.96657	-3.14625	0.932344	-0.14108	0.385583	3.00517	0.896012
208	MYCBP2	E3 ubiquitin-protein ligase MYCBP2	O75592	O75592	Filamin;PHR;RCC1;SH3_3;zf-RING_2	25	25	25	6.6	6.6	6.6	513.63	0	88.553	365730000	218	92	16.208	16.0594	16.2903	20.865	20.625	19.0366	20.7764	19.9263	19.3203	20.5675	20.9131	20.7613	3.98961	1.72337	3.82176	1.97879	4.56136	4.98359	-0.167854	0.0828844	0.571744	0.372032	0.739597	0.661996
209	NPM3	Nucleoplasmin-3	O75607	O75607		3	3	3	23.6	23.6	23.6	19.343	0	35.988	138100000	8	18	16.4771	15.6632	15.0493	20.7976	21.1549	15.193	20.0706	20.0813	19.8893	15.5532	15.8472	15.5832	3.3186	0.649234	4.28389	2.09309	0	NaN	0.965291	0.176059	-3.38728	0.655241	-4.35257	4.99277
210	SNRNP200	U5 small nuclear ribonucleoprotein 200 kDa helicase	O75643	O75643	DEAD;Helicase_C;Sec63	35	35	35	17.5	17.5	17.5	244.5	0	218.12	1293700000	118	262	15.8448	15.6891	16.1321	20.5994	20.6441	20.0811	21.2705	21.0343	20.9501	20.8224	20.7735	20.5771	4.55286	4.15563	5.19628	4.9236	4.83568	4.40717	0.643421	1.29724	0.282815	0.594063	-0.360606	1.35144
214	EIF3G	Eukaryotic translation initiation factor 3 subunit G	O75821	O75821	eIF3g;RRM_1	14	14	14	44.7	44.7	44.7	35.611	0	323.31	2591800000	19	226	15.3466	19.1928	15.9965	23.0438	22.9351	22.9847	23.5223	22.8845	22.4227	22.3966	22.3745	22.4824	6.14257	1.45116	6.09788	1.53633	5.57254	1.37143	-0.044693	0.044987	-0.570032	3.62707	-0.525339	0.619344
215	EIF3J	Eukaryotic translation initiation factor 3 subunit J	O75822	O75822	eIF3_subunit	13	13	13	43	43	43	29.062	0	97.052	1315600000	14	107	16.8723	17.3843	16.5621	22.1623	21.7989	21.6136	22.4318	22.4751	22.685	21.8022	22.0671	21.719	4.91868	3.76595	5.59104	3.12911	4.92318	3.25105	0.672356	1.45395	0.00449626	0.00760654	-0.66786	2.06672
217	BCAS2	Pre-mRNA-splicing factor SPF27	O75934	O75934	BCAS2	5	5	5	21.8	21.8	21.8	26.131	0	21.423	169210000	13	30	16.3391	15.0435	16.3068	19.3867	19.5479	16.5458	16.4401	19.6193	20.1058	19.335	19.3605	19.2537	2.59703	0.997307	2.82532	0.919457	3.41999	1.82992	0.228285	0.0520122	0.822955	0.312003	0.59467	0.182771
220	RSL1D1	Ribosomal L1 domain-containing protein 1	O76021	O76021	Ribosomal_L1	15	15	15	33.3	33.3	33.3	54.972	0	158.91	510620000	22	104	17.0098	16.6394	18.1049	20.6289	20.6326	20.3173	21.3435	21.1439	20.9674	20.1639	19.8023	19.9506	3.27492	1.86131	3.90024	2.03503	2.72093	1.68961	0.625324	1.84397	-0.553991	1.69673	-1.17931	2.83603
222	SRP72	Signal recognition particle subunit SRP72	O76094	O76094	SRP72;TPR_1;TPR_6	12	12	12	22.1	22.1	22.1	74.605	0	112.79	729900000	33	57	16.6031	15.5381	16.4311	21.1543	21.2035	20.887	21.9872	21.257	21.7472	21.6543	21.2545	21.1954	4.8909	2.60685	5.47307	3.41483	5.17733	2.93061	0.582172	1.01505	0.286434	0.73201	-0.295738	0.487802
225	URI1	Unconventional prefoldin RPB5 interactor 1	O94763	O94763	Prefoldin	3	3	3	6.5	6.5	6.5	59.832	0	8.6154	25607000	21	10	15.3674	17.4873	16.3192	18.494	18.4289	18.3756	15.5425	17.0592	16.2716	18.3995	16.4383	14.7038	2.04152	1.1018	0	NaN	0.12258	0.0331017	-2.14172	1.41294	-1.91894	0.669647	0.222783	0.0651439
229	PRPF6	Pre-mRNA-processing factor 6	O94906	O94906	PRP1_N;TPR_8	24	24	24	27.6	27.6	27.6	106.92	0	236.23	792660000	56	161	16.0749	18.3443	15.3199	20.2142	20.0286	20.0375	20.9979	20.9312	20.9113	20.3532	20.348	20.3506	3.51372	1.22006	4.36708	1.39166	3.77084	1.27189	0.853355	2.80133	0.257119	1.29282	-0.596235	2.72852
234	CCNB2	G2/mitotic-specific cyclin-B2	O95067	O95067	Cyclin_C;Cyclin_N	7	7	7	20.4	20.4	20.4	45.281	0	19.069	104000000	22	23	16.2001	15.8375	16.3292	19.2478	19.513	20.4569	16.1536	15.6128	14.8519	19.9355	20.1497	19.2806	3.61698	2.33695	0	NaN	3.6663	3.03378	-4.19985	2.87198	0.0493151	0.0368554	4.24917	2.88776
235	IKBKAP	Elongator complex protein 1	O95163	O95163	IKI3	13	13	13	12.2	12.2	12.2	150.25	0	58.217	277320000	63	65	17.3514	16.5942	16.5022	20.4796	20.3267	20.0073	20.2822	20.5411	20.2732	20.8467	20.6947	21.266	3.45527	2.83883	3.54956	2.53478	4.11984	3.27399	0.0942891	0.219963	0.664567	1.38316	0.570278	1.22624
237	ZRANB2	Zinc finger Ran-binding domain-containing protein 2	O95218	O95218	zf-RanBP	8	8	8	26.7	26.7	26.7	37.404	0	72.688	122780000	18	21	16.3567	21.4964	16.9266	21.1316	21.4308	20.921	17.1929	15.9544	16.9684	16.3701	17.2431	17.7095	2.90124	0.666315	-1.55465	0.354706	-1.15228	0.255189	-4.45589	2.50704	-4.05352	2.35258	0	NaN
238	LUC7L3	Luc7-like protein 3	O95232	O95232	LUC7	8	8	8	18.5	18.5	18.5	51.466	0	323.31	885050000	19	69	15.9769	17.297	15.9345	18.0894	18.7237	18.4348	23.0621	22.5381	22.5276	19.0345	18.8698	18.8303	2.01319	1.4966	6.30645	2.7258	2.50872	1.54721	4.29326	4.1361	0.495535	0.992678	-3.79773	3.10742
240	SBF1	Myotubularin-related protein 5	O95248	O95248;Q86WG5	dDENN;DENN;GRAM;Myotub-related;PH;SBF2;uDENN	5	5	5	3.5	3.5	3.5	208.44	0	17.85	49528000	87	21	17.6721	16.1019	15.5742	17.6043	17.3029	15.4095	18.0125	17.9087	17.2279	18.6565	18.2717	18.6567	0.322822	0.126879	1.26696	0.764746	2.07888	1.12261	0.944134	0.519879	1.75605	0.919259	0.811919	1.21537
241	SMC2	Structural maintenance of chromosomes protein 2	O95347	O95347	SMC_hinge;SMC_N	18	18	18	15.8	15.8	15.8	135.65	0	60.753	251570000	65	76	15.8135	17.3067	16.3438	20.1784	20.1187	19.3122	16.7101	16.7738	18.6447	19.8597	20.12	20.0338	3.38177	2.30672	0.888195	0.493917	3.51648	1.88406	-2.49358	1.37176	0.134712	0.16607	2.62829	1.28601
244	CD2BP2	CD2 antigen cytoplasmic tail-binding protein 2	O95400	O95400	GYF	6	6	6	24.9	24.9	24.9	37.646	0	35.624	258340000	13	27	16.0174	17.4291	17.7767	16.9031	19.9802	15.8243	21.5877	21.0245	20.9036	20.1596	19.938	19.5288	0.49479	0.129749	4.09751	2.04118	2.80105	1.60121	3.60272	1.01034	2.30626	0.692458	-1.29646	1.98942
246	POLR1A	DNA-directed RNA polymerase I subunit RPA1	O95602	O95602	RNA_pol_Rpb1_1;RNA_pol_Rpb1_2;RNA_pol_Rpb1_3;RNA_pol_Rpb1_4;RNA_pol_Rpb1_5	22	22	21	13.7	13.7	13.2	194.81	0	104.57	565010000	94	132	16.1884	15.4115	15.4566	21.2241	21.1936	20.9957	19.9482	20.114	20.0556	21.0366	20.9425	21.0323	5.45229	2.96511	4.35376	2.60144	5.31826	2.70596	-1.09853	3.33735	-0.134035	0.713349	0.9645	3.64593
254	STAU1	Double-stranded RNA-binding protein Staufen homolog 1	O95793	O95793	dsrm	17	17	16	32.6	32.6	31.4	63.182	0	156.76	1401800000	32	177	15.9629	15.3851	15.0459	22.5979	22.5946	22.0934	21.5381	21.1978	21.4374	22.5392	22.2128	22.0559	6.96397	4.02639	5.9264	3.19089	6.80466	3.75836	-1.03757	1.98341	-0.159311	0.292525	0.878256	2.01847
256	MAP4K4	Mitogen-activated protein kinase kinase kinase kinase 4	O95819	O95819;Q9UKE5;Q8N4C8	CNH;Pkinase	7	7	7	9.8	9.8	9.8	142.1	0	48.848	121270000	56	31	17.2988	17.3806	17.1267	18.8188	18.954	19.51	16.0967	18.9092	18.2467	19.6812	19.9812	19.6136	1.82555	2.12994	0.48218	0.202191	2.48997	3.85664	-1.34337	0.600346	0.66442	1.16693	2.00779	0.855693
257	AIFM1	Apoptosis-inducing factor 1, mitochondrial	O95831	O95831	AIF_C;Pyr_redox;Pyr_redox_2	11	11	11	18.6	18.6	18.6	66.9	0	108.24	383360000	31	68	16.6767	16.8895	16.6219	20.6893	20.5884	20.6766	20.0513	20.7901	20.3863	20.7126	20.6341	20.8652	3.92203	4.08867	3.67982	2.9246	4.00794	5.38818	-0.242205	0.426686	0.085914	0.470001	0.328119	0.583964
259	TOP3B	DNA topoisomerase 3-beta-1	O95985	O95985	Topoisom_bac;Toprim	8	8	8	10.8	10.8	10.8	96.661	0	18.608	60429000	46	13	16.2139	16.3811	17.127	18.3852	18.0833	17.7646	17.9511	18.3122	18.9885	15.9295	16.4971	17.5253	1.50371	1.81035	1.84325	1.94417	0.0766207	0.047511	0.339541	0.395571	-1.42709	1.10965	-1.76663	1.37862
261	ACTL6A	Actin-like protein 6A	O96019	O96019;O94805	Actin	4	4	4	10.3	10.3	10.3	47.46	0	14.354	68072000	20	25	14.7194	16.651	16.1197	19.7704	19.9415	19.9191	17.0452	16.6441	17.2451	19.8862	19.7277	19.1992	4.04697	1.72246	0	NaN	3.77434	1.84874	-2.89888	2.72031	-0.272633	0.496803	2.62624	3.13393
263	GLUD1;GLUD2	Glutamate dehydrogenase 1, mitochondrial;Glutamate dehydrogenase 2, mitochondrial	P00367;P49448	P00367;P49448	ELFV_dehydrog;ELFV_dehydrog_N	19	19	19	41.4	41.4	41.4	61.397	0	166.23	4306000000	33	354	18.2387	21.5822	19.2183	23.3105	23.2651	23.2431	23.9965	23.6978	23.5744	23.0237	23.3896	23.1219	3.59316	1.16448	4.07649	1.28064	3.4986	1.1537	0.483332	1.23764	-0.0945644	0.319127	-0.577896	1.58123
269	LMNA	Prelamin-A/C;Lamin-A/C	P02545	P02545	Filament;LTD	4	4	4	7.1	7.1	7.1	74.139	0	9.8642	41922000	41	9	16.7034	18.2152	16.5266	17.844	18.0252	17.8242	17.9569	18.3679	18.3861	17.5892	17.8108	17.8694	0.749418	0.528489	1.08858	0.762499	0.608096	0.427044	0.339165	0.915832	-0.141322	0.583614	-0.480487	1.26571
272	ALDOA	Fructose-bisphosphate aldolase A	P04075	P04075	Glycolytic	9	9	9	25.3	25.3	25.3	39.42	0	36.46	261530000	23	36	15.446	16.4814	15.6767	20.5496	18.0425	15.9478	17.5576	19.2418	21.1608	19.6364	19.1139	21.6176	2.31198	0.657191	3.45207	1.15737	4.25459	1.72375	1.1401	0.268659	1.94262	0.537834	0.802521	0.243712
276	TP53	Cellular tumor antigen p53	P04637	P04637	P53;P53_TAD;P53_tetramer	8	8	8	24.2	24.2	24.2	43.653	0	37.18	228570000	18	48	17.183	17.19	16.5257	20.3195	19.8948	21.6077	20.3119	19.8609	19.7148	20.9645	21.0093	20.7501	3.64109	1.99825	2.99627	3.25047	3.94173	2.92673	-0.64482	0.471084	0.300637	0.207656	0.945457	1.6851
278	RPN1	Dolichyl-diphosphooligosaccharide--protein glycosyltransferase subunit 1	P04843	P04843	Ribophorin_I	7	7	7	12.5	12.5	12.5	68.569	0	21.85	68023000	37	20	16.745	16.3983	16.8851	18.3876	18.155	15.7284	16.7621	18.1744	18.5921	18.1548	18.0475	18.3468	0.747557	0.325025	1.16673	0.788223	1.50688	2.68804	0.419178	0.152451	0.759322	0.331227	0.340144	0.219613
282	SLC25A5	ADP/ATP translocase 2;ADP/ATP translocase 2, N-terminally processed	P05141	P05141;Q9H0C2	Mito_carr	7	7	3	22.8	22.8	11.1	32.852	0	18.314	170840000	19	36	17.12	15.7207	16.048	19.5275	19.4283	16.1347	19.3678	19.0897	20.0689	19.6582	19.0134	19.9198	2.06727	0.706216	3.21259	2.30956	3.23424	2.29036	1.14532	0.382971	1.16698	0.391199	0.0216548	0.018133
283	PCCA	Propionyl-CoA carboxylase alpha chain, mitochondrial	P05165	P05165	Biotin_carb_C;Biotin_lipoyl;CPSase_L_chain;CPSase_L_D2	12	12	12	18.1	18.1	18.1	80.058	0	53.542	433220000	46	63	20.621	22.7595	21.0716	21.1868	21.007	21.2025	20.8293	20.9605	20.29	21.1209	21.1452	21.1035	-0.351935	0.191493	-0.790774	0.457128	-0.36084	0.197198	-0.438839	0.803675	-0.00890541	0.0452242	0.429934	0.76784
284	PCCB	Propionyl-CoA carboxylase beta chain, mitochondrial	P05166	P05166	Carboxyl_trans	9	9	9	19.9	19.9	19.9	58.215	0	48.395	122510000	30	30	16.4827	21.9014	15.566	19.4939	19.1971	19.5768	17.3889	19.7036	19.3791	19.6077	18.6517	19.8732	1.43924	0.265644	0.840516	0.142075	1.39421	0.255138	-0.598723	0.30443	-0.0450274	0.0377416	0.553696	0.263598
285	EIF2S1	Eukaryotic translation initiation factor 2 subunit 1	P05198	P05198	EIF_2_alpha;S1	17	17	17	48.6	48.6	48.6	36.112	0	120.03	2017000000	22	197	15.7633	21.0368	16.2536	23.2494	22.7787	23.4492	23.8878	23.3551	23.1777	22.8857	22.9777	22.8019	5.47458	1.09224	5.789	1.13782	5.2039	1.0439	0.314416	0.466104	-0.270685	0.516036	-0.585101	0.982389
287	RPLP2	60S acidic ribosomal protein P2	P05387	P05387		9	9	8	95.7	95.7	80.9	11.665	0	236.5	3921900000	5	189	15.4487	23.2116	16.1434	23.7144	24.0349	22.6623	24.1642	24.1803	24.2641	23.2374	22.3722	23.142	5.20265	0.775657	5.93495	0.856783	4.64931	0.69809	0.732307	0.659877	-0.55334	0.472823	-1.28565	1.38742
288	RPLP0;RPLP0P6	60S acidic ribosomal protein P0;60S acidic ribosomal protein P0-like	P05388;Q8NHW5	P05388;Q8NHW5	Ribosomal_L10	12	12	12	46.4	46.4	46.4	34.273	0	186.64	13052000000	13	292	16.1275	19.3064	16.8163	25.1217	24.8805	24.4096	25.2555	25.6703	25.7722	24.6367	24.881	25.1995	7.38724	1.86949	8.14927	1.91896	7.489	1.84684	0.762032	1.32066	0.101763	0.141631	-0.660268	1.35886
290	SSB	Lupus La protein	P05455	P05455	La;RRM_1;RRM_3	17	17	17	33.8	33.8	33.8	46.836	0	155.32	1027500000	22	80	16.3017	21.5612	16.4003	22.9777	23.0913	23.5876	22.6359	22.1998	22.1931	22.786	23.0344	22.626	5.13113	1.01607	4.25518	0.876249	4.72773	0.95095	-0.875947	1.63244	-0.403397	0.807115	0.47255	1.16087
292	CDK1	Cyclin-dependent kinase 1	P06493	P06493;P24941;Q9NYV4;Q00536;Q00534;Q00537;O94921;Q07002;Q00535;P11802;Q96Q40	Pkinase	7	6	5	24.9	22.2	18.5	34.095	0	34.858	21193000	19	17	16.1225	16.443	15.4092	16.893	17.3085	15.9006	15.6796	17.5608	17.0319	17.0841	16.9266	17.6848	0.709104	0.604607	0	NaN	1.24028	1.45358	0.0567754	0.0271305	0.531175	0.463325	0.4744	0.303351
295	EIF4E	Eukaryotic translation initiation factor 4E	P06730	P06730	IF4E	6	6	6	35.9	35.9	35.9	25.097	0	60.994	416000000	11	64	16.1852	16.124	16.4849	21.0839	20.616	20.6395	20.6634	20.7637	21.1581	20.7203	20.5552	20.2758	4.51513	4.43557	4.59707	4.4858	4.25242	4.72638	0.0819429	0.141626	-0.262708	0.583618	-0.344651	0.795746
296	ENO1	Alpha-enolase	P06733	P06733;P13929	Enolase_C;Enolase_N	16	16	15	38	38	33.9	47.168	0	258.46	796560000	22	97	16.5496	18.0988	17.0534	21.8471	19.6785	16.9143	17.7974	20.3286	22.7897	19.394	19.3599	23.3846	2.24606	0.598373	3.07131	0.802091	3.47889	0.962018	0.825251	0.151837	1.23283	0.249733	0.407578	0.0726918
298	NPM1	Nucleophosmin	P06748	P06748		10	10	10	36.7	36.7	36.7	32.575	0	323.31	29714000000	12	263	16.4679	22.7377	16.5188	27.8334	28.0789	26.8431	27.5184	27.2126	26.9509	27.1692	27.4576	26.66	9.01032	1.34208	8.65251	1.28008	8.52079	1.27429	-0.357817	0.34243	-0.489538	0.464303	-0.13172	0.173535
301	LDHB	L-lactate dehydrogenase B chain	P07195	P07195	Ldh_1_C;Ldh_1_N	10	10	9	29.9	29.9	26.3	36.638	0	118.55	1094000000	17	93	16.9086	21.844	16.5237	22.1297	20.028	19.8273	20.6309	20.9686	22.8301	20.2867	20.0196	23.189	2.23619	0.488759	3.05107	0.678682	2.73963	0.591794	0.814874	0.334307	0.503439	0.148477	-0.311435	0.0897322
304	TUBB;TUBB2B;TUBB2A	Tubulin beta chain;Tubulin beta-2B chain;Tubulin beta-2A chain	P07437;Q9BVA1;Q13885	P07437;Q9BVA1;Q13885;Q13509;A0A0B4J269;A6NNZ2;Q9BUF5;Q9H4B7;CON__ENSEMBL:ENSBTAP00000025008	Tubulin;Tubulin_C	11	3	3	27.3	9.5	9.5	49.67	0	40.108	614160000	20	83	17.0714	16.4123	16.083	21.9421	21.5956	20.987	22.1261	21.9276	21.6826	21.642	21.3352	22.3235	4.98599	3.60654	5.38986	3.13908	5.24465	3.65878	0.403872	0.544101	0.258666	0.254197	-0.145206	0.165872
307	EPRS	Bifunctional glutamate/proline--tRNA ligase;Glutamate--tRNA ligase;Proline--tRNA ligase	P07814	P07814	GST_C_3;HGTP_anticodon;ProRS-C_1;tRNA-synt_1c;tRNA-synt_1c_C;tRNA-synt_2b;WHEP-TRS	31	31	31	23.7	23.7	23.7	170.59	0	123.02	818310000	82	155	17.9051	18.4478	16.9903	20.5323	20.5316	21.0502	20.6877	20.7386	20.8058	21.0492	21.5153	21.0767	2.92362	1.94491	2.96291	1.71129	3.43263	2.06085	0.0392882	0.0742659	0.509008	1.03636	0.46972	1.08069
308	HSP90AA1	Heat shock protein HSP 90-alpha	P07900	P07900;Q14568;Q58FF6;Q58FG0;Q58FG1	HATPase_c;HSP90	24	13	13	31.7	19.4	19.4	84.659	0	219.66	522310000	33	70	16.0821	16.0368	16.3041	21.6907	20.9498	20.916	20.8571	20.4978	21.656	21.025	20.3734	21.9419	5.04449	2.9667	4.86265	2.47987	4.97241	2.16681	-0.181838	0.159316	-0.0720762	0.0465801	0.109762	0.0669208
309	HNRNPC;HNRNPCL1;HNRNPCL3;HNRNPCL2;HNRNPCL4	Heterogeneous nuclear ribonucleoproteins C1/C2;Heterogeneous nuclear ribonucleoprotein C-like 1;Heterogeneous nuclear ribonucleoprotein C-like 3;Heterogeneous nuclear ribonucleoprotein C-like 2;Heterogeneous nuclear ribonucleoprotein C-like 4	P07910;O60812;B7ZW38;B2RXH8;P0DMR1;A0A0G2JPF8	P07910;O60812;B7ZW38;B2RXH8;P0DMR1;A0A0G2JPF8	RRM_1	13	13	13	32.4	32.4	32.4	33.67	0	49.062	772610000	17	116	16.6105	16.6733	16.7137	21.824	22.1678	22.2321	21.0495	21.5541	21.5443	21.5414	20.8835	21.0147	5.40878	3.53283	4.7168	3.04045	4.48069	2.78183	-0.691977	1.48171	-0.928089	1.6185	-0.236111	0.37816
312	HSP90AB1	Heat shock protein HSP 90-beta	P08238	P08238;Q58FF8;Q58FF7	HATPase_c;HSP90	27	27	15	34.3	34.3	20.2	83.263	0	265.55	3239600000	33	273	17.8833	24.8932	17.0569	25.5991	25.1326	25.0068	24.7485	24.553	25.2532	24.6207	24.5659	25.8737	5.30167	0.780103	4.90708	0.729828	5.07562	0.757741	-0.394596	0.6441	-0.226055	0.178659	0.168541	0.126627
313	SRPR	Signal recognition particle receptor subunit alpha	P08240	P08240	SRP54;SRP54_N;SRP-alpha_N	7	7	7	11.4	11.4	11.4	69.81	0	21.026	56155000	35	19	16.2859	15.9929	16.1197	16.4774	17.5233	15.751	18.4174	17.6214	18.5784	17.6485	17.3009	17.59	0.451018	0.324147	2.07287	1.84712	1.38029	3.15077	1.62185	1.17408	0.929271	0.680171	-0.692584	0.879187
315	SNRNP70	U1 small nuclear ribonucleoprotein 70 kDa	P08621	P08621	RRM_1;U1snRNP70_N	13	13	13	35.2	35.2	35.2	51.556	0	316.11	7222600000	17	346	17.867	16.807	16.689	24.0879	24.2604	24.2371	25.1655	24.4969	24.4057	24.5234	24.6068	24.3092	7.07415	2.62718	7.5684	3.68557	7.35881	2.78464	0.494249	0.769852	0.284658	1.19429	-0.209592	0.317131
318	RPSA	40S ribosomal protein SA	P08865	P08865	Ribosomal_S2	11	11	11	45.1	45.1	45.1	32.854	0	323.31	34836000000	13	495	15.5712	21.5835	17.9546	27.1326	27.0701	26.0487	27.9091	27.3664	27.6081	26.3015	25.5998	26.4264	8.3807	1.43857	9.25809	1.48201	7.73948	1.34897	0.877386	0.941827	-0.641223	0.655372	-1.51861	1.92595
320	SNRPA	U1 small nuclear ribonucleoprotein A	P09012	P09012;P08579	RRM_1	7	7	7	30.5	30.5	30.5	31.279	0	36.576	966020000	12	94	14.9077	15.3384	17.5132	23.1345	23.1155	23.2968	21.6898	22.535	22.9125	22.5272	22.9447	23.2539	7.26249	1.92868	6.45931	2.16325	6.98886	2.02789	-0.803185	0.814545	-0.273633	0.491539	0.529552	0.538458
324	SNRPC	U1 small nuclear ribonucleoprotein C	P09234	P09234	zf-U1	3	3	3	24.5	24.5	24.5	17.394	0	49.233	502670000	6	40	15.7198	16.3651	17.0071	21.7553	22.0254	16.9911	21.9465	21.9087	22.4458	21.8104	21.8221	21.231	3.89324	0.872681	5.73634	2.97129	5.25716	2.97731	1.8431	0.4241	1.36391	0.307598	-0.479186	0.850634
327	HNRNPA1	Heterogeneous nuclear ribonucleoprotein A1;Heterogeneous nuclear ribonucleoprotein A1, N-terminally processed	P09651	P09651;Q32P51;A0A2R8Y4L2	RRM_1	9	9	9	23.9	23.9	23.9	38.746	0	91.701	480660000	18	88	15.5738	16.042	16.0619	21.0255	20.7833	20.9032	17.6236	19.7524	19.8637	21.9221	21.9677	22.1495	5.01144	3.7571	3.18734	1.36629	6.12055	3.98492	-1.8241	0.892396	1.1091	3.44958	2.9332	1.25687
328	SNRPA1	U2 small nuclear ribonucleoprotein A	P09661	P09661		6	6	6	27.5	27.5	27.5	28.415	0	40.235	261330000	10	34	15.4533	16.4855	16.8523	19.4731	19.3185	18.9563	20.3194	20.7198	20.776	18.9608	18.4901	19.2676	2.98561	1.94205	4.34134	2.30827	2.64241	1.9667	1.35573	2.52174	-0.343201	0.54385	-1.69893	2.26395
329	PARP1	Poly [ADP-ribose] polymerase 1	P09874	P09874	BRCT;PADR1;PARP;PARP_reg;WGR;zf-PARP	35	35	35	33.4	33.4	33.4	113.08	0	270.23	2210500000	51	257	15.7329	18.6951	16.0339	23.0517	22.9646	22.7458	21.1117	21.1053	21.472	22.472	22.2769	22.643	6.10007	1.65473	4.40904	1.39031	5.64329	1.59373	-1.69102	3.26223	-0.456775	1.49915	1.23425	2.77758
334	HSPA1A;HSPA1B	Heat shock 70 kDa protein 1A;Heat shock 70 kDa protein 1B	P0DMV8;P0DMV9	P0DMV8;P0DMV9	HSP70	16	15	8	28.4	26.4	12.8	70.051	0	143.68	2715600000	32	255	15.5393	21.6414	15.0853	22.8988	22.356	21.9544	23.0408	22.7862	22.8943	22.7925	22.9281	23.6717	4.98102	0.852747	5.48508	0.914509	5.70875	0.951662	0.504062	0.69653	0.72773	0.87605	0.223668	0.298417
339	HIST1H1E	Histone H1.4	P10412	P10412;Q02539;P22492	Linker_histone	6	6	1	22.8	22.8	7.3	21.865	0	56.919	1048700000	9	45	16.4594	20.4413	16.1483	23.2199	23.422	23.12	22.8663	22.0285	21.8519	21.739	20.9574	21.7957	5.57094	1.2531	4.56588	1.1301	3.81433	0.978906	-1.00506	1.12416	-1.75662	1.81002	-0.751556	0.839119
340	TXN	Thioredoxin	P10599	P10599	Thioredoxin	4	4	4	31.4	31.4	31.4	11.737	0	19.609	110450000	7	34	21.28	22.7496	21.8835	20.4507	20.4523	16.1705	16.6991	17.9743	18.2632	18.4932	17.6369	17.8251	-2.94652	0.777436	-4.32548	2.57417	-3.98593	2.54282	-1.37896	0.355737	-1.03941	0.264444	0.339549	0.238669
341	HSPD1	60 kDa heat shock protein, mitochondrial	P10809	P10809	Cpn60_TCP1	17	17	17	34.7	34.7	34.7	61.054	0	91.514	445990000	32	103	16.1995	20.2485	18.0225	19.9919	19.6319	19.7113	19.2737	19.9389	21.1461	19.7725	19.7738	20.9483	1.6215	0.523012	1.96272	0.635809	2.00803	0.652641	0.341213	0.222178	0.386529	0.36612	0.0453161	0.022317
342	HSPA5	78 kDa glucose-regulated protein	P11021	P11021	HSP70	22	22	21	37.9	37.9	35.5	72.332	0	231.1	1210400000	30	279	15.5586	18.3373	17.3071	20.8645	20.8292	20.5093	21.0169	20.7256	20.8852	20.6547	21.1321	21.2134	3.66667	1.3639	3.80825	1.38523	3.93243	1.45518	0.141575	0.424618	0.265755	0.552264	0.12418	0.245321
343	HSPA8	Heat shock cognate 71 kDa protein	P11142	P11142	HSP70	21	20	15	34.5	34.5	24.5	70.897	0	217.79	3712900000	33	389	16.9955	21.3729	16.1258	23.3717	22.9996	22.4698	23.4697	23.2616	23.4782	23.0446	22.7516	23.7354	4.7823	1.02255	5.23842	1.07654	5.01248	1.06314	0.456116	0.660675	0.230176	0.230017	-0.22594	0.281652
345	TOP1	DNA topoisomerase 1	P11387	P11387;Q969P6	Topo_C_assoc;Topoisom_I;Topoisom_I_N	22	22	22	29.2	29.2	29.2	90.725	0	104.81	832440000	38	183	18.2083	17.7286	18.7202	21.7788	21.5288	21.6283	21.3038	20.4787	20.7659	20.917	20.7038	20.4987	3.42625	2.33101	2.6304	2.61905	2.48744	2.22333	-0.795841	1.15033	-0.938801	2.28537	-0.14296	0.197773
346	TOP2A	DNA topoisomerase 2-alpha	P11388	P11388	DNA_gyraseB;DNA_topoisoIV;DTHCT;HATPase_c;Toprim	27	27	19	18.5	18.5	12.9	174.38	0	133.87	790150000	81	164	16.9644	15.0943	16.8815	22.04	21.8796	21.4248	21.5221	21.4125	21.2132	21.5669	21.7461	21.4978	5.46806	2.1061	5.06918	1.89509	5.2902	1.91722	-0.398876	0.823796	-0.177859	0.351895	0.221017	0.872019
347	PC	Pyruvate carboxylase, mitochondrial	P11498	P11498	Biotin_carb_C;Biotin_lipoyl;CPSase_L_chain;CPSase_L_D2;HMGL-like;PYC_OADA	14	14	14	13.3	13.3	13.3	129.63	0	70.303	1262100000	59	73	22.28	24.4957	22.5492	23.6478	23.3332	23.2621	22.6448	22.2874	22.529	23.4113	23.456	23.5218	0.306047	0.151407	-0.621279	0.329624	0.35472	0.179165	-0.927327	2.35213	0.048673	0.139253	0.976	2.14311
348	MTHFD1	C-1-tetrahydrofolate synthase, cytoplasmic;Methylenetetrahydrofolate dehydrogenase;Methenyltetrahydrofolate cyclohydrolase;Formyltetrahydrofolate synthetase;C-1-tetrahydrofolate synthase, cytoplasmic, N-terminally processed	P11586	P11586	FTHFS;THF_DHG_CYH;THF_DHG_CYH_C	34	34	34	36.1	36.1	36.1	101.56	0	278.94	3723400000	52	387	17.405	17.0423	16.0364	22.3904	22.0259	21.7986	22.1982	22.4591	22.7993	22.341	22.4232	22.4787	5.24375	2.66529	5.65766	2.7605	5.5864	2.30186	0.413918	0.779036	0.342656	0.744941	-0.0712624	0.139573
349	PRPS2	Ribose-phosphate pyrophosphokinase 2	P11908	P11908	Pribosyl_synth;Pribosyltran_N	8	3	2	30.8	15.1	11	34.769	0	18.801	118640000	16	26	16.482	16.4914	17.0387	15.3754	17.4011	15.7999	21.0866	19.6689	20.324	16.8205	19.1133	15.4268	0	NaN	3.68912	2.30059	0.449524	0.143779	4.16769	2.13227	0.928093	0.296468	-3.23959	1.09673
350	PABPC1;PABPC3	Polyadenylate-binding protein 1;Polyadenylate-binding protein 3	P11940;Q9H361	P11940;Q9H361;Q4VXU2;Q96DU9	PABP;RRM_1	29	29	19	40.6	40.6	27.2	70.67	0	323.31	7139700000	36	590	15.3663	16.1725	16.1409	23.8319	23.5755	23.2329	23.6323	23.5688	23.8596	23.3597	23.0771	23.6068	7.65356	4.25972	7.79368	3.39917	7.45464	4.03189	0.140127	0.280567	-0.198919	0.357441	-0.339045	0.838469
351	PCNA	Proliferating cell nuclear antigen	P12004	P12004	PCNA_C;PCNA_N	5	5	5	25.3	25.3	25.3	28.768	0	36.646	100730000	16	18	16.8462	16.3227	17.0791	19.8428	15.3166	18.8429	17.1923	18.4	18.905	19.4439	19.577	19.571	1.25143	0.338122	1.41649	1.03856	2.78132	2.29753	0.165056	0.036906	1.52988	0.419022	1.36483	0.942719
355	CKB	Creatine kinase B-type	P12277	P12277	ATP-gua_Ptrans;ATP-gua_PtransN	6	6	6	21.3	21.3	21.3	42.644	0	40.834	198510000	17	38	15.3355	16.9372	17.3962	19.4601	15.832	16.9232	17.4425	17.9349	19.455	17.462	16.4273	20.3095	0.848795	0.267031	1.72114	0.924058	1.50999	0.47705	0.872348	0.277226	0.661198	0.156431	-0.21115	0.054492
356	CKMT1A	Creatine kinase U-type, mitochondrial	P12532	P12532;P17540	ATP-gua_Ptrans;ATP-gua_PtransN	9	9	9	23.7	23.7	23.7	47.036	0	186.42	1532200000	20	133	16.2755	17.2326	16.8218	22.3042	22.1034	21.0839	23.4889	23.0349	23.2046	21.8422	21.3857	22.5473	5.05388	3.18433	6.46615	3.50576	5.14843	3.43654	1.41226	1.28442	0.094553	0.0649028	-1.31771	1.34319
357	XRCC6	X-ray repair cross-complementing protein 6	P12956	P12956	Ku;Ku_C;Ku_N;SAP	16	16	16	29.7	29.7	29.7	69.842	0	91.251	431220000	32	121	15.4067	14.9649	16.8621	20.5746	20.3583	20.1135	19.3521	19.9721	20.0059	20.0576	19.828	20.6653	4.60423	1.92821	4.03216	1.93349	4.43907	2.11005	-0.572072	1.01172	-0.165167	0.221935	0.406905	0.546526
358	XRCC5	X-ray repair cross-complementing protein 5	P13010	P13010	Ku;Ku_C;Ku_N;Ku_PK_bind	9	9	9	11.9	11.9	11.9	82.704	0	37.186	257800000	38	60	13.5734	16.0133	15.2361	20.1716	19.9675	19.7121	16.5403	19.126	19.3049	19.4557	19.4564	20.1125	5.00945	1.76043	3.38278	1.35281	4.73394	1.80093	-1.62668	0.681782	-0.275513	0.450788	1.35116	0.573935
360	VCAN	Versican core protein	P13611	P13611	EGF;Lectin_C;Sushi;V-set;Xlink	8	8	8	2.3	2.3	2.3	372.82	0	35.086	92882000	131	33	16.0436	15.0311	16.4466	18.0885	18.5165	18.0204	18.7669	18.6988	18.4783	18.2257	18.3849	17.8181	2.36801	1.69821	2.8076	1.7364	2.3025	1.69407	0.439587	1.06439	-0.0655187	0.1027	-0.505105	1.11617
361	EEF2	Elongation factor 2	P13639	P13639	EFG_C;EFG_II;EFG_IV;GTP_EFTU;GTP_EFTU_D2	37	37	36	39.4	39.4	38.2	95.337	0	323.31	47922000000	45	1345	17.521	21.1572	18.5278	26.1264	25.6409	25.3877	26.1307	25.8992	26.6148	25.508	25.9575	25.633	6.64964	1.65663	7.14625	1.7179	6.63081	1.61517	0.496614	0.754704	-0.0188255	0.0244208	-0.51544	0.918837
371	PKM	Pyruvate kinase PKM	P14618	P14618;P30613	PK;PK_C	12	12	12	27.7	27.7	27.7	57.936	0	69.874	254720000	33	61	17.1276	15.4648	16.0377	19.0811	16.8582	15.5928	16.9548	18.534	20.5423	17.3112	17.0575	20.6064	0.967314	0.339548	2.46699	0.901005	2.11501	0.705116	1.49967	0.442561	1.14769	0.304662	-0.35198	0.0804221
373	SNRPB;SNRPN	Small nuclear ribonucleoprotein-associated proteins B and B;Small nuclear ribonucleoprotein-associated protein N	P14678;P63162	P14678;P63162	LSM	7	7	7	27.1	27.1	27.1	24.61	0	57.632	1083500000	16	243	15.5799	16.2015	15.681	21.0913	21.2276	21.0702	22.2266	21.9002	21.6089	21.5914	21.4185	21.9782	5.3089	3.14878	6.09109	4.66862	5.84193	4.59541	0.78219	1.39647	0.533028	1.13109	-0.249163	0.438846
374	HNRNPL	Heterogeneous nuclear ribonucleoprotein L	P14866	P14866;M0QYT0;Q8WVV9		10	10	10	22.9	22.9	22.9	64.132	0	190.34	776100000	20	90	15.9252	16.0848	16.8186	22.5336	22.278	22.0033	19.7416	20.6309	20.7017	22.0723	21.5676	22.2125	5.99546	3.61524	4.08185	3.19951	5.67463	3.83442	-1.91361	1.90973	-0.32083	0.568517	1.59278	1.75955
375	DARS	Aspartate--tRNA ligase, cytoplasmic	P14868	P14868	tRNA_anti-codon;tRNA-synt_2	18	18	18	41.7	41.7	41.7	57.136	0	91.931	524340000	37	98	16.2734	15.7401	15.7096	20.3874	20.384	19.626	21.2064	20.5552	21.1353	20.8146	20.9191	20.939	4.22479	3.51798	5.05794	4.2396	4.9832	3.0525	0.833152	1.18219	0.758408	1.03383	-0.0747445	0.12276
376	JUP	Junction plakoglobin	P14923	P14923	Arm	9	9	9	13.8	13.8	13.8	81.744	0	31.173	99300000	46	21	24.3629	24.4262	24.3856	16.8686	16.8761	17.4444	17.5843	17.4309	16.4633	15.1622	16.4353	16.7385	-7.32854	3.21476	-7.23204	2.63998	-8.27958	2.47546	0	NaN	0	NaN	0	NaN
382	RPS2	40S ribosomal protein S2	P15880	P15880	Ribosomal_S5;Ribosomal_S5_C	15	15	15	45.4	45.4	45.4	31.324	0	173.86	21316000000	18	438	16.7578	21.1777	16.9991	26.1204	26.0702	25.4477	26.8485	26.7821	26.6737	25.9474	25.9465	26.0776	7.56789	1.49893	8.45656	1.56111	7.67894	1.48042	0.888669	1.3189	0.111052	0.17951	-0.777617	3.44375
383	DSP	Desmoplakin	P15924	P15924	Plectin	28	28	28	8.5	8.5	8.5	331.77	0	76.843	152660000	163	80	22.2458	20.4851	20.3721	18.7102	18.4877	18.0802	18.5515	19.3368	18.2012	19.4399	18.4995	19.2178	-2.60833	1.39296	-2.33786	1.38861	-1.98198	1.19448	0.270466	0.27618	0.626352	0.825112	0.355886	0.332765
384	RPA2	Replication protein A 32 kDa subunit	P15927	P15927	RPA_C;tRNA_anti-codon	3	3	3	12.6	12.6	12.6	29.247	0	9.3183	84427000	10	23	16.7368	16.0172	16.3726	19.2493	18.959	19.7434	16.9398	18.8294	16.1616	19.3171	19.7783	19.4467	2.94172	3.14725	0.934772	0.444219	3.13853	3.29188	-2.00695	0.930231	0.196809	0.292158	2.20375	0.980924
388	YBX3	Y-box-binding protein 3	P16989	P16989	CSD	15	11	11	65.3	54.6	54.6	40.089	0	220.48	837220000	13	88	17.9572	20.4579	19.0672	20.7454	21.5209	21.4377	19.6271	17.9634	19.0343	23.1941	23.0539	22.2779	2.07387	1.04236	-0.285884	0.11824	3.68117	1.61346	-2.35975	1.6302	1.6073	1.86844	3.96706	2.33381
389	HSPA6;HSPA7	Heat shock 70 kDa protein 6;Putative heat shock 70 kDa protein 7	P17066;P48741	P17066;P48741	HSP70	7	1	1	12.9	1.7	1.7	71.027	0	16.916	2595300000	37	34	16.4552	15.8031	17.0044	16.8737	24.8304	24.2965	17.1084	25.0308	24.3166	24.5237	25.2438	25.2779	5.57928	0.796784	5.73104	0.82572	8.59426	4.1123	0.151766	0.0139283	3.01498	0.442363	2.86322	0.425782
391	UBTF	Nucleolar transcription factor 1	P17480	P17480	HMG_box;HMG_box_2;HMG_box_5	6	6	6	7.5	7.5	7.5	89.405	0	17.982	120700000	34	35	16.1925	17.9801	17.0953	19.3703	20.1757	19.0167	15.3914	18.471	18.1129	19.6794	19.8525	18.6413	2.43162	1.64973	0.235846	0.0737052	2.30179	1.57837	-2.19577	0.849644	-0.129823	0.0904838	2.06595	0.805966
393	DDX5	Probable ATP-dependent RNA helicase DDX5	P17844	P17844	DEAD;Helicase_C;P68HR	23	22	16	34.7	32.9	22.6	69.147	0	100.83	1303400000	32	205	17.2621	17.141	17.5103	22.0488	22.1126	21.3231	21.3156	21.7687	22.0648	22.221	21.9855	22.2565	4.52371	3.06754	4.4119	3.38119	4.84987	5.17059	-0.111817	0.122058	0.326157	0.485937	0.437974	0.764461
394	TCP1	T-complex protein 1 subunit alpha	P17987	P17987	Cpn60_TCP1	19	19	19	34.2	34.2	34.2	60.343	0	73.937	832240000	31	166	17.0571	16.3577	16.6539	20.6132	20.8245	20.5108	19.7268	20.4915	20.6835	21.1265	21.1433	21.4566	3.95995	3.23429	3.61105	3.0291	4.55258	3.59002	-0.348897	0.448666	0.592632	1.83805	0.941529	1.1531
395	RPL35A	60S ribosomal protein L35a	P18077	P18077	Ribosomal_L35Ae	7	7	7	35.5	35.5	35.5	12.538	0	33.608	12710000000	7	224	17.7255	22.6362	17.3349	25.6888	25.8225	25.3343	24.5765	26.1404	26.1033	26.0479	25.8801	25.3063	6.383	1.19679	6.37451	1.26354	6.51259	1.22225	-0.00849597	0.00497833	0.12959	0.182101	0.138086	0.0844956
396	RPL7	60S ribosomal protein L7	P18124	P18124	Ribosomal_L30;Ribosomal_L30_N	18	18	18	48.8	48.8	48.8	29.225	0	231.7	36229000000	12	660	17.8941	20.803	17.3388	26.433	26.4158	25.8692	26.8662	26.4639	27.0332	26.4797	25.8592	25.8649	7.56069	1.76245	8.10912	1.81549	7.38925	1.75428	0.548431	1.02487	-0.171438	0.244385	-0.719869	1.25077
402	NCL	Nucleolin	P19338	P19338	RRM_1	23	23	23	28.9	28.9	28.9	76.613	0	215.65	11426000000	35	346	18.4779	22.5442	18.4451	25.5612	25.6247	25.2867	21.3729	21.9384	22.4363	25.7556	25.5191	25.0178	5.6685	1.28127	2.09352	0.58314	5.60846	1.29306	-3.57498	2.42131	-0.0600389	0.0861644	3.51494	2.92505
403	POLR2C	DNA-directed RNA polymerase II subunit RPB3	P19387	P19387	RNA_pol_A_bac;RNA_pol_L	2	2	2	6.5	6.5	6.5	31.441	0	7.8474	123820000	14	15	16.6015	14.638	15.4297	19.5494	20.0642	20.3286	17.0636	19.6798	16.315	20.1706	20.6372	19.9603	4.42431	2.07177	2.12972	0.790949	4.69962	2.07741	-2.29459	0.830708	0.275314	0.379796	2.5699	0.90986
404	POLR2E	DNA-directed RNA polymerases I, II, and III subunit RPABC1	P19388	P19388	RNA_pol_Rpb5_C;RNA_pol_Rpb5_N	5	5	5	24.3	24.3	24.3	24.551	0	20.694	101340000	11	28	17.1848	17.7648	15.4371	19.4751	19.8541	19.3686	18.4771	18.2233	17.9291	19.9214	19.8695	19.6092	2.77038	1.2773	1.41427	0.755836	3.00445	1.32068	-1.35611	2.47372	0.234067	0.576742	1.59017	2.6432
406	CSNK2A2	Casein kinase II subunit alpha	P19784	P19784	Pkinase	4	4	4	14.9	14.9	14.9	41.213	0	15.79	245770000	19	36	17.6452	15.791	17.3548	20.2991	20.4873	19.9176	20.495	19.8971	19.6968	20.3587	20.2491	20.1447	3.30431	1.65771	3.09931	1.68898	3.32051	1.55886	-0.205006	0.278773	0.0161947	0.0294539	0.221201	0.340762
407	EIF2S2	Eukaryotic translation initiation factor 2 subunit 2	P20042	P20042	eIF-5_eIF-2B	14	14	14	43.5	43.5	43.5	38.388	0	125.26	560400000	20	92	15.3805	16.3919	16.3704	20.8285	20.6375	21.6335	21.1665	21.0585	21.0911	20.204	20.1257	20.7698	4.98553	3.39673	5.05777	2.39322	4.31883	2.99522	0.0722332	0.0781126	-0.666704	0.813481	-0.738937	1.1904
415	NF1	Neurofibromin;Neurofibromin truncated	P21359	P21359	CRAL_TRIO_2;RasGAP	6	6	6	2.6	2.6	2.6	319.37	0	23.019	36975000	140	19	17.652	16.8578	15.7874	18.2353	17.7177	18.032	18.3626	17.6691	17.9057	18.107	18.2846	18.0695	1.22929	0.846226	1.21344	0.847996	1.38801	0.914132	-0.0158564	0.020767	0.158715	0.385446	0.174571	0.312216
417	PCMT1	Protein-L-isoaspartate(D-aspartate) O-methyltransferase	P22061	P22061	PCMT	4	4	4	13.2	13.2	13.2	24.636	0	13.885	122070000	12	31	21.0072	23.139	21.4763	20.1853	19.8393	19.8879	15.1023	15.6478	19.1522	16.8915	20.9332	20.8084	-1.90331	1.02304	-5.24002	1.4523	-2.32976	0.666136	-3.33671	0.927205	-0.42645	0.108608	2.91026	0.725262
424	HNRNPA2B1	Heterogeneous nuclear ribonucleoproteins A2/B1	P22626	P22626	RRM_1	10	10	10	31.2	31.2	31.2	37.429	0	78.265	1133700000	20	130	15.7605	15.3505	14.807	21.4027	21.6664	20.7998	19.417	19.9873	20.4695	22.7594	21.9568	22.1857	5.98364	4.02025	4.65193	3.4379	6.99467	4.29225	-1.33171	1.52426	1.01103	1.34637	2.34274	2.34995
426	SFPQ	Splicing factor, proline- and glutamine-rich	P23246	P23246	NOPS;RRM_1	19	18	18	30.6	29.4	29.4	76.149	0	216.6	3997200000	30	269	16.9217	16.9617	16.4568	24.6003	25.026	24.384	22.9673	23.85	23.5773	24.5644	24.6569	24.6234	7.89001	5.13883	6.68478	3.99199	7.83482	3.51135	-1.20523	1.6248	-0.0551879	0.0977856	1.15004	1.33276
427	PPIB	Peptidyl-prolyl cis-trans isomerase B	P23284	P23284	Pro_isomerase	10	10	10	47.2	47.2	47.2	23.742	0	83.974	548740000	12	119	21.1588	23.1914	21.7054	21.3561	21.1343	20.5463	20.8048	20.4556	20.6899	20.9128	20.7319	21.2684	-1.00627	0.630641	-1.36842	0.825367	-1.0475	0.653543	-0.362153	0.567238	-0.0412292	0.0485131	0.320924	0.757657
428	RPS3	40S ribosomal protein S3	P23396	P23396	KH_2;Ribosomal_S3_C	20	20	20	68.7	68.7	68.7	26.688	0	201.8	27369000000	19	675	17.4346	20.0902	17.4012	25.5299	26.0261	25.729	26.1478	26.5347	26.4662	26.1796	25.8175	26.0657	7.45301	1.90991	8.07426	1.96313	7.71231	1.91509	0.621247	1.50982	0.259301	0.642509	-0.361946	1.05839
431	EIF4B	Eukaryotic translation initiation factor 4B	P23588	P23588	RRM_1	9	9	9	15.4	15.4	15.4	69.15	0	58.707	285370000	27	30	16.7156	16.2254	16.2834	20.6382	21.0435	20.2029	16.222	21.0163	19.029	21.9669	22.0563	22.1432	4.22005	3.46221	2.34762	0.63376	5.6473	3.60703	-1.87243	0.509386	1.42725	1.62457	3.29968	0.851304
435	MCM3	DNA replication licensing factor MCM3	P25205	P25205	MCM;MCM_N	5	5	5	6.7	6.7	6.7	90.98	0	13.872	37102000	51	20	15.3989	15.8486	16.6894	17.4062	18.1931	17.083	17.2256	17.2401	17.1359	17.1769	17.0356	18.1143	1.58182	1.45214	1.22159	1.08154	1.46329	1.34174	-0.360231	0.410546	-0.118525	0.0892234	0.241706	0.25985
437	RPS12	40S ribosomal protein S12	P25398	P25398	Ribosomal_L7Ae	9	9	9	74.2	74.2	74.2	14.515	0	82.297	6038100000	7	221	16.601	20.2433	15.6421	24.6862	24.2646	22.5737	23.8507	24.5643	25.1119	23.6143	22.8815	23.5691	6.34604	1.53081	7.0135	1.50873	5.85946	1.30821	0.667463	0.365161	-0.486584	0.268604	-1.15405	1.17535
441	PSMA1	Proteasome subunit alpha type-1	P25786	P25786;B4DEV8	Proteasome;Proteasome_A_N	6	6	6	20.9	20.9	20.9	29.555	0	36.203	103180000	17	31	17.7955	16.5574	16.3083	16.2811	16.0106	16.7702	20.1719	18.8924	18.6827	18.6024	19.1127	20.0362	0	NaN	2.36195	1.64659	2.3634	1.71098	2.89505	1.89947	2.8965	2.07008	0.0014534	0.000755644
443	PSMA3	Proteasome subunit alpha type-3	P25788	P25788	Proteasome;Proteasome_A_N	4	4	4	19.2	19.2	19.2	28.433	0	16.745	91238000	13	16	16.2434	16.093	15.9563	20.0723	19.1498	18.7146	17.1911	15.3494	18.5994	18.2892	16.4747	19.8923	3.21467	1.9065	0.949045	0.377314	2.1212	0.785663	-2.26563	0.908884	-1.09347	0.409637	1.17215	0.357887
444	PSMA4	Proteasome subunit alpha type-4	P25789	P25789	Proteasome;Proteasome_A_N	4	4	4	13.4	13.4	13.4	29.483	0	10.454	91235000	13	20	14.6196	17.6704	16.5489	19.2224	18.7456	16.5964	15.3228	18.3641	19.0731	18.853	18.2045	18.8324	1.90853	0.725008	1.30708	0.373938	2.35033	0.952349	-0.601443	0.159178	0.441805	0.191147	1.04325	0.335957
445	DDX6	Probable ATP-dependent RNA helicase DDX6	P26196	P26196	DEAD;Helicase_C	17	17	17	42.2	42.2	42.2	54.416	0	287.16	974610000	28	144	17.3042	16.8847	16.9183	21.4491	21.3664	20.7892	21.0226	21.3335	21.6436	20.9698	20.4642	21.5224	4.16584	3.69198	4.29748	4.12175	3.94974	2.71059	0.131638	0.182564	-0.216105	0.226254	-0.347742	0.404523
446	U2AF2	Splicing factor U2AF 65 kDa subunit	P26368	P26368	RRM_1	5	5	5	11.4	11.4	11.4	53.5	0	10.955	1528100000	15	24	15.5017	16.4995	17.2941	23.8188	23.8197	23.7934	22.0476	24.1239	23.9333	23.7844	24.7968	24.4376	7.37887	2.31046	6.9365	2.82426	7.90782	3.16208	-0.442368	0.241755	0.528947	0.665313	0.971315	0.552668
447	RPL13	60S ribosomal protein L13	P26373	P26373	Ribosomal_L13e	11	11	11	41.2	41.2	41.2	24.261	0	203.1	32208000000	9	305	17.5518	15.1653	16.9932	27.3474	27.2468	26.8458	27.6747	28.0791	28.118	27.3753	27.6729	27.1891	10.5766	2.47318	11.3872	2.52249	10.8423	2.47559	0.810617	1.74503	0.265772	0.566695	-0.544845	1.27864
449	PTBP1	Polypyrimidine tract-binding protein 1	P26599	P26599	RRM_1	2	2	2	4.5	4.5	4.5	57.221	0	8.2219	67688000	19	15	16.4634	15.9416	16.8666	16.5256	19.782	15.4103	17.5655	15.7669	15.8724	19.5465	19.4874	20.5298	0.815405	0.221724	0	NaN	3.43072	2.7773	-0.837648	0.219193	2.61532	0.749263	3.45297	1.91474
451	VARS	Valine--tRNA ligase	P26640	P26640	Anticodon_1;GST_C;GST_N;tRNA-synt_1	6	6	6	6.7	6.7	6.7	140.47	0	23.938	38290000	59	19	16.611	15.9808	16.0722	18.3249	17.8437	17.2853	16.3439	16.1459	17.8614	18.0777	17.9368	18.6605	1.59658	1.80436	0.56238	0.383589	2.00365	2.58171	-1.0342	0.721132	0.407068	0.466407	1.44127	0.991757
452	EEF1G	Elongation factor 1-gamma	P26641	P26641	EF1G;GST_C;GST_N	9	9	9	17.2	17.2	17.2	50.118	0	64.29	463320000	24	62	16.4519	15.9702	16.3222	21.1209	20.626	20.7051	19.0276	19.6331	20.9555	20.5652	20.5005	20.5663	4.56923	4.56098	3.62396	1.72715	4.29587	3.04863	-0.945272	0.63021	-0.273361	0.667629	0.671911	0.444674
453	YWHAQ	14-3-3 protein theta	P27348	P27348	14-3-3	11	8	8	38	26.9	26.9	27.764	0	126.43	908090000	14	73	15.4679	16.3231	16.3993	22.1806	22.1145	21.6631	22.5942	21.8719	21.829	22.8612	22.9856	22.6642	5.92261	3.46147	6.03491	3.90542	6.77355	3.07218	0.1123	0.138326	0.850945	1.75653	0.738645	1.08406
455	MARK3	MAP/microtubule affinity-regulating kinase 3	P27448	P27448;Q96L34	KA1;Pkinase	10	7	5	17.9	13.4	10.9	84.428	0	105.44	209970000	41	44	16.1885	16.339	15.8558	19.3803	19.4449	19.9675	19.2516	18.6042	18.9785	19.6292	19.5935	19.0464	3.46982	3.73792	2.81704	3.38472	3.29528	3.62296	-0.652783	1.16211	-0.174543	0.262926	0.47824	0.833691
456	RPL10	60S ribosomal protein L10	P27635	P27635;Q96L21	Ribosomal_L16	9	9	9	29.9	29.9	29.9	24.604	0	79.708	4715100000	8	219	16.8934	16.4209	17.8562	23.9464	24.7608	24.9103	24.7925	24.9329	24.8557	24.991	24.5587	24.5623	7.48234	3.59559	7.80352	2.56749	7.64717	2.89139	0.321178	0.402389	0.164835	0.183654	-0.156343	0.407502
457	RPA1	Replication protein A 70 kDa DNA-binding subunit;Replication protein A 70 kDa DNA-binding subunit, N-terminally processed	P27694	P27694	Rep_fac-A_C;Rep-A_N;tRNA_anti-codon	11	11	11	18.2	18.2	18.2	68.137	0	53.711	282160000	30	68	16.0045	17.6257	15.1293	20.458	20.3772	20.9245	19.9973	19.5668	19.6773	19.8512	20.1827	20.0321	4.3334	1.64662	3.49395	1.42462	3.76884	1.47158	-0.839448	1.70591	-0.56456	1.22422	0.274888	0.773618
463	PSMB4	Proteasome subunit beta type-4	P28070	P28070	Proteasome	3	3	3	12.9	12.9	12.9	29.204	0	9.2245	71123000	11	19	16.4624	19.571	17.5004	19.1918	18.9416	19.3546	15.4551	16.8556	19.3857	16.5912	19.4547	19.7045	1.31804	0.545118	-0.612442	0.155417	0.73888	0.211548	-1.93048	0.630136	-0.579161	0.206562	1.35132	0.370531
464	PSMB6	Proteasome subunit beta type-6	P28072	P28072	Proteasome	3	3	3	13	13	13	25.357	0	7.2527	97224000	11	14	17.8592	16.5126	15.295	16.2834	16.5729	17.0947	16.2495	16.2442	19.6276	19.262	19.0435	20.2568	0	NaN	0.818175	0.235384	2.96518	1.41648	0.723442	0.229561	2.87045	2.29542	2.14701	0.723063
465	PSMB5	Proteasome subunit beta type-5	P28074	P28074	Proteasome	3	3	3	14.4	14.4	14.4	28.48	0	15.976	61252000	15	16	15.618	15.8408	16.8624	15.294	16.3159	16.9652	16.7341	19.2526	18.7496	19.0612	19.905	19.9314	0	NaN	2.13835	1.04303	3.52543	2.61438	2.05378	1.00275	3.44086	2.14869	1.38708	0.686503
466	ABCD3	ATP-binding cassette sub-family D member 3	P28288	P28288	ABC_membrane_2;ABC_tran	10	10	10	13.8	13.8	13.8	75.475	0	33.438	151300000	40	55	16.8283	15.5818	15.7684	19.3527	19.151	19.1291	15.9632	19.1139	17.8451	19.0962	19.2589	18.7838	3.15145	1.89811	1.58125	0.657719	2.9868	2.01537	-1.57021	0.642405	-0.164653	0.431047	1.40555	0.580138
470	TPP2	Tripeptidyl-peptidase 2	P29144	P29144	Peptidase_S8;TPPII	7	7	7	7.1	7.1	7.1	138.35	0	25.169	64756000	63	18	16.046	16.639	16.0197	17.957	18.2439	18.892	18.1062	18.9416	18.6172	18.9211	18.3325	18.0504	2.1294	2.34271	2.32008	2.68075	2.1998	2.51471	0.190687	0.199058	0.0704009	0.0649643	-0.120286	0.124487
475	EEF1D	Elongation factor 1-delta	P29692	P29692	EF-1_beta_acid;EF1_GNE	9	9	8	41.3	41.3	37.4	31.121	0	94.243	263250000	16	62	16.0314	15.7215	17.3979	19.4626	19.3433	19.0578	16.148	19.4489	19.998	20.3327	19.6538	20.4273	2.90433	1.60136	2.14803	0.680526	3.75436	2.08092	-0.756301	0.226083	0.850027	1.26725	1.60633	0.505682
476	MARCKS	Myristoylated alanine-rich C-kinase substrate	P29966	P29966	MARCKS	6	6	6	30.7	30.7	30.7	31.554	0	32.321	51484000	14	16	16.1702	17.8729	17.9548	19.0786	18.8217	18.4	17.0424	17.7954	17.8443	15.519	15.8534	19.0583	1.43414	0.917261	0	NaN	-0.522418	0.149754	-1.2061	1.62784	-1.95656	0.652754	-0.750461	0.238309
479	RPL12	60S ribosomal protein L12	P30050	P30050	Ribosomal_L11;Ribosomal_L11_N	10	10	10	73.3	73.3	73.3	17.818	0	292.29	13734000000	9	316	16.924	20.0768	16.2845	25.2231	25.402	24.5923	25.7416	25.7018	25.6475	25.1307	24.7655	25.0479	7.31068	1.6776	7.93518	1.67608	7.21958	1.61063	0.624495	0.905337	-0.0911013	0.119705	-0.715596	1.73781
482	PPP2R1A	Serine/threonine-protein phosphatase 2A 65 kDa regulatory subunit A alpha isoform	P30153	P30153	HEAT	9	9	9	16.8	16.8	16.8	65.308	0	25.738	158850000	32	53	15.8417	19.9854	16.6292	19.3519	19.0971	19.3125	19.436	19.8362	19.4427	19.3301	19.3102	18.7936	1.76841	0.525291	2.0862	0.617248	1.6592	0.493526	0.317786	0.907177	-0.109214	0.212332	-0.426999	0.887777
486	POLR2B	DNA-directed RNA polymerase II subunit RPB2	P30876	P30876	RNA_pol_Rpb2_1;RNA_pol_Rpb2_2;RNA_pol_Rpb2_3;RNA_pol_Rpb2_4;RNA_pol_Rpb2_5;RNA_pol_Rpb2_6;RNA_pol_Rpb2_7	15	15	15	14.2	14.2	14.2	133.9	0	46.428	272700000	59	63	16.3399	15.5119	17.0732	20.4355	20.1317	19.9944	20.0246	20.0518	19.9563	20.2149	20.3812	20.6504	3.87887	2.05026	3.70257	1.84671	4.10716	2.09799	-0.176305	0.512246	0.228286	0.556238	0.404591	1.10031
491	DNAJA1	DnaJ homolog subfamily A member 1	P31689	P31689	CTDII;DnaJ;DnaJ_CXXCXGXG	6	6	6	18.4	18.4	18.4	44.868	0	18.376	59124000	21	17	15.2354	16.2308	16.5619	16.8152	17.0888	16.6088	16.9875	18.5323	18.7962	18.5888	18.4748	18.9944	0	NaN	2.09598	1.35355	2.67665	1.90889	1.26775	0.832828	1.84843	3.00447	0.580676	0.383311
494	HNRNPH1	Heterogeneous nuclear ribonucleoprotein H;Heterogeneous nuclear ribonucleoprotein H, N-terminally processed	P31943	P31943;P55795	zf-RNPHF	9	9	8	25.2	25.2	22.9	49.229	0	74.352	533480000	18	108	17.335	15.8957	16.3135	21.4187	21.3511	20.962	21.1758	20.9926	21.3525	21.1935	20.6641	21.3449	4.72919	2.36135	4.65889	2.22787	4.55273	2.5489	-0.070303	0.147486	-0.17646	0.279924	-0.106157	0.168992
495	CASP14	Caspase-14;Caspase-14 subunit p17, mature form;Caspase-14 subunit p10, mature form;Caspase-14 subunit p20, intermediate form;Caspase-14 subunit p8, intermediate form	P31944	P31944	Peptidase_C14	3	3	3	12	12	12	27.679	0	10.785	13908000	15	13	20.8704	20.5515	19.8923	15.9459	16.5424	16.0448	15.7069	17.4494	14.7857	16.2222	17.4517	15.6712	-4.26038	3.23278	-4.45741	1.71328	-3.98971	2.20387	0	NaN	0	NaN	0	NaN
496	YWHAB	14-3-3 protein beta/alpha;14-3-3 protein beta/alpha, N-terminally processed	P31946	P31946	14-3-3	11	6	6	53.3	35.8	35.8	28.082	0	103.85	1892700000	14	72	16.1392	16.1846	16.4192	23.2036	22.7313	20.0328	18.8387	22.1524	22.1633	25	25.1262	24.0727	5.74158	1.55977	4.8038	1.31536	8.48531	3.08393	-0.937779	0.250311	2.74373	1.01483	3.68151	1.15983
498	STIP1	Stress-induced-phosphoprotein 1	P31948	P31948	TPR_1;TPR_8	13	13	13	23	23	23	62.639	0	46.555	195380000	35	58	16.344	16.5271	16.0793	19.5914	19.2336	19.4745	19.1672	19.16	19.4141	19.2081	18.9156	20.0381	3.11635	4.17731	2.93028	3.85191	3.07044	2.23261	-0.186071	0.616199	-0.0459156	0.0426446	0.140156	0.142006
500	ARRB2	Beta-arrestin-2	P32121	P32121	Arrestin_C;Arrestin_N	8	8	8	20	20	20	46.105	0	21.662	69089000	21	26	15.1788	15.3038	15.8221	17.9506	16.7222	17.3404	18.7587	18.1087	18.3746	18.0074	18.4834	18.9172	1.90285	1.77753	2.97909	3.39487	3.03442	2.96574	1.07623	1.13187	1.13157	1.17037	0.0553315	0.0588463
501	PYCR1	Pyrroline-5-carboxylate reductase 1, mitochondrial	P32322	P32322	F420_oxidored;P5CR_dimer	13	13	12	45.8	45.8	41.7	33.36	0	323.31	3254400000	15	260	15.185	15.2212	17.1868	23.4377	23.2054	22.2995	23.8906	23.5024	23.4511	23.0514	22.654	23.8215	7.11652	2.62525	7.75035	2.25923	7.31129	2.6495	0.63383	0.695539	0.194775	0.148666	-0.439056	0.480343
504	RPL9	60S ribosomal protein L9	P32969	P32969	Ribosomal_L6	7	7	7	36.5	36.5	36.5	21.863	0	96.156	6527900000	9	285	16.676	17.4763	17.1574	24.0152	23.7996	23.3031	23.5299	24.6379	25.2928	24.1553	23.6769	23.8792	6.60274	4.48725	7.38363	2.85653	6.80059	4.1193	0.780897	0.575434	0.19785	0.315887	-0.583047	0.42538
514	RFC4	Replication factor C subunit 4	P35249	P35249	AAA;Rep_fac_C	8	8	8	22.9	22.9	22.9	39.681	0	49.137	470240000	19	65	16.7007	16.0793	17.6702	21.296	21.2405	20.7926	21.6453	20.9125	21.3673	21.3467	20.876	21.5734	4.29293	2.19301	4.49161	2.40512	4.44863	2.36879	0.198687	0.300643	0.155701	0.234063	-0.0429853	0.049791
515	RFC2	Replication factor C subunit 2	P35250	P35250	AAA;Rep_fac_C	10	10	10	29.9	29.9	29.9	39.157	0	66.014	576310000	22	85	16.916	16.8717	16.8538	20.8867	20.7927	20.5672	21.2642	20.2454	20.66	20.7536	20.6154	20.4142	3.86833	3.40447	3.84267	2.2424	3.71387	3.31733	-0.0256538	0.0266175	-0.154452	0.492299	-0.128798	0.146848
516	RFC1	Replication factor C subunit 1	P35251	P35251	AAA;BRCT;RFC1	22	22	22	23.2	23.2	23.2	128.25	0	248.59	930880000	57	151	16.4351	16.9462	15.8787	21.0062	21.0158	20.8431	21.1375	20.6874	20.3589	20.64	20.7243	20.7216	4.53504	2.43931	4.3079	3.25086	4.2753	2.3117	-0.227138	0.374829	-0.259739	1.57437	-0.032601	0.0463432
517	RPL22	60S ribosomal protein L22	P35268	P35268	Ribosomal_L22e	6	6	6	42.2	42.2	42.2	14.787	0	147.92	15066000000	4	155	15.9081	21.985	15.8282	26.1333	26.0732	25.5596	26.8845	26.5751	26.5381	26.1016	25.9236	25.7383	8.01493	1.23678	8.7588	1.30298	8.01407	1.23138	0.743872	1.46562	-0.000857035	0.0013106	-0.744729	2.09358
518	GTF2F1	General transcription factor IIF subunit 1	P35269	P35269	TFIIF_alpha	4	4	4	12.2	12.2	12.2	58.24	0	19.788	22576000	20	11	17.3286	16.7984	16.6454	18.4591	19.2035	18.1736	15.8522	17.4381	15.0686	16.5476	16.14	16.4021	1.68789	1.85372	0	NaN	0	NaN	-2.4924	1.27636	-2.24882	1.99525	0	NaN
519	MYH9	Myosin-9	P35579	P35579	IQ;Myosin_head;Myosin_N;Myosin_tail_1	16	16	14	9.3	9.3	7.8	226.53	0	63.215	111610000	104	55	16.3726	16.4896	15.1409	18.5696	18.581	18.0952	16.2049	17.6228	18.2694	17.8935	17.9108	18.4314	2.41427	1.69494	1.3647	0.82518	2.07753	1.56624	-1.04957	0.652435	-0.336738	0.636258	0.712828	0.439362
520	MYH10	Myosin-10	P35580	P35580	IQ;Myosin_head;Myosin_N;Myosin_tail_1	12	11	10	7.9	7.2	6.7	229	0	34.094	50719000	102	29	17.6332	16.4257	16.1856	18.1241	18.266	17.9284	17.9653	17.5847	17.8297	18.4211	18.5008	18.1628	1.35802	1.05787	1.04507	0.860645	1.61341	1.20291	-0.312955	0.984926	0.255383	0.837879	0.568338	1.69885
521	COPB2	Coatomer subunit beta	P35606	P35606	Coatomer_WDAD;WD40	11	11	11	15.5	15.5	15.5	102.49	0	35.4	111470000	48	41	17.0367	16.5425	16.4244	18.7811	18.4318	17.6967	15.5445	18.9586	18.8006	18.8259	18.5598	18.9696	1.63534	1.73383	1.1	0.368894	2.11725	2.84147	-0.535336	0.165293	0.481907	0.572497	1.01724	0.339682
522	FUS	RNA-binding protein FUS	P35637	P35637	RRM_1;zf-RanBP	7	7	5	15.8	15.8	14.1	53.425	0	106.4	1653000000	13	115	16.0374	17.5879	15.6496	23.621	23.0973	23.6706	21.1386	20.9594	20.9016	24.5264	24.3432	24.1152	7.03798	2.40134	4.5749	1.81591	7.9033	2.37048	-2.46309	2.66163	0.865316	1.64933	3.3284	4.06768
527	RPL4	60S ribosomal protein L4	P36578	P36578	Ribos_L4_asso_C;Ribosomal_L4	22	22	22	41.2	41.2	41.2	47.697	0	294.17	14375000000	16	687	16.1715	21.01	15.5705	24.7113	24.8477	24.4264	24.8117	25.4595	25.6543	24.8158	24.4695	24.8209	7.07777	1.27	7.72449	1.36028	7.11805	1.27389	0.646711	0.959673	0.0402788	0.0838239	-0.606432	0.901969
529	SRP14	Signal recognition particle 14 kDa protein	P37108	P37108	SRP14	4	4	4	27.2	27.2	27.2	14.57	0	57.938	652030000	7	45	15.399	16.4883	17.6984	22.818	22.3343	16.5556	20.4178	21.5977	21.0754	23.722	23.3012	22.5154	4.04073	0.760272	4.50171	2.03365	6.65098	2.54352	0.460983	0.0750847	2.61025	0.490596	2.14926	1.92188
534	RBMX	RNA-binding motif protein, X chromosome;RNA-binding motif protein, X chromosome, N-terminally processed	P38159	P38159;O75526;Q8N7X1	RBM1CTR;RRM_1	15	15	6	37.6	37.6	10.5	42.331	0	154.88	1946700000	25	159	15.8971	16.1225	14.6738	21.8279	21.8732	21.6654	22.96	22.937	23.3307	22.9391	22.5202	22.5348	6.22435	2.34357	7.51144	2.70254	7.10026	2.68273	1.28709	2.49971	0.875914	1.91315	-0.411181	1.02856
535	COIL	Coilin	P38432	P38432		8	8	8	16.8	16.8	16.8	62.608	0	36.377	78345000	26	29	16.2663	15.4395	16.7481	18.0074	18.2532	18.2924	19.184	18.7673	18.2075	18.1876	18.1075	17.8602	2.03307	1.54852	2.56835	2.14522	1.90048	1.50157	0.535283	0.717396	-0.132589	0.425485	-0.667871	0.883889
537	HSPA9	Stress-70 protein, mitochondrial	P38646	P38646	HSP70	16	16	16	29.9	29.9	29.9	73.68	0	156.9	603780000	38	112	15.6563	16.8699	16.7285	20.2626	20.2098	19.4128	20.4082	20.3059	20.6332	20.1241	19.9682	20.8796	3.54348	2.61018	4.03083	2.20475	3.90572	2.76569	0.487355	0.674856	0.362243	0.387964	-0.125112	0.14994
538	EIF4A3	Eukaryotic initiation factor 4A-III;Eukaryotic initiation factor 4A-III, N-terminally processed	P38919	P38919	DEAD;Helicase_C	10	8	8	22.6	20.7	20.7	46.871	0	42.686	203940000	23	38	17.2466	17.214	16.5663	20.0713	19.7103	19.4105	19.1714	18.7362	18.9604	20.4825	20.3057	19.7614	2.72174	3.08548	1.94702	2.4159	3.17424	3.28859	-0.774724	1.46193	0.452495	0.712804	1.22722	1.85525
540	RPS19	40S ribosomal protein S19	P39019	P39019	Ribosomal_S19e	11	11	11	57.9	57.9	57.9	16.06	0	62.573	20298000000	10	276	21.3694	24.136	15.9862	26.4065	26.9915	27.157	27.2616	27.1095	26.9195	27.0246	27.3498	26.6891	6.35444	0.935306	6.59962	0.959002	6.52395	0.953157	0.245178	0.395125	0.169509	0.222148	-0.075669	0.126118
541	RPL3	60S ribosomal protein L3	P39023	P39023;Q92901	Ribosomal_L3	19	19	19	39.5	39.5	39.5	46.108	0	304.81	23023000000	19	506	17.2745	21.0976	19.8201	26.1228	26.0975	26.0873	26.0889	26.0176	26.0153	25.7697	26.0041	25.2882	6.70517	1.56952	6.64322	1.56238	6.28994	1.56797	-0.061952	0.963768	-0.415233	0.727522	-0.353281	0.629826
545	CCT6A	T-complex protein 1 subunit zeta	P40227	P40227	Cpn60_TCP1	14	14	9	25.8	25.8	16.8	58.024	0	61.472	744520000	26	110	17.5239	18.3423	16.823	21.0797	21.0227	20.6403	20.1801	20.5784	21.0227	21.396	21.5771	21.8025	3.35115	1.95847	3.03065	2.09097	4.02879	2.09026	-0.320502	0.480062	0.677633	1.6767	0.998135	1.4345
546	RPL13A	60S ribosomal protein L13a	P40429	P40429;Q6NVV1	Ribosomal_L13	10	10	10	38.9	38.9	38.9	23.577	0	103.48	17281000000	9	467	16.1173	22.0211	16.6879	26.4499	26.3697	26.2087	26.806	26.8893	26.99	26.5593	26.2191	26.0807	8.06731	1.30045	8.61963	1.35333	8.01092	1.2996	0.552317	2.36349	-0.0563876	0.126888	-0.608705	1.42612
548	MDH2	Malate dehydrogenase, mitochondrial	P40926	P40926	Ldh_1_C;Ldh_1_N	10	10	10	35.5	35.5	35.5	35.503	0	32.531	96098000	21	34	17.2039	16.9485	15.0822	19.1448	16.9788	16.7442	17.8015	16.3216	19.6548	17.5696	18.1481	20.2216	1.21106	0.522891	1.51442	0.561888	2.23488	0.991706	0.303364	0.0872615	1.02382	0.388624	0.72046	0.223368
549	RFC5	Replication factor C subunit 5	P40937	P40937	AAA;Rep_fac_C	9	9	9	26.2	26.2	26.2	38.496	0	33.039	269760000	24	46	16.6979	16.3563	15.9395	19.9105	19.644	19.8764	19.6017	19.782	19.7541	20.1362	20.0215	19.5811	3.4791	2.83261	3.38137	2.57945	3.58172	3.52619	-0.09773	0.404099	0.102624	0.203859	0.200354	0.444306
550	RFC3	Replication factor C subunit 3	P40938	P40938	Rep_fac_C	9	9	9	27	27	27	40.556	0	142.33	614050000	21	91	15.0609	15.7903	16.6023	20.3446	20.4361	20.6384	21.0789	20.2177	19.8156	20.7383	20.8415	20.3317	4.6552	2.13869	4.5529	2.79108	4.81934	2.36329	-0.1023	0.0904227	0.164134	0.374394	0.266434	0.250491
551	HADHA	Trifunctional enzyme subunit alpha, mitochondrial;Long-chain enoyl-CoA hydratase;Long chain 3-hydroxyacyl-CoA dehydrogenase	P40939	P40939	3HCDH;3HCDH_N;ECH	10	10	10	14.3	14.3	14.3	82.999	0	73.957	315670000	41	63	16.7038	17.1324	15.9875	19.9895	19.7447	19.7855	20.1987	19.2061	19.5609	20.0621	20.0726	19.6869	3.23205	2.09765	3.04732	2.60206	3.33267	2.31981	-0.184732	0.226024	0.100615	0.266795	0.285346	0.356542
552	EIF2S3;EIF2S3L	Eukaryotic translation initiation factor 2 subunit 3;Putative eukaryotic translation initiation factor 2 subunit 3-like protein	P41091;Q2VIR3;F8W810	P41091;Q2VIR3;F8W810	eIF2_C;GTP_EFTU;GTP_EFTU_D2	17	17	17	37.3	37.3	37.3	51.109	0	169.66	1823600000	21	145	16.5953	16.302	16.6965	21.8088	21.6523	21.4553	22.5452	22.0991	22.3201	21.5745	21.3702	21.5397	5.10755	5.1949	5.79019	5.27413	4.96351	4.42487	0.682645	1.8012	-0.144033	0.509983	-0.826679	1.94676
553	IARS	Isoleucine--tRNA ligase, cytoplasmic	P41252	P41252	Anticodon_1;tRNA-synt_1	19	19	19	16.6	16.6	16.6	144.5	0	73.422	363160000	58	97	15.7533	16.2758	16.8329	19.54	19.3647	18.968	19.5235	19.2578	19.9324	19.5089	19.3278	19.9244	3.00356	2.50739	3.28387	2.73134	3.29965	2.66187	0.280312	0.466768	0.29609	0.533458	0.0157782	0.0198901
554	TMPO	Lamina-associated polypeptide 2, isoform alpha;Thymopoietin;Thymopentin	P42166	P42166	LAP2alpha;LEM;Thymopoietin	17	17	17	29.4	29.4	29.4	75.491	0	131.97	808610000	36	123	17.117	16.8919	16.5363	20.628	20.293	20.8527	21.2753	20.8487	20.8666	20.7794	20.3095	20.3516	3.74288	4.04052	4.1485	4.22435	3.63184	4.01556	0.405621	0.876907	-0.111043	0.192233	-0.516665	1.18384
555	SKIV2L2	Superkiller viralicidic activity 2-like 2	P42285	P42285	DEAD;DSHCT;Helicase_C;rRNA_proc-arch	19	19	19	17.9	17.9	17.9	117.8	0	90.224	483850000	58	163	15.9121	16.3209	17.4113	20.5341	20.3086	20.0352	19.9518	20.1678	20.0755	20.2174	20.4316	20.2816	3.74455	2.06037	3.5169	1.84102	3.76207	1.90157	-0.227651	0.598506	0.0175196	0.0366404	0.245171	1.2896
556	RPS27	40S ribosomal protein S27	P42677	P42677	Ribosomal_S27e	5	5	3	40.5	40.5	15.5	9.461	0	57.449	3428300000	4	172	16.3476	14.7057	16.7903	23.6569	23.6664	22.9643	25.3073	25.5295	25.4334	23.5219	23.2164	24.9371	7.48132	2.48145	9.47551	2.38396	7.94392	3.1189	1.99419	2.03424	0.462603	0.311996	-1.53159	1.00125
557	HELZ	Probable helicase with zinc finger domain	P42694	P42694	zf-CCCH	5	5	5	3.1	3.1	3.1	218.97	0	13.101	20279000	93	10	16.4736	16.488	17.2434	16.6715	15.9145	17.6183	16.4296	15.988	17.0663	17.3708	17.676	17.7168	0	NaN	0	NaN	0.852839	1.20997	0	NaN	0.853101	0.653861	1.09322	1.22065
559	RBM34	RNA-binding protein 34	P42696	P42696	RRM_1	9	9	9	24.2	24.2	24.2	48.564	0	45.332	216280000	27	39	17.1378	15.7182	16.8052	18.8244	19.0636	19.9801	20.1552	19.6362	19.269	18.9558	19.9851	18.5778	2.73563	2.06307	3.13306	2.20111	2.61917	1.91883	0.397433	0.378767	-0.11646	0.0744095	-0.513893	0.435152
560	LRPPRC	Leucine-rich PPR motif-containing protein, mitochondrial	P42704	P42704;Q9NP80	PPR	49	49	49	33.6	33.6	33.6	157.9	0	323.31	4656500000	90	500	16.6181	15.7476	15.2157	23.1633	22.8495	22.9866	23.0524	22.543	22.6712	23.2952	23.1672	23.223	7.13932	2.65027	6.89506	2.88499	7.368	2.54204	-0.244262	0.590479	0.228676	0.944464	0.472938	1.0798
561	RPL35	60S ribosomal protein L35	P42766	P42766	Ribosomal_L29	5	5	5	29.3	29.3	29.3	14.551	0	54.853	15864000000	3	80	16.857	16.6243	16.1706	26.3554	25.7582	25.9542	26.8116	27.1523	27.1837	26.3351	25.7713	26.4734	9.47196	5.34239	10.4986	4.91822	9.64263	5.26825	1.0266	1.93632	0.170672	0.241841	-0.855932	1.42679
563	MATR3	Matrin-3	P43243	P43243		11	11	11	13.7	13.7	13.7	94.622	0	57.903	163250000	37	35	16.8138	16.2483	16.4094	19.8056	19.6087	19.4552	18.4317	16.9314	15.7101	19.5062	19.915	19.8136	3.13266	3.4981	0.533925	0.243924	3.25441	3.75807	-2.59874	1.10549	0.12175	0.310862	2.72049	1.14784
567	MKI67	Antigen KI-67	P46013	P46013	FHA;K167R;PP1_bind	22	22	22	11.5	11.5	11.5	358.69	0	94.694	218570000	179	79	16.7147	15.6298	16.2193	19.9428	19.5728	19.4072	19.8309	20.3939	19.7752	20.1021	19.3459	19.5037	3.45302	2.62393	3.81209	2.93557	3.46265	2.88812	0.359071	0.633842	0.00962893	0.0112774	-0.349442	0.501602
569	NOP2	Probable 28S rRNA (cytosine(4447)-C(5))-methyltransferase	P46087	P46087	Nol1_Nop2_Fmu;P120R	14	14	14	21.4	21.4	21.4	89.301	0	70.763	270800000	32	81	17.1964	16.5893	16.8978	19.0273	19.1218	19.1543	19.7422	19.3199	19.4684	18.8647	18.6876	18.4719	2.20665	2.33501	2.6157	3.32775	1.78024	2.69817	0.409049	1.15716	-0.42641	1.28194	-0.835459	2.10977
571	RPL27A	60S ribosomal protein L27a	P46776	P46776	Ribosomal_L18e	6	6	6	35.1	35.1	35.1	16.561	0	67.884	12955000000	7	215	16.3021	20.8268	17.6838	26.0914	25.9075	24.9795	26.381	26.2812	26.4649	25.4403	25.1652	25.3621	7.38856	1.59695	8.1048	1.58402	7.05165	1.47126	0.716235	0.769191	-0.336915	0.364006	-1.05315	3.04101
572	RPL5	60S ribosomal protein L5	P46777	P46777	Ribosomal_L18_c;Ribosomal_L18p	18	18	18	42.1	42.1	42.1	34.362	0	206.41	23635000000	11	914	14.418	19.4472	16.68	25.6903	25.8471	25.5972	26.5611	26.2519	26.0818	25.3423	24.9066	25.1841	8.86312	1.59119	9.44984	1.65694	8.2959	1.54379	0.586718	1.46995	-0.567217	1.56029	-1.15393	2.42162
573	RPL21	60S ribosomal protein L21	P46778	P46778	Ribosomal_L21e	8	8	8	38.1	38.1	38.1	18.565	0	125.67	2162200000	6	126	14.6705	17.2628	16.0984	22.4106	23.3741	24.0205	23.763	23.8836	23.8536	22.909	22.5771	23.2323	7.25782	2.60673	7.82284	2.04888	6.89555	2.07586	0.565029	0.455454	-0.362268	0.27485	-0.927297	1.45359
574	RPL28	60S ribosomal protein L28	P46779	P46779	Ribosomal_L28e	8	8	8	46	46	46	15.747	0	50.904	5673000000	8	202	16.1584	19.9027	20.9065	24.3757	24.2353	24.5741	23.4189	24.9711	24.4505	24.4721	24.9924	24.0692	5.40584	1.19424	5.29096	1.25088	5.52205	1.23837	-0.114881	0.082638	0.116205	0.145582	0.231085	0.161399
575	RPS9	40S ribosomal protein S9	P46781	P46781	Ribosomal_S4;S4	12	12	12	43.8	43.8	43.8	22.591	0	61.833	22340000000	11	334	16.0974	20.952	15.3802	25.9419	25.8593	25.4998	26.0319	26.3695	27.1248	26.2766	25.9115	25.508	8.29043	1.3866	9.03222	1.49522	8.42218	1.41237	0.741794	0.869211	0.131747	0.190856	-0.610047	0.69124
576	RPS5	40S ribosomal protein S5;40S ribosomal protein S5, N-terminally processed	P46782	P46782	Ribosomal_S7	11	11	11	37.3	37.3	37.3	22.876	0	191.38	12095000000	10	200	16.3006	22.6002	17.5481	25.5105	26.1499	25.4969	26.6858	26.3027	26.6292	25.7887	25.454	25.4851	6.90277	1.16712	7.7229	1.24864	6.75959	1.14252	0.820136	1.37511	-0.143174	0.225906	-0.96331	2.39755
577	RPS10;RPS10P5	40S ribosomal protein S10;Putative 40S ribosomal protein S10-like	P46783;A0A1W2PQS6;Q9NQ39	P46783;A0A1W2PQS6;Q9NQ39	S10_plectin	8	8	7	39.4	39.4	35.2	18.898	0	146.58	3093600000	8	167	15.4038	17.1769	16.9224	23.6006	24.0642	23.0155	23.1587	24.1345	23.8834	23.4961	23.2531	23.2832	7.05907	2.8821	7.22452	2.87941	6.8431	2.24172	0.165454	0.145874	-0.215971	0.256243	-0.381425	0.493249
578	IQGAP1	Ras GTPase-activating-like protein IQGAP1	P46940	P46940	CH;IQ;RasGAP;RasGAP_C	10	10	9	6.4	6.4	5.9	189.25	0	23.287	49514000	83	19	16.1685	17.4472	16.3001	18.7655	18.606	18.4974	15.5256	16.7452	18.2681	18.5672	18.7575	18.3841	1.98439	1.45086	0.207716	0.0805092	1.93101	1.46472	-1.77668	0.814681	-0.0533848	0.148448	1.72329	0.796715
581	EIF1AX;EIF1AY	Eukaryotic translation initiation factor 1A, X-chromosomal;Eukaryotic translation initiation factor 1A, Y-chromosomal	P47813;O14602	P47813;O14602	eIF-1a	4	4	4	22.2	22.2	22.2	16.46	0	30.987	549030000	7	49	15.9269	22.9847	15.5948	21.9876	21.539	21.5618	21.8532	20.9143	21.3953	21.8282	22.2087	21.2963	3.52735	0.551885	3.2188	0.50461	3.60895	0.565105	-0.308543	0.410574	0.0816046	0.0947242	0.390148	0.442169
583	QARS	Glutamine--tRNA ligase	P47897	P47897	tRNA_synt_1c_R1;tRNA_synt_1c_R2;tRNA-synt_1c;tRNA-synt_1c_C	12	12	12	17.8	17.8	17.8	87.798	0	72.661	190710000	45	48	16.6342	16.7308	16.0035	19.6757	19.1406	19.0026	17.8389	19.5145	19.1771	19.167	19.507	19.662	2.8168	3.08465	2.3873	1.5549	2.98916	3.05765	-0.429505	0.301023	0.172352	0.271364	0.601857	0.44228
584	RPL29	60S ribosomal protein L29	P47914	P47914	Ribosomal_L29e	5	5	5	25.2	25.2	25.2	17.752	0	57.508	36241000000	4	107	16.4236	24.0484	16.152	27.6993	27.8436	28.2551	29.498	28.4507	27.523	28.3955	28.7493	27.4693	9.05797	1.14122	9.61586	1.22663	9.33001	1.17961	0.557889	0.362127	0.27204	0.248542	-0.285849	0.154054
586	PRRC2A	Protein PRRC2A	P48634	P48634	BAT2_N	42	40	40	24.7	23.8	23.8	228.86	0	304	1139600000	106	240	15.5938	16.5065	15.8038	20.1107	20.365	20.3964	21.6382	20.6155	20.683	20.4892	20.4555	19.6594	4.32268	2.71576	5.01087	3.43267	4.23334	3.40126	0.688196	0.781657	-0.0893408	0.108254	-0.777537	0.836769
587	CCT5	T-complex protein 1 subunit epsilon	P48643	P48643	Cpn60_TCP1	20	20	20	33.6	33.6	33.6	59.67	0	66.683	864510000	33	125	14.4307	18.3352	16.6725	21.354	21.0888	20.9902	17.3982	20.1995	20.4489	20.8799	21.3321	21.8584	4.66486	1.27677	2.86941	0.889638	4.87735	1.36817	-1.79545	0.684947	0.212489	0.266843	2.00794	0.772464
588	CSNK1A1;CSNK1A1L	Casein kinase I isoform alpha;Casein kinase I isoform alpha-like	P48729;Q8N752	P48729;Q8N752	Pkinase	3	3	3	8.9	8.9	8.9	38.914	0	10.099	46366000	19	18	17.6218	16.2207	16.6551	18.4278	18.0554	17.3305	16.5096	17.8817	17.3759	17.8749	17.8452	18.3582	1.10538	0.970489	0.423221	0.298096	1.19358	1.06134	-0.682156	0.588043	0.0882072	0.08435	0.770363	0.7327
590	RPL34	60S ribosomal protein L34	P49207	P49207	Ribosomal_L34e	6	6	6	29.9	29.9	29.9	13.293	0	18.377	10291000000	6	116	15.0436	16.7511	16.3428	25.9317	25.7999	25.0372	25.5144	26.1545	26.7437	26.2776	25.9984	24.8865	9.54376	3.36487	10.0917	3.72409	9.67498	3.7828	0.547916	0.530147	0.131215	0.091033	-0.416701	0.305591
592	FASN	Fatty acid synthase;[Acyl-carrier-protein] S-acetyltransferase;[Acyl-carrier-protein] S-malonyltransferase;3-oxoacyl-[acyl-carrier-protein] synthase;3-oxoacyl-[acyl-carrier-protein] reductase;3-hydroxyacyl-[acyl-carrier-protein] dehydratase;Enoyl-[acyl-carrier-protein] reductase;Oleoyl-[acyl-carrier-protein] hydrolase	P49327	P49327	Acyl_transf_1;adh_short;ADH_zinc_N;ketoacyl-synt;Ketoacyl-synt_C;Methyltransf_12;PP-binding;PS-DH;Thioesterase	20	20	20	8.7	8.7	8.7	273.42	0	86.213	243030000	125	60	18.0134	16.6665	15.1005	18.9062	18.2033	16.9332	18.2326	17.701	19.3592	17.9657	18.688	19.5213	1.42071	0.610891	1.83743	0.825625	2.13148	0.958628	0.416719	0.213389	0.710764	0.409594	0.294044	0.166886
593	CCT3	T-complex protein 1 subunit gamma	P49368	P49368	Cpn60_TCP1	14	14	14	26.2	26.2	26.2	60.533	0	94.611	639810000	31	149	16.8728	16.0451	16.0445	20.4887	20.4312	19.9292	20.109	20.3356	20.8967	20.3746	19.9654	21.3017	3.96223	3.19336	4.12632	3.40924	4.22644	2.81553	0.164087	0.215768	0.264205	0.23035	0.100119	0.0754757
595	SRP9	Signal recognition particle 9 kDa protein	P49458	P49458		2	2	2	22.1	22.1	22.1	10.112	0	18.612	167110000	7	38	14.5944	17.5248	16.2578	20.6833	21.2231	19.8255	16.063	18.9271	19.6207	20.7183	19.3579	20.2413	4.45162	1.70531	2.07796	0.676041	3.98018	1.57428	-2.37366	0.824476	-0.471441	0.342592	1.90222	0.665309
599	CSNK1E	Casein kinase I isoform epsilon	P49674	P49674	Pkinase	3	3	3	9.9	9.9	9.9	47.315	0	13.823	58696000	22	23	16.4986	16.5429	15.7444	17.914	17.6484	17.706	18.9696	18.7231	18.5405	18.3881	18.881	18.8507	1.49416	1.6779	2.48245	2.41591	2.44464	2.56237	0.988293	2.35088	0.950478	1.87198	-0.0378157	0.0648657
604	RBM25	RNA-binding protein 25	P49756	P49756	PWI;RRM_1	6	6	6	10	10	10	100.18	0	36.708	94619000	33	15	15.8519	16.9648	15.8484	18.1934	18.7136	17.4246	15.3451	19.4822	19.0837	18.0897	18.3575	18.2029	1.88887	1.63549	1.74864	0.502321	1.99501	1.54264	-0.140223	0.0330886	0.106141	0.0939117	0.246364	0.060955
606	LIG3	DNA ligase 3	P49916	P49916	DNA_ligase_A_C;DNA_ligase_A_M;DNA_ligase_A_N;zf-PARP	21	21	21	23.9	23.9	23.9	112.91	0	104.33	322340000	57	78	15.7527	16.6857	15.9237	19.6982	19.8914	19.0799	18.1526	18.9738	19.0991	19.4266	19.4179	19.4195	3.43579	3.04543	2.62111	2.49995	3.30062	2.12724	-0.814682	0.982458	-0.135166	0.196383	0.679516	0.826123
608	EMD	Emerin	P50402	P50402	LEM	5	5	5	15.7	15.7	15.7	28.994	0	18.845	160220000	12	30	15.3362	17.1656	16.15	20.1043	20.2818	20.0935	17.4767	19.9854	15.5499	20.6817	20.6978	20.1779	3.94265	1.78201	1.45341	0.419107	4.30188	2.03108	-2.48924	0.71698	0.359228	0.79663	2.84847	0.810849
610	ST13;ST13P5;ST13P4	Hsc70-interacting protein;Putative protein FAM10A5;Putative protein FAM10A4	P50502;Q8NFI4;Q8IZP2	P50502;Q8NFI4;Q8IZP2	TPR_1;TPR_2	5	5	5	16.5	16.5	16.5	41.331	0	23.069	61288000	11	22	16.3786	16.1574	16.8888	18.6319	18.2294	18.1798	18.0715	17.3263	18.6898	16.7213	16.8521	19.0883	1.8721	2.47772	1.55426	1.4133	1.07898	0.532767	-0.317842	0.289839	-0.793119	0.386244	-0.475277	0.207261
613	CDK7	Cyclin-dependent kinase 7	P50613	P50613	Pkinase	3	3	3	8.7	8.7	8.7	39.038	0	6.534	19772000	19	10	17.406	15.9815	16.0173	17.3988	16.11	14.9361	15.93	16.2373	17.7352	18.1039	17.766	18.01	-0.319944	0.137222	0.165926	0.0802244	1.49171	1.09573	0.48587	0.206995	1.81166	0.910162	1.32579	0.865024
614	CDK9	Cyclin-dependent kinase 9	P50750	P50750	Pkinase	6	5	5	17.5	15.3	15.3	42.777	0	26.708	83519000	19	29	16.3501	16.7897	16.2785	17.507	18.4527	17.0204	19.8182	19.3552	19.6066	15.715	15.2974	17.7368	1.18727	1.03847	3.12058	3.85011	-0.223016	0.0983472	1.93331	1.46387	-1.41029	0.706291	-3.3436	1.36202
615	RPL14	60S ribosomal protein L14	P50914	P50914	Ribosomal_L14e	6	6	6	27.9	27.9	27.9	23.432	0	96.862	15835000000	6	274	17.4911	21.9209	15.3775	27.0066	26.568	25.9244	27.4914	27.0778	27.1237	26.4045	25.951	26.2572	8.23645	1.32426	8.96777	1.36981	7.94104	1.27117	0.731318	0.879923	-0.295406	0.340097	-1.02672	2.27004
616	CCT8	T-complex protein 1 subunit theta	P50990	P50990	Cpn60_TCP1	20	20	20	42.3	42.3	42.3	59.62	0	110.42	1336600000	37	196	16.49	16.9081	16.3161	21.2937	21.0595	20.6862	20.8884	21.1962	21.3973	21.5115	21.1897	22.1101	4.44172	4.23405	4.58924	4.33739	5.03236	3.58959	0.147512	0.253186	0.590635	0.817338	0.443122	0.615384
617	CCT4	T-complex protein 1 subunit delta	P50991	P50991	Cpn60_TCP1	14	14	14	25.8	25.8	25.8	57.924	0	107.41	870870000	33	105	16.3242	15.9183	17.6809	21.4648	21.3899	20.7918	20.8737	21.0066	21.3451	21.4622	21.5445	21.7005	4.57438	2.18137	4.434	1.99085	4.92798	1.97921	-0.140381	0.210709	0.353601	0.631773	0.493982	1.27734
618	FXR1	Fragile X mental retardation syndrome-related protein 1	P51114	P51114	Agenet;FXR1P_C;KH_1	27	27	25	42	42	39.5	69.72	0	323.31	5596200000	28	355	16.9313	15.903	16.3543	23.5163	23.5284	23.8053	24.2702	24.1092	24.0508	23.1576	23.4543	23.081	7.22047	3.15007	7.74722	3.02664	6.83474	3.24483	0.526752	1.87752	-0.385721	1.21068	-0.912474	2.30377
619	FXR2	Fragile X mental retardation syndrome-related protein 2	P51116	P51116	Agenet;FXR1P_C;KH_1	24	22	21	45.5	43.1	40.3	74.222	0	229.83	1384300000	35	200	17.2207	15.9821	16.8246	22.0399	21.7297	21.7216	22.3262	22.0905	22.1259	21.6735	21.8603	21.7784	5.15463	2.54023	5.50508	2.48383	5.09491	2.35795	0.350449	1.23197	-0.0597184	0.188834	-0.410167	1.88231
624	BCAP31	B-cell receptor-associated protein 31	P51572	P51572		5	5	5	16.7	16.7	16.7	27.991	0	14.972	104890000	15	14	15.9429	14.7713	16.8465	19.6724	19.6425	19.1037	16.6209	15.4663	19.3486	19.5713	16.2058	18.7667	3.61933	1.71777	1.29169	0.405817	2.32773	0.86701	-2.32764	0.750376	-1.29161	0.481105	1.03603	0.269935
626	HSD17B4	Peroxisomal multifunctional enzyme type 2;(3R)-hydroxyacyl-CoA dehydrogenase;Enoyl-CoA hydratase 2	P51659	P51659	adh_short;MaoC_dehydratas;SCP2	13	13	13	19.8	19.8	19.8	79.685	0	106.24	801530000	42	97	16.5888	16.4087	17.2091	21.3885	21.0908	20.7142	22.4195	22.5179	22.3428	20.6559	21.2402	21.6345	4.32897	3.68992	5.69119	2.90996	4.44134	3.48221	1.36223	1.81992	0.11237	0.117577	-1.24986	1.35408
629	HNRNPA3	Heterogeneous nuclear ribonucleoprotein A3	P51991	P51991	RRM_1	8	8	8	24.3	24.3	24.3	39.594	0	50.915	733580000	19	116	16.3595	19.7754	16.1782	21.0236	20.7478	20.6161	20.4397	19.5516	19.9425	22.0472	21.7301	21.9956	3.35815	0.993681	2.54021	0.804798	4.48658	1.21606	-0.81794	1.16856	1.12844	2.65781	1.94638	2.02433
631	HNRNPM	Heterogeneous nuclear ribonucleoprotein M	P52272	P52272	HnRNP_M;RRM_1	21	21	21	30.5	30.5	30.5	77.515	0	116.31	1082400000	47	198	16.2258	16.7808	15.985	20.8122	20.7104	20.5021	21.5178	20.9517	20.7309	20.5706	20.7108	20.6132	4.3444	3.01094	4.73626	3.85139	4.30098	2.63089	0.391864	0.636681	-0.0434125	0.157252	-0.435276	0.69599
632	KPNA2	Importin subunit alpha-1	P52292	P52292	Arm;IBB	9	9	9	21.2	21.2	21.2	57.861	0	37.603	142570000	20	41	15.9542	17.0655	17.0317	18.9555	18.6734	15.67	14.7996	18.6751	18.9521	18.4782	18.2655	18.8252	1.08251	0.381001	0.791781	0.207889	1.83917	1.63924	-0.29073	0.0588774	0.756661	0.261425	1.04739	0.286451
634	NCBP2	Nuclear cap-binding protein subunit 2	P52298	P52298	RRM_1	3	3	3	19.2	19.2	19.2	18.001	0	15.208	83889000	9	21	15.78	16.5147	17.1637	19.9247	19.1999	19.116	16.7522	17.9295	18.7765	19.5159	19.1477	19.3838	2.92736	2.23265	1.33322	0.844067	2.86299	1.85268	-1.59414	1.01459	-0.0643673	0.079016	1.52977	0.933194
638	HNRNPF	Heterogeneous nuclear ribonucleoprotein F;Heterogeneous nuclear ribonucleoprotein F, N-terminally processed	P52597	P52597	RRM_1;zf-RNPHF	6	5	5	17.1	14.7	14.7	45.671	0	25.809	162840000	15	33	16.1656	16.3237	15.5902	20.2658	20.213	19.883	17.0936	19.3389	19.1146	19.8988	19.8821	19.7739	4.09412	3.34338	2.48924	1.20524	3.82515	2.57387	-1.60488	0.823453	-0.268972	0.842458	1.33591	0.694818
644	ACLY	ATP-citrate synthase	P53396	P53396	ATP-grasp_2;Citrate_synt;CoA_binding;Ligase_CoA	12	12	12	11.3	11.3	11.3	120.84	0	33.301	227120000	59	44	16.1536	16.1588	17.7693	19.4159	19.3869	19.0246	19.453	19.2024	20.5007	19.8358	19.4603	20.2856	2.58186	1.45641	3.02478	1.8913	3.16664	1.80869	0.442922	0.416353	0.584782	0.929258	0.14186	0.10897
646	COPA	Coatomer subunit alpha;Xenin;Proxenin	P53621	P53621	Coatomer_WDAD;COPI_C;WD40	17	17	17	14.7	14.7	14.7	138.34	0	54.658	190150000	70	73	16.887	15.9602	17.3212	18.8893	18.8563	18.1723	18.6657	18.5901	19.0513	18.935	18.9199	19.271	1.91647	1.64712	2.04624	1.58889	2.31919	1.66022	0.129771	0.177091	0.402719	0.653025	0.272949	0.670543
647	SUB1	Activated RNA polymerase II transcriptional coactivator p15	P53999	P53999	PC4	4	4	4	25.2	25.2	25.2	14.395	0	23.371	457760000	5	44	17.266	21.9377	20.5047	22.7882	22.9534	22.6414	16.117	16.1065	19.2171	20.3886	17.3898	16.6192	2.89148	0.76716	-2.75595	0.718468	-1.77027	0.41774	-5.64743	1.50615	-4.66176	1.2599	0.985675	0.252558
649	BLM	Bloom syndrome protein	P54132	P54132	BDHCT;DEAD;Helicase_C;HRDC;RQC	5	5	5	5.3	5.3	5.3	159	0	36.646	40633000	74	16	15.7537	16.6465	16.4288	17.8535	17.3541	17.9896	18.6325	18.3121	18.3695	16.5998	16.779	17.3994	1.4561	1.83894	2.1617	2.07105	0.649762	0.830523	0.705594	1.31953	-0.806339	1.20154	-1.51193	1.84083
650	RARS	Arginine--tRNA ligase, cytoplasmic	P54136	P54136	Arg_tRNA_synt_N;DALR_1;tRNA-synt_1d	16	16	16	22.4	22.4	22.4	75.378	0	50.322	315500000	37	67	14.8098	16.0679	16.4026	20.0952	19.7876	20.2706	20.1214	20.2865	20.6678	19.9703	19.8735	20.4598	4.29101	2.08078	4.59844	2.20262	4.34112	2.19467	0.307424	0.644458	0.0501035	0.076358	-0.25732	0.455572
654	ALDH18A1	Delta-1-pyrroline-5-carboxylate synthase;Glutamate 5-kinase;Gamma-glutamyl phosphate reductase	P54886	P54886	AA_kinase;Aldedh	15	15	15	20.4	20.4	20.4	87.301	0	67.954	765950000	45	128	17.0837	17.0051	17.4072	20.9064	20.8823	21.0141	20.5303	20.5099	20.4336	20.4432	20.4756	20.7652	3.7689	3.42306	3.32593	3.09666	3.396	4.42477	-0.442977	2.86828	-0.372897	1.27819	0.0700792	0.244354
655	EIF5	Eukaryotic translation initiation factor 5	P55010	P55010	eIF-5_eIF-2B;W2	5	5	5	12.3	12.3	12.3	49.222	0	12.833	116380000	22	21	17.2597	16.1355	15.9554	19.0091	19.1055	18.5768	19.2554	18.9597	18.6008	19.5905	19.5382	19.5666	2.44696	1.78991	2.48844	1.86484	3.11493	1.77918	0.0414797	0.0574009	0.66797	1.27334	0.62649	1.0997
657	CSE1L	Exportin-2	P55060	P55060	CAS_CSE1;Cse1;IBN_N	6	6	6	6.9	6.9	6.9	110.42	0	35.679	45017000	52	20	17.0462	14.9603	16.8363	17.7598	17.4778	17.7306	17.482	17.755	18.1008	15.9877	16.1946	18.2914	1.37512	0.765207	1.4983	0.839819	0.543646	0.21281	0.123177	0.234569	-0.831477	0.425131	-0.954654	0.49077
660	HADHB	Trifunctional enzyme subunit beta, mitochondrial;3-ketoacyl-CoA thiolase	P55084	P55084	Thiolase_C;Thiolase_N	8	8	8	18.1	18.1	18.1	51.294	0	30.645	112520000	26	40	16.4773	17.3985	17.98	19.6393	19.2827	18.3367	19.6452	19.1461	19.009	19.3184	19.181	19.5016	1.80098	1.42369	1.98153	1.5211	2.04839	1.42318	0.180549	0.151193	0.247403	0.226787	0.0668545	0.109878
663	ADAR	Double-stranded RNA-specific adenosine deaminase	P55265	P55265	A_deamin;dsrm;z-alpha	8	8	8	8.3	8.3	8.3	136.06	0	39.422	112010000	69	39	17.4597	16.4961	16.972	19.1656	19.3521	19.7413	18.3031	19.5816	19.2293	19.2639	19.4459	19.3381	2.44377	2.45821	2.0621	1.83689	2.37337	1.94809	-0.381663	0.363457	-0.0703952	0.13992	0.311268	0.300277
665	NHP2L1	NHP2-like protein 1;NHP2-like protein 1, N-terminally processed	P55769	P55769	Ribosomal_L7Ae	4	4	4	33.6	33.6	33.6	14.173	0	16.06	80431000	8	24	16.0889	17.6617	15.5517	18.8216	18.8839	16.7788	19.0354	18.4382	19.1259	18.7147	18.9512	19.0543	1.72731	0.854552	2.43239	1.30576	2.47262	1.24817	0.705077	0.378304	0.745305	0.404496	0.0402279	0.0569341
667	EIF3B	Eukaryotic translation initiation factor 3 subunit B	P55884	P55884	eIF2A;RRM_1	29	29	29	42.1	42.1	42.1	92.48	0	266.58	4789100000	36	500	16.1182	18.9526	16.8046	22.9504	22.3591	22.8892	23.393	22.9422	23.0225	23.1089	22.7381	22.7828	5.44112	1.70421	5.82742	1.72951	5.58482	1.67893	0.386298	0.746089	0.143694	0.253623	-0.242604	0.594937
669	MARS	Methionine--tRNA ligase, cytoplasmic	P56192	P56192	tRNA-synt_1g;WHEP-TRS	8	8	8	9.8	9.8	9.8	101.11	0	26.826	134800000	41	35	15.6997	18.0651	16.7017	19.7818	19.7979	15.2896	18.8535	18.941	18.9608	19.8764	19.5523	19.6546	1.46759	0.353283	2.09623	1.03614	2.87226	1.30068	0.628643	0.145142	1.40467	0.348711	0.77603	2.05409
671	EIF6	Eukaryotic translation initiation factor 6	P56537	P56537;A0A0U1RQV5	eIF-6	3	3	3	15.5	15.5	15.5	26.599	0	31.939	329810000	9	54	15.6663	17.7114	16.6861	19.3331	19.5966	19.5293	21.2486	20.3657	20.5611	19.3883	18.7322	19.4183	2.79842	1.40187	4.03725	1.9867	2.49172	1.41479	1.23883	1.45644	-0.306698	0.51825	-1.54553	1.91157
673	GEMIN4	Gem-associated protein 4	P57678	P57678		10	10	10	10.2	10.2	10.2	120.04	0	40.123	167730000	54	38	15.6695	15.4713	17.4193	19.9926	20.1646	19.9451	16.0974	16.5639	18.5957	20.5209	20.1847	19.8283	3.84738	1.62293	0.898961	0.381505	3.9913	1.79816	-2.94842	1.21857	0.143918	0.256582	3.09234	1.31359
678	TPI1	Triosephosphate isomerase	P60174	P60174	TIM	6	6	6	24.8	24.8	24.8	30.791	0	58.136	216560000	20	25	20.6504	22.9119	15.6429	21.9416	16.9183	16.1714	16.9648	20.6291	22.7647	20.3826	20.2583	22.8873	-1.39129	0.18899	0.384464	0.0480036	1.44103	0.234247	1.77576	0.289265	2.83232	0.590239	1.05656	0.209697
679	EIF3E	Eukaryotic translation initiation factor 3 subunit E	P60228	P60228	eIF3_N;PCI	18	18	18	41.3	41.3	41.3	52.22	0	180.58	3791600000	28	263	16.6286	18.6262	17.844	23.0456	23.0632	23.2212	23.9432	23.5306	23.3878	23.2204	22.7461	22.8537	5.41039	1.96681	5.92095	2.21488	5.24041	2.05134	0.510562	1.09931	-0.169986	0.441722	-0.680548	1.42657
680	SEC61B	Protein transport protein Sec61 subunit beta	P60468	P60468	Sec61_beta	3	3	3	30.2	30.2	30.2	9.9743	0	19.929	170210000	6	12	17.1235	16.2711	17.0052	19.9567	20.2665	16.8304	15.6963	19.8899	19.457	21.2478	21.071	20.3974	2.21796	0.757195	1.54782	0.437752	4.10546	3.41572	-0.670147	0.143751	1.88749	0.650648	2.55764	0.718888
681	MYL6;MYL6B	Myosin light polypeptide 6;Myosin light chain 6B	P60660;P14649	P60660;P14649	EF-hand_6	4	4	4	29.1	29.1	29.1	16.93	0	35.928	103340000	10	15	18.1223	15.247	16.6619	19.5238	19.3564	16.8182	19.6163	19.3059	19.9123	19.0023	16.2872	19.5242	1.88908	0.715341	2.93444	1.18166	1.59418	0.537265	1.04536	0.450342	-0.294897	0.0779179	-1.34026	0.505304
682	ACTB	Actin, cytoplasmic 1;Actin, cytoplasmic 1, N-terminally processed	P60709	P60709;Q6S8J3;A5A3E0;P0CG38;P0CG39;Q9BYX7	Actin	13	13	1	42.9	42.9	4.5	41.736	0	169.96	1402600000	20	190	20.6869	22.9737	20.6796	22.3061	21.2044	21.7341	21.8139	21.1776	22.4543	21.3659	21.3049	22.8587	0.301476	0.129379	0.368539	0.158493	0.39643	0.160553	0.0670624	0.0470972	0.0949542	0.0539457	0.0278918	0.0146275
683	EIF4A1	Eukaryotic initiation factor 4A-I	P60842	P60842	DEAD;Helicase_C	18	18	11	33.3	33.3	20.2	46.153	0	125.84	2005400000	23	222	15.9155	17.1316	16.4224	21.9726	21.5942	21.3502	21.5651	21.8802	22.3783	21.3069	21.288	21.6268	5.14921	2.99606	5.45137	3.33958	4.91741	2.56758	0.302166	0.429917	-0.2318	0.4594	-0.533966	0.857166
684	RPS20	40S ribosomal protein S20	P60866	P60866	Ribosomal_S10	4	4	4	28.6	28.6	28.6	13.373	0	103.26	18222000000	5	225	18.4086	22.4253	19.456	26.773	26.7558	25.6188	25.8377	26.4727	26.9999	26.7433	25.9208	25.8582	6.28594	1.58642	6.34014	1.56868	6.0775	1.50376	0.0541986	0.0360452	-0.20844	0.163571	-0.262639	0.233532
685	PRPS1	Ribose-phosphate pyrophosphokinase 1	P60891	P60891	Pribosyl_synth;Pribosyltran_N	9	9	3	30.8	30.8	11	34.834	0	94.723	768440000	16	88	16.6693	16.2164	16.4712	20.8372	19.7733	20.2891	19.9938	22.3538	22.2197	20.5688	20.5649	21.0712	3.84755	2.64967	5.07016	1.70808	4.28266	4.25144	1.22261	0.607272	0.435108	0.523257	-0.787501	0.38442
688	SRP54	Signal recognition particle 54 kDa protein	P61011	P61011	SRP_SPB;SRP54;SRP54_N	7	7	7	14.9	14.9	14.9	55.704	0	21.395	118980000	30	25	16.6339	15.9722	16.0868	19.2438	19.1243	19.0173	18.6232	18.7277	19.1035	18.319	16.0416	19.4451	2.89752	2.6004	2.5872	3.08548	1.70427	0.642764	-0.310322	0.809822	-1.19325	0.449223	-0.882931	0.326456
692	ABCE1	ATP-binding cassette sub-family E member 1	P61221	P61221	ABC_tran;Fer4;RLI	20	20	20	30.6	30.6	30.6	67.314	0	133.63	1536800000	30	176	14.5867	17.038	16.794	21.8651	21.5398	21.5707	22.9308	23.0451	22.9098	21.5682	21.6803	22.0898	5.51896	1.74574	6.82232	1.89901	5.63987	1.808	1.30336	2.61717	0.120906	0.249341	-1.18246	1.88767
693	RPS3A	40S ribosomal protein S3a	P61247	P61247	Ribosomal_S3Ae	19	19	19	61.4	61.4	61.4	29.945	0	246.68	41242000000	17	543	19.953	22.8517	20.9169	27.3668	27.4307	27.9157	27.6362	28.3722	28.1902	28.072	28.1565	27.7247	6.3305	1.83208	6.82565	1.95062	6.74388	1.85587	0.495148	0.803846	0.413381	0.867448	-0.0817668	0.113333
694	RPL26	60S ribosomal protein L26	P61254;J3QQQ9	P61254;J3QQQ9	KOW	11	11	2	49.7	49.7	11.7	17.258	0	55.818	8537100000	6	352	15.438	22.9774	15.7134	25.8715	25.3267	25.6084	24.831	25.3755	25.4653	25.2474	24.8642	24.4994	7.55926	1.03837	7.18101	1.00126	6.82737	0.964396	-0.378251	0.672081	-0.73189	1.24164	-0.35364	0.530887
695	RPL15	60S ribosomal protein L15	P61313	P61313	Ribosomal_L15e	10	10	10	36.3	36.3	36.3	24.146	0	82.927	9608400000	11	207	18.7835	15.6863	15.9833	26.8686	26.7761	25.3185	25.0233	26.3364	26.4376	25.4985	25.0675	26.6404	9.50334	2.46209	9.1147	2.34731	8.9178	2.33989	-0.388635	0.22375	-0.585534	0.354208	-0.196899	0.108813
697	RPL27	60S ribosomal protein L27	P61353	P61353	KOW;Ribosomal_L27e	7	7	7	47.1	47.1	47.1	15.798	0	43.873	11728000000	6	259	16.7826	17.7111	16.2223	25.8543	25.8321	25.1638	25.5748	25.6678	26.5906	25.7463	25.3144	24.842	8.71136	3.42414	9.03904	3.89241	8.39557	3.54891	0.32768	0.338084	-0.315799	0.383349	-0.643479	0.698385
698	RPL37A	60S ribosomal protein L37a	P61513	P61513;A6NKH3	Ribosomal_L37ae	5	5	5	51.1	51.1	51.1	10.275	0	19.359	1494800000	4	42	16.3281	15.3205	16.8847	16.6073	17.5568	16.764	17.891	24.4758	24.7988	25.084	24.5195	23.7767	0	NaN	6.21078	0.98029	8.28229	3.72054	5.41254	0.867279	7.48405	3.83729	2.07151	0.341575
700	SEC61A1	Protein transport protein Sec61 subunit alpha isoform 1	P61619	P61619;Q9H9S3	Plug_translocon;SecY	6	6	6	13.7	13.7	13.7	52.264	0	19.113	217710000	16	36	16.0444	17.2014	17.0157	20.6254	20.067	16.3198	19.7804	20.3455	20.2096	20.6511	20.545	19.9902	2.25023	0.631563	3.35795	2.38077	3.64161	2.61193	1.10773	0.301631	1.39138	0.38525	0.283653	0.457276
703	HNRNPK	Heterogeneous nuclear ribonucleoprotein K	P61978	P61978	KH_1;ROKNT	12	12	12	26.6	26.6	26.6	50.976	0	97.439	892780000	23	131	15.9925	16.5167	17.0352	21.8025	21.5192	21.3961	18.4116	18.9872	19.9858	21.6992	21.1467	21.5162	5.05783	2.93328	2.61341	1.89301	4.93927	3.19947	-2.44442	1.5651	-0.118562	0.227977	2.32586	1.57915
704	YWHAG	14-3-3 protein gamma;14-3-3 protein gamma, N-terminally processed	P61981	P61981	14-3-3	11	9	7	40.1	32.8	26.3	28.302	0	203.09	3406200000	16	121	17.0403	17.0733	15.5253	22.4376	22.3832	21.505	23.6041	23.1069	22.8697	24.8493	25.0399	24.1825	5.56228	2.7337	6.64729	2.68905	8.14428	3.1006	1.08501	1.31137	2.58199	2.50055	1.49699	1.90951
705	RPS7	40S ribosomal protein S7	P62081	P62081	Ribosomal_S7e	8	8	8	33	33	33	22.127	0	27.41	7508100000	10	122	17.3971	16.9471	15.4563	24.8642	25.8515	26.5921	25.6421	25.859	24.8586	26.2071	26.5875	25.1957	9.16909	3.48337	8.85308	3.04787	9.3966	3.43915	-0.316003	0.205004	0.227514	0.12803	0.543517	0.449181
710	RPS8	40S ribosomal protein S8	P62241	P62241	Ribosomal_S8e	12	12	12	52.4	52.4	52.4	24.205	0	323.31	32100000000	9	741	15.5232	21.7491	19.8975	26.8093	26.8017	25.9399	27.2747	27.4809	27.3027	26.4939	26.263	26.5281	7.46035	1.2758	8.29614	1.33773	7.37171	1.24354	0.83579	1.02264	-0.0886434	0.101202	-0.924433	2.91453
711	RPS15A	40S ribosomal protein S15a	P62244;H3BN98	P62244;H3BN98	Reticulon;Ribosomal_S8	6	6	6	38.5	38.5	38.5	14.839	0	24.851	8916500000	8	336	16.006	15.968	16.7911	24.5365	24.4808	24.0818	24.9625	25.1833	25.7553	24.7731	24.633	24.4286	8.11132	3.99299	9.04532	4.7804	8.35654	3.55756	0.934002	1.42745	0.245225	0.618118	-0.688777	1.07631
712	RPS16	40S ribosomal protein S16	P62249	P62249	Ribosomal_S9	11	11	11	58.9	58.9	58.9	16.445	0	104.29	19198000000	11	337	17.1139	21.0186	16.2375	26.0119	26.0481	25.0945	26.2242	25.9103	26.6682	25.5636	25.3619	25.5688	7.59482	1.51046	8.14424	1.54099	7.37475	1.42901	0.549419	0.636221	-0.220071	0.254537	-0.76949	1.20788
713	YWHAE	14-3-3 protein epsilon	P62258	P62258	14-3-3	22	22	20	78	78	71	29.174	0	294.63	8433800000	17	518	17.9903	21.8092	18.5342	23.3797	22.8089	22.6281	23.1497	23.2117	23.8978	25.6377	25.5465	25.0526	3.49428	1.02415	3.97514	1.13005	5.96766	1.45437	0.480857	0.659977	2.47337	2.89484	1.99252	2.46312
714	RPS14	40S ribosomal protein S14	P62263	P62263	Ribosomal_S11	9	9	9	41.7	41.7	41.7	16.273	0	206.08	19307000000	4	282	20.4054	22.6101	20.76	27.0625	26.974	27.4305	27.3503	26.9726	26.794	26.7433	26.6976	26.6061	5.8972	1.97024	5.7805	1.9835	5.42387	1.81657	-0.116697	0.20932	-0.47333	1.17106	-0.356632	0.808976
715	RPS23	40S ribosomal protein S23	P62266	P62266	Ribosom_S12_S23	5	5	5	29.4	29.4	29.4	15.807	0	33.482	2005900000	6	167	16.7015	15.3265	15.3588	22.9098	23.137	23.3342	22.9582	23.1499	23.3009	22.8438	22.5551	22.5526	7.33135	2.65049	7.34072	2.57459	6.85489	2.50272	0.00937208	0.0197356	-0.47646	1.3904	-0.485832	1.60701
716	RPS18	40S ribosomal protein S18	P62269	P62269	Ribosomal_S13	13	13	13	53.9	53.9	53.9	17.718	0	112.98	33274000000	9	388	17.2644	21.4843	15.365	26.6309	26.5453	26.0038	25.9107	27.5516	27.1837	26.5802	26.627	26.8097	8.35539	1.37308	8.84407	1.49615	8.63435	1.38732	0.48868	0.359502	0.278957	0.538358	-0.209723	0.14549
717	RPS29	40S ribosomal protein S29	P62273	P62273	Ribosomal_S14	3	3	3	46.4	46.4	46.4	6.6767	0	8.8756	2144700000	2	33	16.2195	22.833	16.7423	22.0214	23.4773	25.4841	21.9648	23.1121	22.9818	24.0175	24.6318	23.1072	5.0627	0.904185	4.08803	0.718914	5.32059	0.907973	-0.974674	0.356479	0.257895	0.0806286	1.23257	0.998753
718	RPS13	40S ribosomal protein S13	P62277	P62277	Ribosomal_S13_N;Ribosomal_S15	9	9	9	44.4	44.4	44.4	17.222	0	83.225	14057000000	9	305	17.0344	16.4423	16.6988	25.4174	25.3723	24.9842	25.9323	25.8696	26.1081	25.4412	25.4009	25.185	8.53281	5.37802	9.24486	4.31783	8.61722	4.409	0.71205	1.7145	0.084411	0.200764	-0.627639	2.36108
719	RPS11	40S ribosomal protein S11	P62280	P62280	Ribosomal_S17	15	15	15	64.6	64.6	64.6	18.431	0	143.33	21238000000	10	342	20.3457	21.1904	19.7442	26.4177	26.474	26.3218	26.0431	26.7013	26.5912	26.7312	27.1693	26.4252	5.97773	2.34507	6.01844	2.92039	6.34845	3.04495	0.0407054	0.0646154	0.370719	0.648003	0.330013	0.483261
720	SNRPE	Small nuclear ribonucleoprotein E	P62304	P62304	LSM	2	2	2	25	25	25	10.803	0	39.583	1245200000	4	47	17.1798	17.0795	17.5651	22.7795	23.2381	15.4354	23.5655	24.1651	23.8812	22.6923	22.7469	23.9452	3.20953	0.479056	6.59578	4.97775	5.85334	2.68273	3.38625	0.505665	2.64381	0.391757	-0.742442	0.691933
721	SNRPF	Small nuclear ribonucleoprotein F	P62306	P62306	LSM	4	4	4	32.6	32.6	32.6	9.7251	0	78.061	2585900000	4	162	17.0941	15.8314	16.2579	23.2852	23.453	23.4583	23.6515	23.5086	23.7071	23.7991	23.8144	23.2867	7.00432	2.63639	7.22792	2.67165	7.23891	3.26117	0.223601	1.27776	0.23459	0.511992	0.0109889	0.0192243
723	SNRPD1	Small nuclear ribonucleoprotein Sm D1	P62314	P62314	LSM	3	3	3	20.2	20.2	20.2	13.281	0	67.339	996320000	4	87	17.1754	16.411	16.139	21.7198	21.5502	18.2217	22.3479	21.7293	22.6904	21.6628	20.0777	21.5427	3.9221	1.18012	5.68076	3.74196	4.51926	2.47056	1.75866	0.585922	0.597165	0.175605	-1.1615	0.864814
724	SNRPD2	Small nuclear ribonucleoprotein Sm D2	P62316	P62316	LSM	8	8	8	61.9	61.9	61.9	13.527	0	154.83	6217200000	7	306	16.0556	16.3306	15.786	23.5424	23.8886	23.6197	24.1522	24.1448	24.0423	24.1733	24.1982	23.6202	7.62617	5.05469	8.05569	3.68212	7.9398	5.13163	0.429511	1.36401	0.313625	0.622329	-0.115886	0.219103
725	SNRPD3	Small nuclear ribonucleoprotein Sm D3	P62318	P62318	LSM	5	5	5	53.2	53.2	53.2	13.916	0	107.07	2862000000	6	91	16.2206	15.5419	17.2975	24.0991	24.3031	23.3367	24.509	24.9315	24.8689	24.6118	24.4961	24.5284	7.55964	3.12717	8.41648	2.64675	8.19211	2.4271	0.856833	1.08042	0.632467	0.78846	-0.224366	0.646097
726	RPL7A	60S ribosomal protein L7a	P62424	P62424	Ribosomal_L7Ae	19	19	19	46.2	46.2	46.2	29.995	0	323.31	28089000000	10	737	15.0542	21.7739	15.6558	26.3645	26.3264	26.0917	26.1684	26.1361	26.6832	25.5255	25.2056	25.3613	8.76625	1.26085	8.83462	1.27265	7.86951	1.17552	0.0683683	0.123773	-0.896737	2.679	-0.965106	1.77526
727	ETF1	Eukaryotic peptide chain release factor subunit 1	P62495	P62495	eRF1_1;eRF1_2;eRF1_3	10	10	10	25.9	25.9	25.9	49.03	0	45.138	159800000	25	61	16.2932	16.7533	15.9794	18.7415	18.8439	18.5961	18.6069	19.3954	19.5359	18.7494	18.5782	19.2239	2.38519	2.30007	2.83742	2.72219	2.50857	2.9292	0.452222	0.593469	0.123373	0.222953	-0.328849	0.3925
729	RPS4X;RPS4Y2	40S ribosomal protein S4, X isoform;40S ribosomal protein S4, Y isoform 2	P62701;Q8TD47	P62701;Q8TD47;P22090	KOW;Ribosomal_S4e;RS4NT;S4	20	20	20	63.9	63.9	63.9	29.597	0	267.04	15751000000	16	431	16.5766	21.4873	16.7325	25.7873	25.6123	26.0717	26.0947	26.3832	26.2726	25.737	26.0399	25.8466	7.5583	1.37945	7.98469	1.41926	7.60903	1.38008	0.426394	1.18513	0.0507336	0.113511	-0.375661	1.42998
732	RPL23A	60S ribosomal protein L23a	P62750	P62750	Ribosomal_L23;Ribosomal_L23eN	10	10	10	48.7	48.7	48.7	17.695	0	100.03	26732000000	6	470	19.1895	22.264	19.7103	27.0577	27.1833	26.3289	26.3721	26.8301	26.9815	26.6023	26.3999	26.0624	6.4687	1.81361	6.33999	1.72782	5.96696	1.65788	-0.128705	0.14673	-0.501738	0.706812	-0.373032	0.701143
733	RPS6	40S ribosomal protein S6	P62753	P62753	Ribosomal_S6e	10	10	10	34.5	34.5	34.5	28.68	0	191.33	20343000000	8	326	16.0851	16.6053	17.86	26.4973	26.7376	26.613	27.2488	27.3546	27.5657	26.2012	26.5251	26.8042	9.76582	2.59847	10.5395	2.7161	9.66	2.88647	0.773696	2.45933	-0.105829	0.209575	-0.879524	1.69321
734	HIST1H4A	Histone H4	P62805	P62805	Histone	4	4	4	40.8	40.8	40.8	11.367	0	21.726	275680000	6	59	17.5005	17.4484	15.4534	20.4934	20.2225	16.4911	15.0293	20.4098	20.5499	20.3406	19.8418	21.5338	2.26819	0.663798	1.8622	0.377827	3.77129	1.88402	-0.40599	0.0628538	1.5031	0.43359	1.90909	0.391914
735	RAN	GTP-binding nuclear protein Ran	P62826	P62826	Ras	5	5	5	25.9	25.9	25.9	24.423	0	32.983	340540000	11	54	16.2719	17.3005	17.5705	21.2544	20.0519	16.2202	19.6656	20.1825	21.4671	19.5601	19.309	21.7457	2.12789	0.531603	3.39078	2.05877	3.15729	1.43961	1.26289	0.300653	1.0294	0.230115	-0.233489	0.0874118
736	RPL23	60S ribosomal protein L23	P62829	P62829	Ribosomal_L14	7	7	7	55.7	55.7	55.7	14.865	0	102.28	2060300000	9	262	16.9977	17.0346	16.3025	21.6251	21.2281	21.0387	23.1525	23.6243	23.0442	21.3391	21.5143	22.802	4.51902	3.7217	6.49542	4.32418	5.10687	2.64855	1.97639	2.86936	0.587846	0.479135	-1.38855	1.09686
737	RPS15	40S ribosomal protein S15	P62841	P62841	Ribosomal_S19	3	3	3	14.5	14.5	14.5	17.04	0	47.645	6082000000	7	169	18.2004	15.6857	16.9667	22.0616	22.7827	22.8746	23.4526	25.9753	25.2444	25.4998	25.7733	25.4523	5.62203	2.0164	7.93983	2.794	8.62418	2.20581	2.31779	1.10917	3.00215	2.50661	0.684352	0.33907
738	RPS24	40S ribosomal protein S24	P62847	P62847	Ribosomal_S24e	5	5	5	26.3	26.3	26.3	15.423	0	87.92	6912600000	6	189	15.8327	17.0924	17.5776	24.89	25.2049	25.4298	25.8618	25.4851	25.344	25.1292	25.202	24.664	8.34067	2.69272	8.72941	2.73217	8.16418	2.71157	0.388735	0.818322	-0.176499	0.313478	-0.565235	1.15954
739	RPS25	40S ribosomal protein S25	P62851	P62851	Ribosomal_S25	5	5	5	29.6	29.6	29.6	13.742	0	62.591	12567000000	5	279	16.8216	23.732	16.572	25.8808	25.9797	25.6281	26.4716	25.7708	26.5659	25.6307	25.1146	26.1158	6.78765	0.994383	7.22756	1.04792	6.5785	0.978828	0.439907	0.66816	-0.209155	0.25683	-0.649062	0.778513
740	RPS26;RPS26P11	40S ribosomal protein S26;Putative 40S ribosomal protein S26-like 1	P62854;Q5JNZ5	P62854;Q5JNZ5	Ribosomal_S26e	5	5	5	48.7	48.7	48.7	13.015	0	81.219	9100300000	5	86	17.1632	17.2271	15.4449	26.0389	26.3828	25.8808	26.5282	26.7652	26.498	25.7198	25.4578	25.6549	9.48909	2.62848	9.98538	2.53846	8.9991	2.43635	0.496293	1.23745	-0.489982	1.21913	-0.986275	2.97642
741	RPS28	40S ribosomal protein S28	P62857	P62857	Ribosomal_S28e	3	3	3	44.9	44.9	44.9	7.8409	0	29.066	4337100000	3	136	16.5209	23.3695	16.2758	24.1572	24.3643	24.4421	24.9771	24.6345	24.8049	24.7339	24.1899	23.7286	5.59911	0.861746	6.08342	0.920834	5.4954	0.85451	0.484308	1.66909	-0.10371	0.119022	-0.588018	0.766468
743	RBX1	E3 ubiquitin-protein ligase RBX1;E3 ubiquitin-protein ligase RBX1, N-terminally processed	P62877	P62877	zf-rbx1	1	1	1	16.7	16.7	16.7	12.274	0	19.789	41829000	3	13	16.0375	15.8547	16.3669	16.115	17.8438	17.0023	18.7413	17.7024	17.726	18.1136	17.2786	17.6826	0.900663	0.684628	1.97018	1.77803	1.60524	2.09096	1.06952	0.79263	0.70458	0.527969	-0.364942	0.35865
744	RPL30	60S ribosomal protein L30	P62888	P62888	Ribosomal_L7Ae	6	6	6	58.3	58.3	58.3	12.784	0	157.02	5113200000	6	260	16.4138	16.6479	17.3576	23.5979	23.8599	23.0545	24.1471	24.5362	24.7723	23.3526	22.7638	23.9118	6.69768	4.1651	7.67879	4.12031	6.53629	3.8705	0.981103	1.47465	-0.161397	0.146122	-1.1425	1.26596
746	RPL31	60S ribosomal protein L31	P62899	P62899	Ribosomal_L31e	6	6	6	44.8	44.8	44.8	14.463	0	43.101	26013000000	7	164	20.8884	23.2107	21.352	27.5914	27.6608	27.7633	26.8631	27.7664	27.2794	27.4565	27.5264	26.4615	5.85484	1.85304	5.48596	2.03008	5.33111	2.129	-0.368875	0.535137	-0.523722	0.575183	-0.154847	0.131218
747	RPL10A	60S ribosomal protein L10a	P62906	P62906	Ribosomal_L1	8	8	8	33.6	33.6	33.6	24.831	0	182.02	15478000000	10	324	17.5309	17.0617	16.377	26.1165	26.1619	25.0536	26.3513	26.7216	26.8708	25.5173	25.2184	25.9974	8.78747	4.21504	9.65802	3.71974	8.58783	4.11163	0.870551	0.907685	-0.199643	0.174563	-1.07019	1.65232
748	RPL32	60S ribosomal protein L32	P62910	P62910	Ribosomal_L32e	8	8	8	51.1	51.1	51.1	15.86	0	111.07	7339300000	7	310	16.9556	16.3652	16.371	24.7828	24.7621	23.9425	25.521	25.6635	25.8001	24.8236	24.0836	24.5469	7.93184	4.3395	9.09758	4.12805	7.92072	4.92637	1.16574	1.36754	-0.0111128	0.0103984	-1.17685	1.66971
749	RPL11	60S ribosomal protein L11	P62913	P62913	Ribosomal_L5;Ribosomal_L5_C	8	8	8	41.6	41.6	41.6	20.252	0	155.16	7115900000	10	182	16.8927	23.1989	17.404	24.6831	25.0685	24.5062	25.1647	25.811	25.6441	24.822	24.5092	24.9318	5.58741	0.96314	6.37475	1.06405	5.58911	0.961763	0.787343	1.42184	0.00169945	0.00264819	-0.785644	1.46199
750	RPL8	60S ribosomal protein L8	P62917	P62917	Ribosomal_L2;Ribosomal_L2_C	7	7	7	22.6	22.6	22.6	28.024	0	253.53	11289000000	10	250	16.4274	17.1269	16.9274	26.1668	25.3284	25.134	26.2087	26.1955	26.6843	25.7347	25.5688	25.1587	8.71578	4.17557	9.53557	5.1996	8.66016	5.10394	0.819798	0.977523	-0.0556145	0.0521463	-0.875413	1.68861
751	PPIA	Peptidyl-prolyl cis-trans isomerase A;Peptidyl-prolyl cis-trans isomerase A, N-terminally processed	P62937	P62937;F5H284;Q9Y536;P0DN26;A0A0B4J2A2;A0A075B767;A0A075B759;P0DN37	Pro_isomerase	7	7	7	37	37	37	18.012	0	27.771	303450000	10	65	15.5178	22.5067	19.1395	21.0744	19.3653	20.094	19.2342	18.4175	20.4797	18.8056	16.534	20.4499	1.12324	0.195333	0.32246	0.0504027	-0.458192	0.067924	-0.800781	0.439829	-1.58143	0.523898	-0.780652	0.232372
752	RPS27A;UBC;UBB;UBA52	Ubiquitin-40S ribosomal protein S27a;Ubiquitin;40S ribosomal protein S27a;Polyubiquitin-C;Ubiquitin;Polyubiquitin-B;Ubiquitin;Ubiquitin-60S ribosomal protein L40;Ubiquitin;60S ribosomal protein L40	P62979;A0A2R8Y422;P0CG48;P0CG47;P62987	P62979;A0A2R8Y422;P0CG48;P0CG47;P62987	Ribosomal_L40e;Ribosomal_S27;ubiquitin	7	7	7	54.5	54.5	54.5	17.965	0	140.68	1460000000	6	123	16.0583	22.1875	16.0467	23.3044	22.9967	20.9866	22.2794	22.1628	22.6145	21.8757	21.6737	21.5941	4.33173	0.801162	4.25474	0.76338	3.61698	0.659939	-0.0769927	0.0333873	-0.714751	0.367233	-0.637758	1.64155
755	YWHAZ	14-3-3 protein zeta/delta	P63104	P63104	14-3-3	12	10	9	55.5	48.2	44.5	27.745	0	156.04	1747000000	14	96	15.4948	22.1909	17.6752	23.3693	23.002	22.479	22.8281	22.0775	22.2335	23.6993	24.0618	23.4034	4.49649	0.829842	3.92609	0.73707	5.26789	0.939812	-0.5704	0.757873	0.771403	1.09871	1.3418	1.9366
759	RPL38	60S ribosomal protein L38	P63173	P63173	Ribosomal_L38e	4	4	4	41.4	41.4	41.4	8.2178	0	19.545	923070000	3	147	16.143	16.6087	16.2236	24.0271	23.5527	22.5016	21.6166	22.4291	22.3678	20.4399	17.406	21.645	7.03538	2.69594	5.81271	3.62766	3.50522	0.971059	-1.22267	1.02252	-3.53015	1.02603	-2.30749	0.688224
761	RPS21	40S ribosomal protein S21	P63220	P63220	Ribosomal_S21e	9	9	9	72.3	72.3	72.3	9.1113	0	312.99	6881300000	5	298	15.8643	22.4649	19.1936	24.748	25.5831	25.1747	25.0212	24.566	24.6546	24.6896	24.0542	23.3644	5.99432	1.06723	5.57301	1.00462	4.86177	0.92006	-0.421314	0.653834	-1.13255	1.10721	-0.711234	0.707356
763	GNB2L1	Guanine nucleotide-binding protein subunit beta-2-like 1;Guanine nucleotide-binding protein subunit beta-2-like 1, N-terminally processed	P63244	P63244	WD40	17	17	17	50.2	50.2	50.2	35.076	0	323.31	30602000000	20	910	15.2173	21.4196	20.9664	26.1192	26.7363	26.4106	26.6773	26.661	26.9467	25.6345	25.6247	25.8062	7.2209	1.1705	7.56055	1.20152	6.48736	1.0813	0.339647	0.722924	-0.733542	1.36547	-1.07319	2.87422
766	YBX1	Nuclease-sensitive element-binding protein 1	P67809	P67809;Q9Y2T7	CSD	17	17	13	66.7	66.7	54.3	35.924	0	323.31	10030000000	13	411	20.2841	23.4593	22.8835	26.0736	25.889	25.8014	24.6772	24.0528	23.593	26.0035	25.7621	25.5568	3.71237	1.20873	1.89873	0.736564	3.56521	1.18605	-1.81364	1.63742	-0.147157	0.400558	1.66648	1.66915
767	CSNK2B	Casein kinase II subunit beta	P67870	P67870	CK_II_beta	3	3	3	13	13	13	24.942	0	13.646	297910000	10	37	16.7102	16.7926	17.1107	20.5122	20.536	19.76	16.4514	20.9474	20.6667	20.689	21.1017	20.711	3.39827	2.81883	2.48398	0.639994	3.96276	4.5558	-0.914289	0.225017	0.564495	0.841975	1.47878	0.38061
768	EEF1A1;EEF1A1P5;EEF1A2	Elongation factor 1-alpha 1;Putative elongation factor 1-alpha-like 3;Elongation factor 1-alpha 2	P68104;Q5VTE0;Q05639	P68104;Q5VTE0;Q05639	GTP_EFTU;GTP_EFTU_D2;GTP_EFTU_D3	9	9	9	19.3	19.3	19.3	50.14	0	57.717	1285200000	21	74	16.3177	20.4998	17.6102	21.2192	20.8393	20.5607	20.782	21.5214	22.4875	21.1093	21.3486	22.6146	2.73049	0.809837	3.4544	1.03327	3.54825	1.05232	0.723903	0.555562	0.817762	0.667002	0.0938594	0.0472767
769	TUBA1B;TUBA1C;TUBA1A;TUBA4A;TUBA3C	Tubulin alpha-1B chain;Tubulin alpha-1C chain;Tubulin alpha-1A chain;Tubulin alpha-4A chain;Tubulin alpha-3C/D chain	P68363;Q9BQE3;Q71U36;P68366;Q13748	P68363;Q9BQE3;Q71U36;P68366;Q13748;Q6PEY2;A6NHL2;Q9H853	Tubulin;Tubulin_C	11	11	7	29	29	17.3	50.151	0	83.908	1017400000	21	123	16.4238	21.0577	17.0698	22.2283	22.1569	21.8554	22.3734	22.4612	22.7397	21.9435	21.6231	22.7616	3.89645	0.942909	4.341	1.02295	3.92562	0.972068	0.444551	1.30995	0.0291665	0.0263175	-0.415385	0.461089
770	TUBB4B;TUBB4A;TUBB8	Tubulin beta-4B chain;Tubulin beta-4A chain;Tubulin beta-8 chain	P68371;P04350;Q3ZCM7	P68371;P04350;Q3ZCM7	Tubulin;Tubulin_C	11	11	3	27.6	27.6	9.9	49.83	0	232.74	1514100000	20	236	16.1286	15.6178	16.5697	21.9816	21.8509	21.9941	22.1625	22.2368	22.5316	22.0505	21.9358	22.5648	5.83689	2.75736	6.20499	3.29196	6.07837	3.92858	0.368099	1.17736	0.241485	0.471631	-0.126614	0.215588
776	EIF4G2	Eukaryotic translation initiation factor 4 gamma 2	P78344	P78344	MA3;MIF4G;W2	20	20	20	22.2	22.2	22.2	102.36	0	69.636	400950000	50	103	16.353	15.8156	16.6386	19.1586	18.9685	19.2159	20.1968	19.2652	19.4087	18.9617	19.0371	18.6238	2.84531	2.3936	3.3545	2.99168	2.60516	2.63209	0.509192	0.665657	-0.240147	0.70952	-0.749339	0.971912
778	RPP30	Ribonuclease P protein subunit p30	P78346	P78346	RNase_P_p30	3	3	3	9.3	9.3	9.3	29.321	0	11.478	16779000	15	11	16.5637	17.6853	15.7129	17.4346	15.3242	16.7535	16.6792	17.188	15.5468	17.5932	16.8344	17.4223	0	NaN	-0.182661	0.086345	0.629315	0.407464	-0.0327524	0.0136872	0.779224	0.470671	0.811976	0.634526
779	GTF2I	General transcription factor II-I	P78347	P78347;Q6EKJ0;Q86UP8	GTF2I	22	22	22	22	22	22	112.42	0	125.07	785580000	48	117	17.5097	21.6737	16.5234	22.0782	21.9309	21.4269	21.2025	21.2664	21.528	22.1225	21.9291	22.1359	3.24309	0.758387	2.76337	0.65426	3.49358	0.80391	-0.479717	0.922312	0.250493	0.478656	0.73021	2.24942
780	SRPK2	SRSF protein kinase 2;SRSF protein kinase 2 N-terminal;SRSF protein kinase 2 C-terminal	P78362	P78362;Q9UPE1	Pkinase	11	9	9	18.8	16.3	16.3	77.526	0	44.467	324690000	29	74	16.036	16.9023	17.7387	19.7874	19.9	19.9001	19.6888	19.7625	19.7952	20.185	20.2062	19.6841	2.97018	1.58935	2.85649	1.55374	3.13276	1.80786	-0.113691	1.08014	0.162584	0.353833	0.276275	0.611772
781	CCT2	T-complex protein 1 subunit beta	P78371	P78371	Cpn60_TCP1	14	14	14	29.2	29.2	29.2	57.488	0	102.73	940510000	32	136	16.5426	17.4239	16.1419	20.8535	20.9487	21.2638	20.2292	20.7755	21.1641	21.2116	21.0234	21.5097	4.31921	2.38527	4.02013	2.81724	4.54544	2.51188	-0.299088	0.404013	0.226227	0.527705	0.525316	0.735239
782	PRKDC	DNA-dependent protein kinase catalytic subunit	P78527	P78527	FAT;FATC;NUC194;PI3_PI4_kinase	57	57	57	13.5	13.5	13.5	469.08	0	236.77	1512700000	220	302	16.5341	16.4949	17.7207	21.9482	21.8871	21.7098	22.1284	22.0672	21.9549	21.9803	22.022	21.8659	4.93177	2.26825	5.13358	2.26131	5.03951	2.23792	0.201811	1.04566	0.10774	0.544063	-0.0940717	0.610871
783	DCD	Dermcidin;Survival-promoting peptide;DCD-1	P81605	P81605	Dermcidin	2	2	2	20	20	20	11.284	0	12.117	44895000	5	11	22.3019	23.3177	22.0942	16.5635	17.0098	16.8144	17.4075	15.5252	15.7563	16.262	16.6591	15.9673	-5.77534	2.71503	-6.34162	2.76224	-6.27511	3.19555	0	NaN	0	NaN	0	NaN
784	MRPS22	28S ribosomal protein S22, mitochondrial	P82650	P82650	MRP-S22	4	4	4	12.5	12.5	12.5	41.28	0	24.795	131300000	24	26	17.3185	17.3223	17.4261	18.3759	18.4108	18.456	19.7936	19.2236	18.9143	18.4656	17.992	18.4337	1.0586	4.30964	1.95486	1.80882	0.941455	1.68049	0.896258	1.14017	-0.117148	0.280165	-1.01341	1.42018
790	RPL24	60S ribosomal protein L24	P83731	P83731	Ribosomal_L24e	7	7	7	36.9	36.9	36.9	17.779	0	42.342	4931600000	8	190	15.9827	16.7822	16.5072	23.4762	23.3288	22.6163	24.3746	24.8714	24.815	23.6453	23.3957	24.0159	6.71638	4.29241	8.26294	4.57719	7.26157	4.55538	1.54655	1.89935	0.545182	0.758987	-1.00137	1.84306
792	RPL19	60S ribosomal protein L19	P84098	P84098	Ribosomal_L19e	6	6	6	18.4	18.4	18.4	23.466	0	136.23	3999000000	6	238	16.0688	15.7925	16.6219	25.1426	25.2014	24.7475	25.853	25.5783	25.2775	24.5034	23.9275	24.8288	8.86946	4.39393	9.40853	4.74368	8.25883	4.65326	0.539069	1.14885	-0.610638	0.879615	-1.14971	1.54893
793	SRSF3	Serine/arginine-rich splicing factor 3	P84103	P84103	RRM_1	5	4	4	30.5	22	22	19.329	0	31.457	347950000	7	60	15.7338	15.5573	17.2882	21.8398	21.9317	21.9786	18.6073	19.5301	19.334	21.5516	22.0755	20.6687	5.72361	2.05459	2.96403	1.75648	5.23886	2.66743	-2.75957	2.04252	-0.484746	0.445033	2.27483	1.86618
794	RBM10	RNA-binding protein 10	P98175	P98175	G-patch;zf-RanBP	11	11	10	14.3	14.3	13.5	103.53	0	84.229	126090000	39	44	16.0874	15.1044	16.8213	19.9479	19.7705	19.4305	16.5758	15.3215	16.8865	19.5309	19.3051	19.1706	3.71192	1.92681	0	NaN	3.33118	1.74359	-3.45507	1.90617	-0.380744	0.932465	3.07433	1.71171
798	HDLBP	Vigilin	Q00341	Q00341	KH_1	22	22	22	19.2	19.2	19.2	141.45	0	108.88	405050000	66	109	17.2262	16.8687	16.0229	20.5844	20.1461	20.2437	19.4246	20.0493	19.3371	19.6313	19.608	19.5781	3.61881	2.32701	2.89772	2.36636	2.8999	1.8337	-0.721087	1.19552	-0.718911	1.50751	0.00217628	0.0029867
801	CLTC	Clathrin heavy chain 1	Q00610	Q00610;P53675	Clathrin;Clathrin_propel;Clathrin-link	18	18	18	12.4	12.4	12.4	191.61	0	111.38	375370000	90	100	15.5313	16.2979	16.8745	19.9797	19.8975	19.7806	19.2408	19.3498	19.8769	19.6421	19.7014	19.9607	3.65137	2.00337	3.25461	2.28209	3.53351	2.06276	-0.396763	0.761485	-0.117857	0.431145	0.278906	0.530093
803	HNRNPU	Heterogeneous nuclear ribonucleoprotein U	Q00839	Q00839	SAP;SPRY	22	22	22	25	25	25	90.583	0	209.12	2851200000	37	239	16.6991	17.8915	14.7472	23.5649	23.2421	22.4337	20.9737	21.1805	21.8137	23.5141	23.2971	23.3564	6.63432	1.95973	4.87673	1.57531	6.94328	1.78005	-1.75758	1.78812	0.308966	0.340438	2.06655	1.96738
804	SET;SETSIP	Protein SET;Protein SETSIP	Q01105;P0DME0	Q01105;P0DME0	NAP	7	7	7	26.6	26.6	26.6	33.488	0	99.006	1591100000	9	147	23.5777	25.2243	24.0286	23.6312	23.3762	22.1905	23.2879	23.3427	23.2532	23.1239	22.7606	22.6101	-1.21089	0.847253	-0.98231	0.736972	-1.44537	1.05701	0.228578	0.181735	-0.234477	0.181467	-0.463055	1.04809
805	SRSF2;SRSF8	Serine/arginine-rich splicing factor 2;Serine/arginine-rich splicing factor 8	Q01130;Q9BRL6	Q01130;Q9BRL6	RRM_1	4	4	4	21.7	21.7	21.7	25.476	0	14.689	149040000	9	18	15.3283	15.6008	17.7152	20.23	20.6929	21.3003	20.0878	17.0674	17.5299	20.5361	21.4478	20.0936	4.52633	1.80149	2.01361	0.761311	4.47777	1.88377	-2.51271	0.981979	-0.0485566	0.0323183	2.46416	0.982094
806	FABP5	Fatty acid-binding protein, epidermal	Q01469	Q01469	Lipocalin	3	3	3	14.1	14.1	14.1	15.164	0	9.3859	64584000	8	16	22.6827	22.7914	21.298	16.7282	17.1712	17.5564	16.5454	17.9612	15.306	16.7735	17.1752	14.8913	-5.10542	2.56825	-5.65315	2.23139	-5.97737	2.4658	0	NaN	0	NaN	0	NaN
810	EXOSC10	Exosome component 10	Q01780	Q01780	DNA_pol_A_exo1;HRDC;PMC2NT	9	9	9	10.7	10.7	10.7	100.83	0	29.626	191870000	55	46	17.566	15.7516	16.3487	19.5217	19.933	20.3767	20.0088	19.3795	18.9276	20.2463	20.1126	19.632	3.38839	1.90948	2.88321	1.80133	3.44156	1.82173	-0.505174	0.556375	0.0531731	0.0592411	0.558347	0.664926
812	EWSR1	RNA-binding protein EWS	Q01844	Q01844	zf-RanBP	3	3	3	5.8	5.8	5.8	68.477	0	19.828	93473000	17	30	16.767	17.0731	16.7248	20.0842	20.2634	20.4803	17.6384	15.4506	15.4282	20.0653	19.9287	15.2145	3.421	4.55705	0	NaN	1.54784	0.362308	-4.10357	1.55265	-1.87316	0.442518	2.23041	0.52459
815	RPL18A	60S ribosomal protein L18a	Q02543	Q02543	Ribosomal_L18ae	10	10	10	43.2	43.2	43.2	20.762	0	170.25	16874000000	9	337	16.518	21.1718	16.5247	25.9351	25.6748	24.8928	27.1293	26.6185	26.9517	26.0077	25.611	26.0383	7.42941	1.43874	8.82835	1.54492	7.81418	1.44048	1.39894	1.52488	0.384773	0.456719	-1.01416	2.1136
817	PLOD1	Procollagen-lysine,2-oxoglutarate 5-dioxygenase 1	Q02809	Q02809	2OG-FeII_Oxy	8	8	8	10.6	10.6	10.6	83.549	0	21.56	136960000	44	34	17.8589	15.6878	16.665	19.6478	19.9078	20.0768	16.8879	15.9959	19.2402	20.0419	20.0556	19.8721	3.1402	1.47461	0.637415	0.211458	3.2526	1.46467	-2.50278	0.919711	0.112405	0.320736	2.61519	0.94525
818	RPL6	60S ribosomal protein L6	Q02878	Q02878	Ribosomal_L6e;Ribosomal_L6e_N	18	18	18	37.8	37.8	37.8	32.728	0	184.24	45575000000	13	520	20.5179	22.3048	19.0886	27.0386	27.4628	27.2662	26.183	26.7995	27.3149	26.9938	26.8879	26.6244	6.61875	1.74947	6.12868	1.84609	6.19822	1.6864	-0.49006	0.568496	-0.420528	1.19606	0.0695318	0.0675813
826	EIF4G1	Eukaryotic translation initiation factor 4 gamma 1	Q04637	Q04637;REV__Q8NEG2	MA3;MIF4G;W2	43	43	38	26.1	26.1	23	175.49	0	293.79	2020200000	68	309	16.7128	14.3672	17.3594	22.0814	21.9519	21.8145	21.577	21.5162	21.7127	21.8271	21.8863	21.4895	5.80278	1.63816	5.4555	1.58084	5.58784	1.62458	-0.347274	1.5888	-0.214935	0.643608	0.132338	0.38987
828	SSBP1	Single-stranded DNA-binding protein, mitochondrial	Q04837	Q04837	SSB	4	4	4	27	27	27	17.259	0	81.009	447510000	8	45	19.7848	21.8969	16.2109	21.6597	21.4243	20.8521	20.8673	20.6166	20.7042	21.6212	21.5995	21.1877	2.01455	0.458044	1.43185	0.319474	2.17194	0.494182	-0.582691	0.900336	0.157392	0.215773	0.740083	1.73144
829	YWHAH	14-3-3 protein eta	Q04917	Q04917	14-3-3	12	10	10	44.7	37.4	37.4	28.218	0	161.63	2653900000	16	140	16.7066	15.9678	16.0192	21.0365	20.7479	20.3903	23.0987	22.1022	22.3572	23.9673	24.1444	23.1621	4.49369	3.76801	6.28819	3.95368	7.52675	4.22215	1.7945	1.95512	3.03307	2.65095	1.23856	1.36126
830	EXOSC9	Exosome complex component RRP45	Q06265	Q06265	RNase_PH;RNase_PH_C	9	9	9	26.2	26.2	26.2	48.948	0	119.34	299590000	16	65	16.0149	16.14	15.576	20.2016	19.9186	19.1909	18.2715	19.9848	20.151	20.1393	19.8185	21.0048	3.86009	2.92137	3.55886	1.68337	4.41061	2.74004	-0.301238	0.164407	0.550513	0.517839	0.851751	0.518116
833	FMR1	Fragile X mental retardation protein 1	Q06787	Q06787	Agenet;FXR1P_C;KH_1	17	15	15	29.3	25	25	71.174	0	77.745	1230800000	33	130	16.6955	17.5732	16.4549	22.2257	22.4155	22.5851	22.8116	22.6164	22.5164	22.2187	22.5162	22.3108	5.50092	2.70977	5.74025	2.66767	5.4407	2.62116	0.239327	0.81308	-0.0602194	0.166525	-0.299547	1.14075
834	PRDX1	Peroxiredoxin-1	Q06830	Q06830;Q13162	1-cysPrx_C;AhpC-TSA	7	7	6	33.2	33.2	27.6	22.11	0	30.97	330600000	15	63	18.0111	20.8884	15.3655	20.3438	18.5775	19.2614	18.8158	18.9633	20.7102	18.541	17.8749	20.9174	1.30588	0.296716	1.40812	0.319714	1.02277	0.210923	0.102235	0.0437198	-0.28311	0.0939425	-0.385344	0.126316
835	RPL18	60S ribosomal protein L18	Q07020	Q07020	Ribosomal_L18e	8	8	8	35.6	35.6	35.6	21.634	0	178.99	24921000000	7	394	16.0756	21.4256	16.7027	26.1239	26.0563	25.5791	26.2201	26.7393	26.8816	26.3625	26.0796	26.0996	7.8518	1.37657	8.54569	1.45223	8.11259	1.39423	0.693893	1.22262	0.260791	0.567777	-0.433102	0.819745
837	CKAP4	Cytoskeleton-associated protein 4	Q07065	Q07065		10	10	10	21.4	21.4	21.4	66.022	0	55.704	172870000	38	47	16.4458	16.3127	16.652	19.9797	19.3268	16.0304	16.3276	19.6882	18.8148	20.3431	20.1046	20.1577	1.97544	0.607473	1.80668	0.670332	3.73161	4.8201	-0.168765	0.0360079	1.75617	0.541963	1.92493	0.708968
838	KHDRBS1	KH domain-containing, RNA-binding, signal transduction-associated protein 1	Q07666	Q07666;O75525;Q5VWX1	KH_1	3	3	3	7.4	7.4	7.4	48.227	0	7.9976	99032000	11	15	15.8809	15.8098	17.4108	19.0788	19.4843	17.0356	16.0457	20.3481	19.4539	19.7238	19.2687	19.6698	2.16575	1.06304	2.24874	0.653395	3.18693	1.70414	0.0829957	0.0179431	1.02118	0.510053	0.938188	0.260381
839	SRSF1	Serine/arginine-rich splicing factor 1	Q07955	Q07955	RRM_1	9	9	9	33.5	33.5	33.5	27.744	0	61.774	645390000	13	162	17.0821	16.7334	15.894	20.7556	21.2553	20.829	21.8097	20.8973	21.2611	20.815	21.0522	20.5727	4.37678	2.66569	4.75285	3.20887	4.24345	2.54588	0.376075	0.518599	-0.133333	0.253673	-0.509408	0.728927
841	DHX9	ATP-dependent RNA helicase A	Q08211	Q08211	DEAD;dsrm;HA2;Helicase_C;OB_NTP_bind	29	29	29	24.4	24.4	24.4	140.96	0	323.31	3570200000	61	333	16.0659	16.9841	16.8019	22.7654	22.8702	22.1401	23.507	23.3645	23.3857	22.4644	22.5867	22.6257	5.9746	3.98231	6.80181	2.86817	5.94162	2.76331	0.827213	1.19836	-0.0329717	0.0460031	-0.860184	3.6828
845	SSRP1	FACT complex subunit SSRP1	Q08945	Q08945	HMG_box;Rtt106;SSrecog	13	13	13	20.2	20.2	20.2	81.074	0	82.232	446010000	30	89	15.7173	17.1645	15.5573	21.083	21.3518	20.4348	19.7793	19.547	20.0486	21.3199	21.3321	21.3145	4.8102	2.46375	3.64528	1.86125	5.17579	2.01743	-1.16492	1.5007	0.365589	0.506827	1.53051	2.05649
846	NSUN2	tRNA (cytosine(34)-C(5))-methyltransferase	Q08J23	Q08J23	Nol1_Nop2_Fmu	11	11	11	17.7	17.7	17.7	86.47	0	61.112	140630000	44	37	16.3073	16.197	16.382	18.5998	18.5821	15.6533	15.4371	16.87	16.9449	20.7062	19.9728	20.548	1.31636	0.507345	0.121973	0.082298	4.11361	2.73185	-1.19438	0.447809	2.79725	1.01244	3.99164	2.18842
847	RBBP4	Histone-binding protein RBBP4	Q09028	Q09028	CAF1C_H4-bd;WD40	9	9	4	18.4	18.4	9.9	47.655	0	79.288	160400000	14	55	15.5207	16.2234	16.4203	19.4836	19.023	19.391	18.7173	18.8341	19.1265	19.8451	19.1455	19.9851	3.2444	2.73652	2.83785	2.46342	3.60374	3.17011	-0.406553	1.01986	0.359343	0.510513	0.765896	1.09538
848	NCBP1	Nuclear cap-binding protein subunit 1	Q09161	Q09161	MIF4G;MIF4G_like;MIF4G_like_2	10	10	10	15.2	15.2	15.2	91.838	0	56.205	331060000	34	94	17.5115	16.4405	16.0025	20.1908	20.0511	20.5336	19.235	18.9393	19.1822	20.449	20.0556	20.1494	3.60697	2.01775	2.46732	1.56168	3.56651	1.94923	-1.13965	2.34198	-0.0404593	0.0763229	1.09919	2.63111
849	AP1B1	AP-1 complex subunit beta-1	Q10567	Q10567	Adaptin_N;Alpha_adaptinC2;B2-adapt-app_C	9	9	4	10.2	10.2	4.8	104.64	0	25.063	138020000	44	42	16.7932	16.3501	15.5735	19.1216	18.9576	19.7623	19.0249	18.4092	18.3907	19.2827	19.292	19.6396	3.04153	2.47634	2.36933	2.06531	3.1658	2.12964	-0.672209	0.970749	0.124269	0.167314	0.796478	1.38149
850	CPSF1	Cleavage and polyadenylation specificity factor subunit 1	Q10570	Q10570	CPSF_A	11	11	11	9.1	9.1	9.1	160.88	0	54.64	112490000	69	31	15.9185	17.4908	16.8853	18.1637	18.0834	16.6372	19.4543	18.6458	18.4831	18.4721	18.2478	18.4557	0.863231	0.567804	2.09618	1.61207	1.62697	1.17049	1.23294	0.937941	0.763737	0.581472	-0.469207	0.592579
851	TBL3	Transducin beta-like protein 3	Q12788	Q12788	Utp13;WD40	11	11	11	17.8	17.8	17.8	89.034	0	128.9	296940000	45	56	16.9951	16.5241	15.7822	19.8584	19.8344	19.3315	20.397	20.051	19.9383	19.9596	19.6193	20.0255	3.24096	2.37314	3.69496	2.38819	3.43433	2.2597	0.453999	0.952162	0.193373	0.377221	-0.260626	0.627217
852	GTF3C1	General transcription factor 3C polypeptide 1	Q12789	Q12789	B-block_TFIIIC	19	19	19	10	10	10	238.87	0	73.429	217390000	110	57	17.0092	14.9416	17.2049	19.1497	19.3137	19.5892	18.3891	18.6506	17.7082	19.6215	19.7639	19.0552	2.9656	1.29375	1.86405	0.960519	3.09492	1.38487	-1.10155	1.37632	0.129322	0.193712	1.23087	1.54864
856	CHD3	Chromodomain-helicase-DNA-binding protein 3	Q12873	Q12873	CHDCT2;CHDNT;Chromo;DUF1086;DUF1087;Helicase_C;PHD;SNF2_N	2	1	1	1.3	0.8	0.8	226.59	0.0056926	2.8753	15087000	91	6	15.4301	16.1377	16.0753	16.2323	16.9839	16.1415	16.8148	17.2183	16.391	18.2546	16.961	17.1403	0	NaN	0.926969	1.31795	1.57093	1.39816	0.355416	0.422629	0.99938	0.924412	0.643964	0.588914
857	SF3A3	Splicing factor 3A subunit 3	Q12874	Q12874	DUF3449;SF3a60_bindingd	5	5	5	11.8	11.8	11.8	58.848	0	14.604	34406000	24	24	15.7231	16.5492	18.474	17.8768	18.0663	15.8069	17.387	17.2504	17.3433	17.8177	17.541	17.8928	0.334546	0.111038	0.411463	0.177879	0.835044	0.383508	0.076917	0.0338052	0.500497	0.250349	0.42358	1.35118
859	AIMP1	Aminoacyl tRNA synthase complex-interacting multifunctional protein 1;Endothelial monocyte-activating polypeptide 2	Q12904	Q12904	tRNA_bind	8	8	8	28.5	28.5	28.5	34.352	0	41.458	86990000	17	34	16.893	15.5571	16.6597	18.3809	19.0914	18.1819	15.948	18.4479	19.0641	17.8815	18.2107	19.0548	2.18149	1.80269	1.45005	0.576065	2.01242	1.67051	-0.731448	0.277424	-0.169074	0.139997	0.562374	0.204373
860	ILF2	Interleukin enhancer-binding factor 2	Q12905	Q12905	DZF	10	10	10	26.7	26.7	26.7	43.062	0	120.53	1376800000	19	178	16.0789	16.1888	16.7215	22.7799	22.7823	22.1369	22.0775	22.8265	22.674	22.0216	22.208	22.6917	6.23666	4.52301	6.19629	4.40812	5.97739	4.5362	-0.0403684	0.0439268	-0.259261	0.369793	-0.218892	0.291316
861	ILF3	Interleukin enhancer-binding factor 3	Q12906	Q12906	dsrm;DZF	27	27	23	31.7	31.7	27.9	95.337	0	323.31	8231500000	37	537	17.0616	17.9546	16.3229	23.8561	23.7791	23.3704	23.1022	23.0699	23.1789	23.6118	23.1766	23.1985	6.5555	2.57716	6.00398	2.22695	6.21595	2.49159	-0.55152	1.21167	-0.33955	0.754073	0.21197	0.567861
862	PTPN13	Tyrosine-protein phosphatase non-receptor type 13	Q12923	Q12923	FERM_C;FERM_M;FERM_N;PDZ;Y_phosphatase	20	20	19	8.7	8.7	8.5	276.9	0	54.928	142450000	128	39	15.9175	15.6757	17.3113	18.9676	18.7492	18.7038	14.9494	17.8509	18.2416	19.3738	19.3141	19.676	2.50537	1.44211	0.712458	0.234505	3.15309	1.67691	-1.79291	0.646221	0.647718	1.92968	2.44063	0.848892
867	NFX1	Transcriptional repressor NF-X1	Q12986	Q12986	R3H;zf-NF-X1	16	16	16	19.4	19.4	19.4	124.39	0	148.01	176670000	62	56	16.6024	16.5422	16.3588	19.1831	18.8572	18.8705	19.523	19.2947	18.8947	19.1808	19.1069	18.8157	2.4691	3.97771	2.73631	2.79644	2.53331	3.89318	0.267212	0.534817	0.0642115	0.1559	-0.203	0.388749
870	ACACA	Acetyl-CoA carboxylase 1;Biotin carboxylase	Q13085	Q13085;O00763	ACC_central;Biotin_carb_C;Biotin_lipoyl;Carboxyl_trans;CPSase_L_chain;CPSase_L_D2	38	38	38	17.4	17.4	17.4	265.55	0	141.78	677130000	120	197	14.7433	16.863	15.8732	20.1691	19.8001	19.4213	17.78	19.6509	19.4526	20.2307	20.0395	20.4149	3.97035	1.83061	3.13468	1.67145	4.4019	1.78425	-0.83567	0.533269	0.431549	0.760385	1.26722	0.78938
873	PPFIA1	Liprin-alpha-1	Q13136	Q13136	SAM_1;SAM_2	6	6	6	7	7	7	135.78	0	24.327	73164000	59	26	16.8771	16.8707	16.3227	18.3373	18.06	17.8679	19.2613	18.6938	18.0947	18.9996	18.6615	18.6404	1.39821	2.3277	1.99305	1.89155	2.07698	2.83584	0.594847	0.672854	0.678775	1.69516	0.0839284	0.0799118
878	PSMD2	26S proteasome non-ATPase regulatory subunit 2	Q13200	Q13200	PC_rep	8	8	8	8	8	8	100.2	0	48.741	93879000	49	30	16.2369	16.307	15.4948	16.5452	15.783	15.5715	19.2044	18.0654	18.5161	18.304	17.4572	18.6162	0	NaN	2.58239	2.36883	2.11289	2.00633	2.62871	2.37247	2.15922	2.01888	-0.469492	0.417109
880	NME3	Nucleoside diphosphate kinase 3	Q13232	Q13232	NDK	3	3	3	23.7	23.7	23.7	19.015	0	29.577	73668000	10	15	14.7566	14.8856	15.4898	16.7928	15.8443	16.5851	19.6398	19.4018	19.0838	16.0318	17.2767	16.2367	0	NaN	4.33112	3.72134	0	NaN	2.96773	2.61737	0	NaN	-2.86003	2.04174
881	SRSF9	Serine/arginine-rich splicing factor 9	Q13242	Q13242	RRM_1	9	9	9	37.6	37.6	37.6	25.542	0	40.562	372630000	15	39	16.9212	15.8667	16.5421	20.8323	21.0539	20.7619	16.8836	20.6812	20.5647	20.9299	20.6114	20.355	4.43935	2.55758	2.93316	0.866563	4.18873	2.94986	-1.50619	0.455411	-0.250619	0.562384	1.25557	0.376471
883	SRSF6	Serine/arginine-rich splicing factor 6	Q13247	Q13247;Q08170	RRM_1	6	6	5	14.5	14.5	11.9	39.586	0	25.969	317630000	15	39	17.4728	17.6244	17.0059	20.7533	21.1836	16.9038	20.9746	20.7218	21.3937	21.3352	21.0079	20.2604	2.24586	0.62137	3.66234	3.7586	3.50012	2.73873	1.41648	0.389982	1.25427	0.341062	-0.162218	0.160678
884	TRIM28	Transcription intermediary factor 1-beta	Q13263	Q13263	PHD;zf-B_box;zf-RING_5	11	11	11	20	20	20	88.549	0	66.358	225020000	32	59	14.8637	15.9671	16.3229	19.5081	19.5036	17.2109	19.9405	19.4952	19.1069	19.7623	19.4779	20.0203	3.02293	1.42141	3.7963	2.3731	4.03556	2.19919	0.773372	0.37472	1.01264	0.500937	0.239264	0.338301
885	G3BP1	Ras GTPase-activating protein-binding protein 1	Q13283	Q13283	NTF2;RRM_1	16	16	14	40.6	40.6	38	52.164	0	188.39	1103900000	22	239	15.3822	16.778	17.5736	21.7319	21.9328	22.7949	20.3585	20.7364	21.0257	21.1779	20.514	22.0056	5.57525	2.3364	4.12892	1.77894	4.65454	2.23835	-1.44632	1.56119	-0.920706	0.771684	0.525618	0.451928
886	PABPC4	Polyadenylate-binding protein 4	Q13310	Q13310;P0CB38	PABP;RRM_1	22	13	12	33.7	20.8	19.4	70.782	0	79.181	4325200000	32	145	16.4053	16.2794	15.3898	25.1989	24.9827	24.7972	24.6926	24.8081	24.8566	24.469	24.3804	24.8169	8.96807	3.41663	8.76089	2.97275	8.53059	3.50417	-0.207181	0.679955	-0.437482	1.15679	-0.230302	0.658322
887	EIF3I	Eukaryotic translation initiation factor 3 subunit I	Q13347	Q13347	WD40	10	10	10	33.2	33.2	33.2	36.501	0	175.45	3397400000	19	209	16.58	16.5196	16.2017	22.7406	22.7325	22.3273	22.9912	23.4061	23.3027	22.9323	22.7252	22.5769	6.16641	5.27016	6.7996	5.60257	6.31107	5.57512	0.633188	1.56891	0.144655	0.348201	-0.488532	1.38733
889	TARBP1	Probable methyltransferase TARBP1	Q13395	Q13395	SpoU_methylase	8	8	8	5.8	5.8	5.8	181.67	0	29.652	59728000	89	24	15.9142	16.9859	17.2603	18.2712	17.3596	14.7126	18.1175	18.2233	18.2026	18.4185	16.6629	17.8381	0.0609659	0.0171256	1.46095	1.15577	0.919653	0.621217	1.39999	0.494983	0.858687	0.281389	-0.5413	0.393015
890	DYNC1I2	Cytoplasmic dynein 1 intermediate chain 2	Q13409	Q13409	Dynein_IC2;WD40	3	3	3	7.7	7.7	7.7	71.456	0	12.724	51239000	20	14	16.3632	15.347	16.9104	18.7636	16.4343	15.9441	18.3999	17.787	17.912	18.6159	17.2475	18.7991	0.840485	0.342173	1.82608	1.37226	2.01396	1.39786	0.985592	0.42609	1.17347	0.493763	0.18788	0.126498
892	TCOF1	Treacle protein	Q13428	Q13428	Treacle	29	29	29	26.6	26.6	26.6	152.1	0	190.77	573500000	76	123	17.8254	15.6867	17.2152	20.6921	21.065	20.8018	18.6018	18.8819	18.8159	20.7899	20.8767	20.7529	3.94385	1.65094	1.85744	1.011	3.89739	1.59703	-2.08641	3.75088	-0.0464598	0.141134	2.03995	3.4326
893	SF3B2	Splicing factor 3B subunit 2	Q13435	Q13435	DUF382;PSP;SAP	12	12	12	16.4	16.4	16.4	100.23	0	42.746	466060000	45	66	17.6871	16.9928	14.7703	20.9513	20.9708	20.6422	21.0526	20.9225	21.0246	20.9619	20.8919	20.7167	4.37138	1.43745	4.51648	1.44766	4.37342	1.42762	0.145107	0.514974	0.00204023	0.00513977	-0.143067	0.743181
901	KRR1	KRR1 small subunit processome component homolog	Q13601	Q13601	KH_1	7	7	7	18.1	18.1	18.1	43.664	0	26.407	136010000	17	29	17.6138	15.9229	17.1363	19.1283	19.2217	18.7498	20.0746	19.34	19.7285	18.8256	19.008	19.3082	2.14228	1.37467	2.82337	1.73742	2.15627	1.37702	0.681095	1.18892	0.0139923	0.0231998	-0.667103	1.16832
907	THOC5	THO complex subunit 5 homolog	Q13769	Q13769	FimP	4	4	4	5.9	5.9	5.9	78.507	0	10.647	65008000	35	18	16.7368	15.7168	17.4301	17.8801	18.313	18.4736	18.1715	18.9173	18.9937	18.6877	18.8913	18.8221	1.59438	1.14464	2.06629	1.46468	2.17251	1.32928	0.471912	0.657967	0.57813	1.15458	0.106218	0.137948
908	GNL2	Nucleolar GTP-binding protein 2	Q13823	Q13823	MMR_HSR1;NGP1NT	9	9	9	13	13	13	83.654	0	30.667	79752000	33	20	16.9663	15.0695	16.3178	19.0955	18.8306	17.1591	18.4812	19.1086	18.7587	16.4813	18.5849	17.7824	2.24383	1.27537	2.66493	1.50742	1.49834	0.837863	0.421097	0.247963	-0.745495	0.360589	-1.16659	0.720254
912	EXOSC2	Exosome complex component RRP4	Q13868	Q13868	ECR1_N	5	5	5	14.7	14.7	14.7	32.789	0	21.844	323440000	14	55	16.7896	16.2866	16.57	20.6859	20.5252	20.3716	20.6641	20.632	20.6075	20.3824	20.4309	21.0326	3.97881	4.09067	4.08579	2.95032	4.06659	3.7215	0.106984	0.444398	0.0877806	0.137734	-0.0192038	0.0290444
914	BYSL	Bystin	Q13895	Q13895	Bystin	9	9	9	19.7	19.7	19.7	49.601	0	72.094	230310000	25	39	16.5638	17.0162	16.5903	19.7184	19.7127	19.5869	20.5609	19.8964	19.8201	19.2404	19.4451	19.4716	2.9492	2.90712	3.36899	3.16007	2.66224	3.24228	0.419795	0.67088	-0.286959	1.41729	-0.706753	1.07483
915	CDK13	Cyclin-dependent kinase 13	Q14004	Q14004	Pkinase	9	9	8	8.4	8.4	7.9	164.92	0	24.525	118610000	67	29	16.8982	17.326	16.4224	18.3187	15.8633	17.9373	17.4099	20.4609	20.4756	19.2273	18.498	19.0649	0.490875	0.226107	2.56658	0.919343	2.04787	2.37083	2.07571	0.735124	1.55699	0.768312	-0.518715	0.177484
916	CKAP5	Cytoskeleton-associated protein 5	Q14008	Q14008	CLASP_N;HEAT	8	8	8	4.6	4.6	4.6	225.49	0	29.272	69771000	106	31	17.5838	15.7358	17.0855	18.8448	18.5437	17.7545	16.1258	16.7713	16.7187	18.8391	18.9644	18.6653	1.57931	1.07472	-0.26311	0.160846	2.02123	1.19471	-1.84242	1.88361	0.441928	0.515093	2.28434	2.49124
919	HNRNPD	Heterogeneous nuclear ribonucleoprotein D0	Q14103	Q14103	CBFNT;RRM_1	2	2	2	6.8	6.8	6.8	38.434	0	29.091	441090000	13	42	15.8053	15.7164	15.9277	22.0634	22.2053	21.8226	16.3198	19.0335	19.3673	22.0735	22.0036	21.6752	6.21393	4.85456	2.4237	0.892522	6.10092	4.52275	-3.79023	1.24146	-0.113013	0.272762	3.67722	1.21957
920	BOP1	Ribosome biogenesis protein BOP1	Q14137	Q14137	BOP1NT;WD40	6	6	6	7.2	7.2	7.2	83.629	0	22.013	36808000	34	14	16.5062	16.2238	16.9844	16.5796	17.3144	16.1602	18.1549	17.4831	17.944	17.7577	16.4344	15.9106	0.113288	0.0996224	1.28923	1.89683	0.12945	0.0742135	1.17594	1.28268	0.0161619	0.0081374	-1.15978	0.798751
922	EIF3A	Eukaryotic translation initiation factor 3 subunit A	Q14152	Q14152	PCI	60	60	60	34.8	34.8	34.8	166.57	0	323.31	7510600000	58	589	15.889	17.6962	16.8325	23.4322	23.2496	23.5684	24.3013	23.9711	24.3575	23.6939	23.5145	23.5416	6.61083	2.29731	7.40408	2.4647	6.77741	2.2639	0.793245	2.11585	0.166581	0.672743	-0.626664	1.68456
923	UBAP2L	Ubiquitin-associated protein 2-like	Q14157	Q14157	DUF3697	16	16	16	21	21	21	114.53	0	247.46	839700000	29	136	16.376	15.8923	17.2338	20.7564	20.9634	20.9033	21.7788	21.7959	21.9199	21.219	21.4836	21.0995	4.37363	2.16375	5.33082	2.30803	4.76664	2.39413	0.957194	3.41068	0.39301	1.26974	-0.564184	1.58819
925	DCTN1	Dynactin subunit 1	Q14203	Q14203	CAP_GLY;Dynactin	7	7	7	5.1	5.1	5.1	141.69	0	29.176	52039000	62	23	16.4839	16.6151	17.3964	18.037	17.5106	18.3366	18.12	18.0304	17.8904	17.8389	18.3151	18.1339	1.12961	1.39448	1.18177	1.32728	1.26417	1.52231	0.0521641	0.0695457	0.13456	0.180344	0.0823956	0.19983
926	DYNC1H1	Cytoplasmic dynein 1 heavy chain 1	Q14204	Q14204	AAA_5;AAA_8;DHC_N1;DHC_N2;Dynein_heavy;MT	28	28	28	6.4	6.4	6.4	532.4	0	77.832	160120000	257	92	17.1096	17.2116	14.8478	18.4201	18.101	16.8904	17.3513	18.1844	18.8707	17.9607	16.4311	18.7662	1.41416	0.684556	1.74577	0.857229	1.32967	0.572165	0.331605	0.199301	-0.0844968	0.0341975	-0.416102	0.19357
927	EIF4A2	Eukaryotic initiation factor 4A-II;Eukaryotic initiation factor 4A-II, N-terminally processed	Q14240	Q14240	DEAD;Helicase_C	12	5	5	27.3	14.3	14.3	46.402	0	19.641	110220000	23	23	16.5217	16.4636	17.4786	19.417	19.2135	16.8415	18.9564	16.276	19.0821	19.2785	18.7873	18.6398	1.66934	0.768136	1.28352	0.531046	2.08054	2.0017	-0.385817	0.113408	0.411203	0.172771	0.79702	0.321038
928	TCEB3	Transcription elongation factor B polypeptide 3	Q14241	Q14241	Elongin_A;Med26	7	7	7	9	9	9	89.908	0	27.539	101380000	37	29	16.1397	16.1279	16.9237	18.7846	19.293	17.1277	18.9324	18.4871	18.8824	19.1927	19.4776	19.2936	2.00466	1.11786	2.37023	2.41	2.92422	2.34224	0.365566	0.197009	0.919561	0.531624	0.553995	1.41929
933	CAPRIN1	Caprin-1	Q14444	Q14444	Caprin-1_C	12	12	12	22.6	22.6	22.6	78.365	0	291.28	4685900000	21	204	17.7768	18.8181	17.1245	25.4948	25.3959	25.0985	22.7227	22.4478	22.1464	25.1923	24.8091	24.9362	7.4233	2.53569	4.53252	2.17492	7.07275	2.47176	-2.89077	3.57231	-0.350543	1.00209	2.54023	3.32843
934	RBM39	RNA-binding protein 39	Q14498	Q14498;Q86U06	RBM39linker;RRM_1	7	7	7	18.3	18.3	18.3	59.379	0	25.443	74504000	24	34	16.7225	16.459	16.3312	18.8906	18.9287	15.7257	19.1973	19.0586	18.9046	19.1676	19.3174	19.4649	1.34409	0.478101	2.54924	3.97351	2.81237	4.14338	1.20515	0.427272	1.46828	0.522277	0.263131	1.0254
938	TRIP12	E3 ubiquitin-protein ligase TRIP12	Q14669	Q14669	HECT	4	4	4	2.8	2.8	2.8	220.43	0	10.646	7691100	98	11	16.1773	16.6355	15.7819	16.489	16.7531	16.1034	16.7958	16.448	17.7908	16.8088	17.1344	16.2494	0	NaN	0.813298	0.758242	0.532637	0.677012	0.563061	0.524176	0.282401	0.364944	-0.280661	0.226299
939	PUM1;PUM2	Pumilio homolog 1;Pumilio homolog 2	Q14671;Q8TB72	Q14671;Q8TB72	PUF	3	3	3	2.6	2.6	2.6	126.47	0	9.2802	36639000	39	9	16.833	17.9412	16.8246	19.1773	18.7667	19.5004	16.4932	16.2632	17.302	18.7868	18.5564	18.4536	1.94854	1.76048	0	NaN	1.39935	1.25729	-2.462	2.34185	-0.549192	0.974369	1.91281	1.72973
941	SMC1A	Structural maintenance of chromosomes protein 1A	Q14683	Q14683	SMC_hinge;SMC_N	38	38	38	32.6	32.6	32.6	143.23	0	193.55	1264400000	72	188	15.7262	15.333	15.7836	21.3151	21.3144	20.9877	16.6966	18.467	18.9086	21.7251	21.6187	21.1505	5.5915	4.95189	2.40981	1.18829	5.88385	4.71506	-3.18168	1.40578	0.292356	0.610977	3.47404	1.53376
942	RRP1B	Ribosomal RNA processing protein 1 homolog B	Q14684	Q14684	Nop52	16	16	16	25.6	25.6	25.6	84.427	0	105.16	329190000	33	75	16.3452	16.2208	15.6816	19.7933	19.7225	18.7045	20.7356	19.4782	19.5292	19.1218	19.2306	18.112	3.32421	2.52564	3.8318	2.40442	2.73892	2.24531	0.507581	0.395414	-0.585296	0.51256	-1.09288	0.934647
944	BMS1	Ribosome biogenesis protein BMS1 homolog	Q14692	Q14692	AARP2CN;DUF663	6	6	6	5	5	5	145.81	0	19.83	66060000	51	15	15.9693	15.0274	15.8091	16.8034	17.1639	15.4617	16.6119	19.42	18.5796	18.1168	17.8345	18.1408	0	NaN	2.60189	1.12075	2.42877	2.0758	1.72748	0.778367	1.55436	1.04315	-0.17312	0.0680449
945	USP10	Ubiquitin carboxyl-terminal hydrolase 10	Q14694	Q14694	UCH	14	14	14	19.3	19.3	19.3	87.133	0	150.59	899710000	37	172	15.6675	15.2842	16.5465	21.0841	20.9355	20.6116	22.2234	21.9493	21.9292	20.5356	20.7196	21.045	5.04434	2.63926	6.20123	2.64883	4.93401	2.65981	1.15689	2.43037	-0.110332	0.209349	-1.26723	2.43784
947	CHD4	Chromodomain-helicase-DNA-binding protein 4	Q14839	Q14839;Q8TDI0	CHDCT2;CHDNT;Chromo;DUF1086;DUF1087;Helicase_C;PHD;SNF2_N	7	7	6	4	4	3.6	218	0	13.246	27346000	89	17	17.5178	17.8846	16.0574	18.3004	18.0112	18.3708	15.6329	15.4733	16.2898	15.6549	16.0711	17.0588	1.07414	0.720463	0	NaN	0	NaN	-2.42875	2.37724	-1.96583	1.45771	0	NaN
950	NOLC1	Nucleolar and coiled-body phosphoprotein 1	Q14978	Q14978	SRP40_C	5	5	5	9.3	9.3	9.3	73.602	0	22.174	196450000	33	24	15.4121	17.7038	16.957	20.2791	20.7111	16.879	17.8671	19.0972	16.8536	20.9675	21.0296	20.5393	2.5988	0.813035	1.24833	0.596392	4.15452	1.67842	-1.35047	0.401185	1.55571	0.484927	2.90618	1.39638
952	CUL7	Cullin-7	Q14999	Q14999;Q8IWT3	APC10;Cul7;Cullin	10	10	10	6.2	6.2	6.2	191.16	0	28.661	133880000	78	44	16.3685	15.6689	15.4636	18.3665	18.5578	18.7103	19.2682	18.2437	18.337	18.5672	18.7482	18.5145	2.71119	2.28717	2.78261	2.49903	2.77626	2.17585	0.0714238	0.0699969	0.0650749	0.204113	-0.00634893	0.00592311
959	SART3	Squamous cell carcinoma antigen recognized by T-cells 3	Q15020	Q15020	Lsm_interact;RRM_1	8	8	8	11.5	11.5	11.5	109.93	0	75.068	97109000	51	20	15.6072	16.1587	15.7146	19.0566	19.1312	20.9649	18.2391	17.9177	18.401	15.7353	18.9642	19.2186	3.89067	1.72109	2.35907	3.2978	2.14586	0.713564	-1.53161	0.89525	-1.74482	0.57917	-0.213212	0.0618397
961	EXOSC7	Exosome complex component RRP42	Q15024	Q15024	RNase_PH;RNase_PH_C	9	9	9	33.7	33.7	33.7	31.821	0	58.093	394950000	18	53	16.1564	16.1463	16.3886	21.7158	21.5898	21.8129	21.555	21.625	20.8862	21.1489	16.359	21.8361	5.47574	5.94358	5.12494	3.07857	3.5509	0.75659	-0.350798	0.565708	-1.92483	0.420171	-1.57404	0.339251
962	EFTUD2	116 kDa U5 small nuclear ribonucleoprotein component	Q15029	Q15029	EFG_C;EFG_II;EFG_IV;GTP_EFTU;GTP_EFTU_D2	19	18	18	20.2	19.1	19.1	109.43	0	63.423	854640000	51	135	16.4668	16.3273	16.9891	20.4395	20.4034	19.9103	21.2114	20.9369	21.0542	20.6459	20.46	20.3674	3.65666	3.73111	4.47309	3.23709	3.89669	3.10826	0.816435	1.59346	0.240033	0.526039	-0.576402	2.13988
963	KARS	Lysine--tRNA ligase	Q15046	Q15046	tRNA_anti-codon;tRNA-synt_2	12	12	12	17.4	17.4	17.4	68.047	0	36.916	292670000	30	57	17.7904	16.4813	15.8518	19.9608	19.9382	15.4438	19.8524	20.1325	20.7335	20.4214	19.8651	20.3671	1.73978	0.431743	3.53162	1.87364	3.51003	1.73957	1.79185	0.449888	1.77025	0.444185	-0.0215963	0.0227497
972	NONO	Non-POU domain-containing octamer-binding protein	Q15233	Q15233	NOPS;RRM_1	20	20	19	42.3	42.3	40.6	54.231	0	103.96	3354100000	21	194	16.1181	15.4643	16.066	24.0383	24.6667	24.5034	21.0762	23.1653	22.4315	24.2613	24.0816	24.4223	8.51997	5.09993	6.34148	2.30753	8.37224	4.1432	-2.17849	1.22225	-0.147725	0.270416	2.03076	1.11632
974	PCBP1	Poly(rC)-binding protein 1	Q15365	Q15365	KH_1	6	6	4	22.8	22.8	14	37.497	0	30.479	299160000	17	32	16.9719	16.9846	16.551	21.1614	21.0509	21.3516	15.7747	20.7996	21.5421	21.5098	21.5676	21.7838	4.35216	4.23456	2.53633	0.528533	4.78458	4.28466	-1.81583	0.374949	0.432425	1.6297	2.24825	0.468109
977	SF3B3	Splicing factor 3B subunit 3	Q15393	Q15393	CPSF_A	19	19	19	17.5	17.5	17.5	135.58	0	101.35	799840000	52	209	17.9508	15.0177	15.9101	20.5493	20.3115	19.8168	20.9701	20.6726	20.7187	20.3562	20.0478	20.5283	3.93303	1.41183	4.49426	1.46747	4.0179	1.39161	0.561232	0.975225	0.0848694	0.118737	-0.476362	1.25176
979	SAFB	Scaffold attachment factor B1	Q15424	Q15424	SAP	11	11	6	13.4	13.4	6.3	102.64	0	52.515	183010000	34	55	16.7438	16.3268	16.8802	19.0676	19.1671	17.2449	18.8621	19.6044	19.0535	19.1905	19.1197	19.0593	1.84295	1.04772	2.5231	2.93628	2.47294	2.50441	0.680145	0.404531	0.629987	0.377258	-0.0501575	0.073773
980	SF3B4	Splicing factor 3B subunit 4	Q15427	Q15427	RRM_1	2	2	2	5.2	5.2	5.2	44.385	0	18.879	127490000	16	32	15.5926	16.702	16.7346	19.0891	19.7134	20.2216	16.7426	19.5334	19.214	19.508	19.8315	19.2544	3.33166	2.55713	2.15363	0.920794	3.18826	2.22721	-1.17803	0.503979	-0.143404	0.141011	1.03463	0.442081
981	SF3A1	Splicing factor 3A subunit 1	Q15459	Q15459	PRP21_like_P;Surp;ubiquitin	8	8	8	10	10	10	88.885	0	68.916	150730000	41	45	15.5608	16.0595	16.2209	19.6198	19.4429	19.7612	18.5221	18.6298	18.8059	19.0918	19.1602	19.2984	3.66094	3.18179	2.70553	2.7272	3.23644	2.71701	-0.955415	2.79894	-0.424501	1.62114	0.530914	2.07797
982	SKIV2L	Helicase SKI2W	Q15477	Q15477	DEAD;DSHCT;Helicase_C;rRNA_proc-arch	22	22	22	19.3	19.3	19.3	137.75	0	111.81	495940000	61	75	17.5441	17.6155	15.3328	17.3291	16.6412	16.6117	21.0485	21.2361	20.997	17.1538	16.9197	17.0992	0.0298748	0.0120681	4.26307	1.54419	0.226794	0.101737	4.23319	2.83017	0.196919	0.306099	-4.03628	5.62062
985	TARBP2	RISC-loading complex subunit TARBP2	Q15633	Q15633	dsrm	4	4	4	10.4	10.4	10.4	39.039	0	17.559	46765000	14	15	16.4429	16.1884	17.4917	18.7287	18.9313	16.8455	16.4687	15.3523	17.5831	18.4316	18.6261	19.4967	1.46082	0.829806	-0.239616	0.113217	2.14381	1.81404	-1.70043	0.854022	0.682988	0.370539	2.38342	1.333
990	TRIP4	Activating signal cointegrator 1	Q15650	Q15650	ASCH;zf-C2HC5	10	10	10	17.7	17.7	17.7	66.145	0	44.377	160900000	28	43	16.8462	16.9593	16.6737	19.2621	19.4522	16.4533	19.9805	20.0096	19.6585	19.4681	19.4104	19.7601	1.56279	0.606028	3.05645	4.30374	2.7198	4.21644	1.49367	0.581007	1.15701	0.4499	-0.336656	1.01156
993	ELAVL1	ELAV-like protein 1	Q15717	Q15717	RRM_1	10	10	9	30.7	30.7	27.9	36.091	0	52.215	727080000	16	67	16.29	15.84	16.2927	22.3761	22.7611	22.2428	17.1064	15.3175	19.0231	22.9934	22.5253	22.7726	6.31912	5.0836	1.00813	0.350609	6.62288	5.23801	-5.311	1.44486	0.30376	0.666329	5.61475	1.48529
997	DDB1	DNA damage-binding protein 1	Q16531	Q16531	CPSF_A	10	10	10	9.1	9.1	9.1	126.97	0	28.829	98941000	55	25	17.0071	17.1296	16.3285	18.5298	18.7771	16.4669	16.2451	17.0817	18.8776	18.2217	18.698	18.4576	1.10288	0.57221	0.579707	0.267772	1.63736	2.02691	-0.52317	0.187224	0.534481	0.26492	1.05765	0.515382
1000	RBBP7	Histone-binding protein RBBP7	Q16576	Q16576	CAF1C_H4-bd;WD40	7	2	2	14.6	6.1	6.1	47.82	0	20.112	47422000	16	15	16.4938	16.1802	16.1456	15.7247	15.9226	17.4336	16.8544	18.2253	17.1034	19.3946	17.7738	19.1137	0	NaN	1.12116	0.963264	2.48751	1.48128	1.03406	0.678496	2.40041	1.50484	1.36635	0.970829
1001	SRSF7	Serine/arginine-rich splicing factor 7	Q16629	Q16629	RRM_1	6	6	5	21.4	21.4	15.5	27.366	0	24.276	263820000	10	25	16.3576	18.3588	16.9096	20.8539	20.7587	16.3898	21.9148	21.4445	20.6437	20.5147	21.3474	20.7839	2.12547	0.545874	4.12566	2.14164	3.67334	1.82946	2.00018	0.514659	1.54787	0.393866	-0.452311	0.42616
1005	DECR1	2,4-dienoyl-CoA reductase, mitochondrial	Q16698	Q16698		7	7	7	18.8	18.8	18.8	36.067	0	23.163	568870000	22	58	15.5903	16.114	15.5334	20.9096	20.8247	20.3726	21.9432	21.5179	22.0312	20.8427	21.1231	20.6027	4.9564	4.39108	6.08486	4.7332	5.11023	4.4158	1.12846	2.09377	0.15383	0.274763	-0.974628	1.94991
1008	KNOP1	Lysine-rich nucleolar protein 1	Q1ED39	Q1ED39	SMAP	10	10	10	25.1	25.1	25.1	51.588	0	37.711	130290000	25	37	17.4167	17.2918	16.6999	19.2178	19.6942	18.9015	18.8438	18.1186	18.6256	18.2419	18.2948	17.9901	2.13502	2.58218	1.3932	1.97138	1.03947	1.55093	-0.741826	1.10573	-1.09555	1.55235	-0.353724	0.625523
1009	PDS5A	Sister chromatid cohesion protein PDS5 homolog A	Q29RF7	Q29RF7		4	3	3	4	3.4	3.4	150.83	0	10.784	10507000	75	8	16.1307	16.2658	16.6265	16.2801	14.7411	16.4417	16.4107	16.8942	16.3465	16.2259	16.5058	16.9838	0	NaN	0.20945	0.386585	0.230822	0.355167	0.729476	0.509402	0.750847	0.52239	0.0213718	0.0254011
1011	TSR1	Pre-rRNA-processing protein TSR1 homolog	Q2NL82	Q2NL82	AARP2CN;DUF663	9	9	9	12.4	12.4	12.4	91.809	0	34.073	208690000	33	70	16.3546	16.973	15.264	19.2523	19.145	19.4251	19.8322	19.3168	19.5823	18.9191	18.8335	18.6853	3.07695	1.63933	3.37989	1.82285	2.61546	1.48698	0.302935	0.771624	-0.461489	1.88157	-0.764424	1.66818
1013	SMU1	WD40 repeat-containing protein SMU1;WD40 repeat-containing protein SMU1, N-terminally processed	Q2TAY7	Q2TAY7	WD40	8	8	8	17.7	17.7	17.7	57.543	0	31.463	70300000	26	25	16.6964	16.3409	17.032	17.8999	18.3112	18.7096	17.3791	17.7973	18.3971	18.3518	18.21	17.4708	1.61717	2.1751	1.16812	1.43116	1.32111	1.68545	-0.449053	0.519469	-0.296061	0.339618	0.152992	0.140749
1015	TWISTNB	DNA-directed RNA polymerase I subunit RPA43	Q3B726	Q3B726	SHS2_Rpb7-N	4	4	4	12.7	12.7	12.7	37.432	0	39.372	44689000	15	17	15.6727	17.6925	16.9288	18.3902	18.7556	18.6866	18.8744	17.5528	18.1138	18.681	16.2586	18.2548	1.84616	1.07792	1.41566	0.901054	0.966805	0.432184	-0.430494	0.421189	-0.879352	0.443872	-0.448858	0.200657
1018	MAP7D1	MAP7 domain-containing protein 1	Q3KQU3	Q3KQU3	MAP7	9	9	9	15.8	15.8	15.8	92.819	0	31.745	104500000	37	45	17.2196	16.7793	15.6468	18.4982	18.2881	18.0816	19.0633	17.9247	17.5485	18.6102	18.5273	17.4613	1.74074	1.2402	1.63027	1.17299	1.65105	1.27101	-0.110465	0.0788381	-0.0896842	0.0779309	0.0207812	0.0116604
1019	LSM12	Protein LSM12 homolog	Q3MHD2	Q3MHD2	AD	3	3	3	22.6	22.6	22.6	21.701	0	18.153	114500000	9	39	16.3682	16.5348	18.0619	19.3724	19.3578	15.7212	20.5425	19.9952	19.3754	19.2566	16.4024	19.3894	1.16216	0.345566	2.9827	1.84838	1.36119	0.514596	1.82055	0.569208	0.199029	0.043479	-1.62152	0.633521
1020	TIMM50	Mitochondrial import inner membrane translocase subunit TIM50	Q3ZCQ8	Q3ZCQ8	NIF	3	3	3	11	11	11	39.646	0	16.324	24861000	14	13	17.1558	17.0224	17.1854	17.0642	17.0513	17.7118	17.2595	16.7389	17.0256	16.7997	16.836	16.9361	0.15458	0.255715	-0.113213	0.269458	-0.263951	1.78663	-0.267792	0.424894	-0.418531	0.717973	-0.150738	0.372174
1022	LARP7	La-related protein 7	Q4G0J3	Q4G0J3	La;RRM_1;RRM_3	15	15	15	30.6	30.6	30.6	66.898	0	123.15	237480000	28	61	16.6029	15.822	15.9651	18.7441	18.5415	19.1325	19.5756	20.1267	19.8527	18.7333	18.9621	18.0443	2.676	2.89565	3.72163	3.33293	2.44987	2.55882	1.04563	1.93946	-0.226125	0.27365	-1.27176	1.60289
1026	FAM98B	Protein FAM98B	Q52LJ0	Q52LJ0	DUF2465	5	5	5	19.7	19.7	19.7	37.19	0	187.31	587330000	15	54	16.7042	17.6696	17.5137	17.3714	17.4027	17.5039	21.9396	22.1454	22.1476	16.5735	17.0585	18.6065	0.13017	0.150533	4.78166	2.57738	0.117011	0.0579576	4.65149	5.23861	-0.0131594	0.00663402	-4.66465	1.79895
1027	PDCD4	Programmed cell death protein 4	Q53EL6	Q53EL6	MA3	11	11	11	26.2	26.2	26.2	51.735	0	40.977	116390000	23	27	16.2325	14.9095	17.1506	18.2221	18.0912	18.4868	17.4012	19.9509	19.8032	18.2153	17.5267	17.646	2.16916	1.1246	2.95424	1.28877	1.69845	0.961404	0.785085	0.353715	-0.470713	0.840771	-1.2558	0.576809
1032	USP39	U4/U6.U5 tri-snRNP-associated protein 2	Q53GS9	Q53GS9	UCH;zf-UBP	12	12	12	20	20	20	65.38	0	39.758	223490000	29	58	17.6765	16.9842	15.9198	19.1277	18.8268	18.154	19.9811	19.6107	20.0483	18.7975	18.7247	19.0576	1.84269	1.31709	3.01988	1.6675	1.99977	1.2627	1.17719	1.42718	0.15708	0.187881	-1.02011	2.30586
1033	PYCRL	Pyrroline-5-carboxylate reductase 3	Q53H96	Q53H96	F420_oxidored;P5CR_dimer	4	4	4	17.9	17.9	17.9	28.663	0	60.439	373440000	14	52	15.944	16.7785	16.1058	20.0445	20.2252	19.454	20.2051	19.3356	19.6016	19.9406	21.0482	20.8547	3.63179	3.31406	3.438	3.16088	4.3384	3.11331	-0.193789	0.217123	0.706614	0.76442	0.900402	0.965596
1037	ODF2	Outer dense fiber protein 2	Q5BJF6	Q5BJF6		3	3	3	5.1	5.1	5.1	95.4	0	11.458	6539300	42	9	16.1406	15.2095	16.4987	16.1519	16.1937	16.3753	17.2167	17.9755	16.1915	16.5327	16.774	16.9136	0.290699	0.275785	0	NaN	0.790494	0.774022	0.887583	0.644782	0.499795	1.58221	-0.387788	0.272505
1042	PRRC2B	Protein PRRC2B	Q5JSZ5	Q5JSZ5	BAT2_N	26	24	24	14.1	13.3	13.3	242.96	0	107.11	231790000	106	71	17.1059	17.3841	17.2292	19.1741	19.5699	19.5567	19.2238	19.5529	19.1775	19.4741	19.4311	19.0481	2.19383	3.39194	2.07832	3.54704	2.07801	3.21106	-0.115513	0.262236	-0.115829	0.243855	-0.000315984	0.000572444
1046	EXOSC6	Exosome complex component MTR3	Q5RKV6	Q5RKV6	RNase_PH	7	7	7	32	32	32	28.235	0	71.273	509000000	10	40	17.532	16.6657	15.9048	21.5141	21.1489	21.5095	16.5997	21.3524	21.449	22.1047	22.6098	22.0189	4.68999	2.15949	3.09952	0.731913	5.54361	2.52247	-1.59047	0.371431	0.853617	1.62657	2.44409	0.576009
1048	CEP170	Centrosomal protein of 170 kDa	Q5SW79	Q5SW79;Q96L14	CEP170_C;FHA	13	13	12	10.8	10.8	10.2	175.29	0	55.559	122610000	84	44	16.7521	16.5462	16.0575	18.9473	19.2397	19.532	19.4352	17.7651	17.6535	18.831	18.908	18.3912	2.78772	3.243	1.83271	1.13836	2.25814	2.89678	-0.955009	0.629781	-0.529583	1.06646	0.425426	0.266018
1051	GPATCH4	G patch domain-containing protein 4	Q5T3I0	Q5T3I0	G-patch	10	10	10	21.7	21.7	21.7	50.381	0	52.151	188980000	27	55	15.5618	15.7073	15.7881	19.5803	19.5677	17.6063	20.2858	18.9085	18.862	18.9637	19.1984	18.3624	3.23236	1.42466	3.66637	1.84101	3.15578	2.40328	0.434011	0.206658	-0.076582	0.0357201	-0.510593	0.392825
1052	UBAP2	Ubiquitin-associated protein 2	Q5T6F2	Q5T6F2	DUF3697;UBA	4	4	4	4.7	4.7	4.7	117.11	0	32.709	37648000	29	14	16.2301	16.272	16.0256	14.9255	15.1981	17.0701	16.9358	18.3346	16.5271	17.8809	17.818	18.4845	0	NaN	1.08994	0.738686	1.88524	2.16445	1.53462	0.809973	2.32992	1.19875	0.795303	0.550405
1055	ATAD3B;ATAD3A;ATAD3C	ATPase family AAA domain-containing protein 3B;ATPase family AAA domain-containing protein 3A;ATPase family AAA domain-containing protein 3C	Q5T9A4;Q9NVI7;Q5T2N8	Q5T9A4;Q9NVI7;Q5T2N8	AAA;DUF3523	7	7	7	9.6	9.6	9.6	72.572	0	16.571	101970000	34	23	15.9947	17.5915	15.8929	18.7454	18.3892	16.826	16.2281	18.5619	18.182	19.5172	18.1698	18.5291	1.49379	0.860491	1.16428	0.562633	2.24561	1.46532	-0.329514	0.129347	0.751816	0.444962	1.08133	0.55436
1060	CDC42BPA	Serine/threonine-protein kinase MRCK alpha	Q5VT25	Q5VT25	C1_1;CNH;DMPK_coil;Pkinase;Pkinase_C	5	5	5	3.3	3.3	3.3	197.3	0	10.164	13480000	83	14	16.537	16.479	16.5785	16.7989	16.9741	17.0276	17.1647	17.109	15.2596	17.0222	17.277	17.0523	0.402038	1.77499	0	NaN	0.585657	1.95773	-0.422458	0.244142	0.183619	0.796234	0.606078	0.361092
1066	FOCAD	Focadhesin	Q5VW36	Q5VW36	DUF3028;DUF3730	21	21	21	11.6	11.6	11.6	200.07	0	97.825	725800000	84	119	16.3658	16.0985	16.407	20.1224	19.9433	19.9288	21.5131	21.8093	21.5624	20.5489	20.5335	20.134	3.70774	4.63861	5.33785	5.62195	4.115	4.43352	1.63011	3.56184	0.407267	1.10943	-1.22285	2.54584
1068	RSBN1	Round spermatid basic protein 1	Q5VWQ0	Q5VWQ0		10	10	9	13.6	13.6	12.7	90.071	0	41.823	244780000	35	38	17.4456	16.3107	15.7532	19.7187	19.4989	19.5724	20.456	19.1922	19.1883	19.7804	20.1005	19.4252	3.09348	1.63105	3.10901	2.02314	3.26551	1.87966	0.0155315	0.0113753	0.17203	0.321859	0.156499	0.119267
1082	THOC7	THO complex subunit 7 homolog	Q6I9Y2	Q6I9Y2	THOC7	2	2	2	10.8	10.8	10.8	23.743	0	6.3906	15604000	13	7	15.5462	16.0358	16.0459	16.6226	18.1559	15.7812	17.9344	16.4386	16.7401	17.7664	18.3678	17.4302	0	NaN	0	NaN	1.97878	2.18516	0	NaN	1.00153	0.5452	0.817081	0.667393
1083	ELP2	Elongator complex protein 2	Q6IA86	Q6IA86	WD40	9	9	9	10.5	10.5	10.5	92.499	0	51.315	157590000	36	42	15.2024	17.1281	17.3834	20.1407	19.9644	20.333	19.9567	16.2439	19.6393	20.4203	20.6607	20.0678	3.57471	1.48708	2.04198	0.641981	3.81159	1.59536	-1.53273	0.486984	0.236883	0.496616	1.76961	0.562793
1089	DHX57	Putative ATP-dependent RNA helicase DHX57	Q6P158	Q6P158	DEAD;HA2;Helicase_C;OB_NTP_bind;RWD;zf-CCCH	34	34	32	23.2	23.2	21.7	155.6	0	212.46	1393500000	74	191	16.8825	15.8464	15.9428	20.9228	20.7844	20.686	22.1408	21.2405	21.1983	21.0137	20.9866	20.6534	4.57385	2.41242	5.30262	3.50985	4.66063	2.64588	0.728774	0.868872	0.0867825	0.250368	-0.641991	0.792176
1092	EDC4	Enhancer of mRNA-decapping protein 4	Q6P2E9	Q6P2E9		6	6	6	4.4	4.4	4.4	151.66	0	19.164	110180000	61	15	15.586	16.3034	16.3458	19.9375	19.4391	19.4447	16.7764	17.8963	17.5099	19.8182	19.323	18.8793	3.5287	3.22394	1.31581	1.43824	3.26174	3.03733	-2.21289	2.01631	-0.26696	0.340102	1.94593	1.95272
1094	PRPF8	Pre-mRNA-processing-splicing factor 8	Q6P2Q9	Q6P2Q9	JAB;PRO8NT;PROCN;PROCT;PRP8_domainIV;RRM_4;U5_2-snRNA_bdg;U6-snRNA_bdg	42	42	42	16.7	16.7	16.7	273.6	0	163	1370800000	127	254	15.4763	16.5684	15.9187	20.5941	20.442	19.983	21.2332	21.0024	21.3025	20.7987	20.5531	20.4861	4.35193	3.03126	5.19157	2.68733	4.62483	2.59352	0.839647	1.55825	0.272901	0.55492	-0.566746	1.90108
1095	FAHD1	Acylpyruvase FAHD1, mitochondrial	Q6P587	Q6P587	FAA_hydrolase	5	5	5	25	25	25	24.843	0	49.126	97886000	13	46	20.7894	22.1475	20.9422	20.6937	21.5362	19.1516	16.5336	20.9679	19.3582	19.802	19.0117	20.7488	-0.832531	0.4226	-2.33979	0.686365	-1.43883	1.01485	-1.50726	0.420598	-0.606303	0.281197	0.900956	0.24435
1096	RPL22L1	60S ribosomal protein L22-like 1	Q6P5R6	Q6P5R6	Ribosomal_L22e	1	1	1	9.8	9.8	9.8	14.606	0	9.9254	137770000	4	8	16.3162	16.6635	16.2642	15.7168	16.1111	16.6324	21.6334	20.8263	20.686	19.5552	17.522	19.5705	0	NaN	4.63397	2.90715	2.46797	1.19481	4.89515	3.57688	2.72914	1.36986	-2.166	1.16097
1097	RSBN1L	Round spermatid basic protein 1-like protein	Q6PCB5	Q6PCB5		9	8	8	9.9	9.1	9.1	94.868	0	22.411	150720000	37	22	15.9372	16.3688	15.2613	19.3552	19.5311	16.3212	19.5071	19.1219	19.4687	19.4854	19.6706	19.2448	2.54671	0.905483	3.51012	2.4156	3.61112	2.45041	0.963408	0.343769	1.06441	0.382366	0.101003	0.227474
1099	TTC37	Tetratricopeptide repeat protein 37	Q6PGP7	Q6PGP7	TPR_1;TPR_8	24	24	24	17	17	17	175.48	0	118.63	667880000	79	111	15.661	15.9882	17.2339	19.2418	19.079	18.3603	20.9232	21.1864	21.1296	19.3982	19.1884	19.513	2.59936	1.79597	4.78536	2.07252	3.07219	1.69524	2.186	1.99435	0.472831	0.664704	-1.71317	3.71852
1101	WDR59	WD repeat-containing protein 59	Q6PJI9	Q6PJI9	WD40	5	5	5	6.2	6.2	6.2	109.79	0	19.266	57611000	49	19	17.1055	16.6455	15.7166	18.8242	18.6295	17.6745	16.2353	17.9617	17.3899	18.1078	18.4435	18.1526	1.88686	1.58479	0.70645	0.466129	1.74545	1.36391	-1.18041	0.860634	-0.141412	0.133979	1.039	0.762383
1103	LARP1	La-related protein 1	Q6PKG0	Q6PKG0	La	20	20	19	25	25	24.3	123.51	0	137.44	1844000000	60	202	16.4368	16.1673	17.2222	22.6289	22.5831	22.7686	23.2038	23.0285	23.1649	22.902	22.4953	22.5785	6.05146	2.67407	6.52369	2.73277	6.04987	3.06226	0.472233	2.44105	-0.00159136	0.0037268	-0.473824	1.33788
1104	MTHFD1L	Monofunctional C1-tetrahydrofolate synthase, mitochondrial	Q6UB35	Q6UB35	FTHFS;THF_DHG_CYH;THF_DHG_CYH_C	7	7	7	8.8	8.8	8.8	105.79	0	16.585	49875000	51	16	17.5328	17.0932	17.7184	18.0257	17.4683	16.518	14.5506	16.2663	18.1173	18.4519	18.1422	18.6616	-0.11081	0.0793317	-1.13674	0.414666	0.970411	1.77889	-1.02593	0.362754	1.08122	0.91475	2.10715	0.757108
1105	FIP1L1	Pre-mRNA 3-end-processing factor FIP1	Q6UN15;A0A0B4J203	Q6UN15;A0A0B4J203	Fip1;Pkinase_Tyr	4	4	4	9.6	9.6	9.6	66.526	0	33.79	97313000	24	35	16.6261	15.4134	16.8852	18.5931	18.6283	16.6744	18.9765	19.1586	18.99	18.8348	18.8722	19.1578	1.65702	0.95245	2.73342	1.60445	2.64669	1.62696	1.0764	0.625874	0.989672	0.579334	-0.0867271	0.291194
1106	GIGYF2	PERQ amino acid-rich with GYF domain-containing protein 2	Q6Y7W6	Q6Y7W6	GYF	67	67	67	42.6	42.6	42.6	150.07	0	323.31	114760000000	51	2196	17.7853	16.6124	16.0265	27.4704	27.6079	27.2614	27.8149	27.9878	27.8768	27.5885	27.7215	28.5407	10.6385	2.76573	11.0851	2.69968	11.1422	3.64461	0.446553	1.52774	0.50364	0.643817	0.0570876	0.0621512
1107	LIN28B	Protein lin-28 homolog B	Q6ZN17	Q6ZN17	CSD;zf-CCHC	6	6	6	31.2	31.2	31.2	27.083	0	16.695	63643000	16	17	15.9075	16.8714	16.6943	19.1109	18.919	19.5131	16.4121	16.6593	16.2444	19.2673	19.7043	18.5006	2.68989	2.48484	0	NaN	2.66631	2.31835	-2.74237	3.38173	-0.0235806	0.0195422	2.71879	2.00147
1111	ACAD11	Acyl-CoA dehydrogenase family member 11	Q709F0	Q709F0;A0A0J9YXS1	Acyl-CoA_dh_1;Acyl-CoA_dh_M;Acyl-CoA_dh_N;APH	11	11	11	15.1	15.1	15.1	87.282	0	90.889	635170000	40	110	16.9898	17.2969	17.756	20.2844	20.0226	20.0033	20.8933	20.8461	21.1308	20.4257	20.206	20.1737	2.75589	2.60218	3.60921	2.88459	2.9209	2.57755	0.853319	2.59884	0.165009	0.613409	-0.68831	2.34506
1113	LARP4	La-related protein 4	Q71RC2	Q71RC2	La	13	13	13	24.9	24.9	24.9	80.595	0	122.96	689010000	26	151	16.1505	17.3085	16.7098	20.3788	20.3145	20.6	21.4736	21.0742	21.2874	20.656	20.2746	19.9114	3.70816	2.26324	4.5555	2.59954	3.55776	2.75956	0.847335	2.27634	-0.150403	0.245317	-0.997737	1.59541
1115	SND1	Staphylococcal nuclease domain-containing protein 1	Q7KZF4	Q7KZF4	SNase;TUDOR	30	30	30	34.7	34.7	34.7	102	0	323.31	5894300000	53	430	16.5637	16.2095	15.5956	22.7777	22.5846	22.4483	23.6728	23.1985	23.56	22.5993	22.5361	22.5996	6.48059	3.13672	7.35416	3.71787	6.45542	2.73961	0.87357	1.99399	-0.0251662	0.0866377	-0.898736	1.64868
1116	MARK2	Serine/threonine-protein kinase MARK2	Q7KZI7	Q7KZI7	KA1;Pkinase	11	11	8	18.4	18.4	14.1	87.91	0	70.469	233950000	44	49	16.2932	16.8324	16.642	19.8408	19.7075	19.5801	19.9368	19.4895	19.2241	19.7799	19.9876	19.5205	3.12029	3.29839	2.96094	3.2999	3.17347	3.90219	-0.159349	0.273852	0.0531724	0.123309	0.212521	0.349571
1120	DHX30	Putative ATP-dependent RNA helicase DHX30	Q7L2E3	Q7L2E3	DEAD;HA2;Helicase_C;OB_NTP_bind	37	37	37	30.2	30.2	30.2	133.94	0	233.61	3223600000	75	406	15.5059	17.6525	16.7104	21.4969	21.4707	20.773	22.157	22.1087	22.2427	21.6614	21.1898	21.143	4.62394	2.005	5.54655	1.91869	4.7085	1.90425	0.922609	1.24721	0.0845515	0.104504	-0.838057	1.50538
1121	EIF3M	Eukaryotic translation initiation factor 3 subunit M	Q7L2H7	Q7L2H7	PCI	10	10	10	31.6	31.6	31.6	42.502	0	71.506	636930000	18	128	16.6205	16.5532	16.1756	21.2146	20.748	20.195	21.9785	21.9401	21.9788	20.7555	20.3516	21.1974	4.26938	2.90216	5.51599	3.24268	4.31837	3.35464	1.24661	1.2895	0.0489883	0.0435756	-1.19762	1.41086
1124	ZNF771	Zinc finger protein 771	Q7L3S4	Q7L3S4	zf-C2H2	5	5	5	18.9	18.9	18.9	35.702	0	13.709	62131000	19	14	15.4519	17.4374	16.1589	16.7858	15.3947	16.7292	17.6838	18.0236	15.9623	19.0473	19.5022	18.5188	0	NaN	0.873844	0.433	2.67338	1.56319	0.91999	0.506157	2.71953	1.95035	1.79954	1.05
1126	PHF5A	PHD finger-like domain-containing protein 5A	Q7RTV0	Q7RTV0	PHF5	3	3	3	32.7	32.7	32.7	12.405	0	28.477	129270000	8	15	16.561	15.9669	16.9192	19.4151	19.6381	17.6104	20.494	19.471	19.4997	19.626	19.0875	18.2343	2.40552	1.32032	3.33924	2.74451	2.50025	2.01367	0.933716	0.541462	0.0947291	0.0420275	-0.838987	0.724226
1128	TRMT1L	TRMT1-like protein	Q7Z2T5	Q7Z2T5	TRM	20	20	20	36.7	36.7	36.7	81.746	0	304.27	1331600000	40	198	17.3511	16.7051	16.7492	21.8566	22.0164	21.9227	21.9274	22.0306	22.0669	22.2305	21.9249	21.5971	4.99678	2.95201	5.07314	2.93102	4.98237	4.19666	0.0763594	0.539123	-0.0144068	0.024398	-0.0907663	0.172468
1129	ZC3HAV1	Zinc finger CCCH-type antiviral protein 1	Q7Z2W4	Q7Z2W4	PARP	23	23	23	32.6	32.6	32.6	101.43	0	216.75	807630000	57	195	16.8537	16.0203	16.707	20.7732	20.7911	20.2912	20.645	20.656	20.3093	21.1274	20.7758	20.4145	4.09148	3.33525	4.00974	2.93816	4.24556	3.56246	-0.0817413	0.151671	0.154083	0.228483	0.235825	0.411965
1133	NUFIP2	Nuclear fragile X mental retardation-interacting protein 2	Q7Z417	Q7Z417		19	19	19	36.1	36.1	36.1	76.12	0	323.31	1133600000	26	184	16.7909	19.1289	16.7204	20.7389	21.0301	20.5941	21.5839	21.1671	21.4038	20.6293	20.7114	20.5898	3.24097	1.28859	3.8382	1.42792	3.09673	1.22734	0.597225	1.55859	-0.144245	0.421964	-0.74147	1.72783
1135	DHX29	ATP-dependent RNA helicase DHX29	Q7Z478	Q7Z478	DEAD;HA2;Helicase_C;OB_NTP_bind	17	16	16	13.6	12.8	12.8	155.23	0	85.916	456890000	71	111	15.7943	16.1432	15.4606	20.07	20.1035	20.2449	20.5978	19.6959	19.8484	20.3406	20.1432	20.2301	4.34015	2.95821	4.24804	3.36141	4.43863	3.01574	-0.0921084	0.111015	0.0984853	0.557023	0.190594	0.246281
1139	HDGFRP2	Hepatoma-derived growth factor-related protein 2	Q7Z4V5	Q7Z4V5	LEDGF;PWWP	6	6	6	9.1	9.1	9.1	74.316	0	35.897	146860000	33	26	15.2956	16.4699	16.178	20.2047	21.1808	19.4224	15.7708	16.3815	17.1623	20.4368	20.3804	19.8715	4.28815	2.46159	0.457067	0.354353	4.24843	2.74322	-3.83108	2.3162	-0.0397193	0.0237394	3.79136	2.34877
1141	RBBP6	E3 ubiquitin-protein ligase RBBP6	Q7Z6E9	Q7Z6E9	DWNN;zf-CCHC	6	6	6	4	4	4	201.56	0	35.145	306940000	76	22	16.1857	16.1181	16.3019	17.4196	15.5177	15.5937	21.5451	21.2598	20.5526	21.0118	20.7762	20.2952	0	NaN	4.91732	2.55428	4.49254	2.89329	4.94217	2.18513	4.51739	1.93447	-0.424782	0.504853
1147	MTDH	Protein LYRIC	Q86UE4	Q86UE4		15	15	15	29.7	29.7	29.7	63.836	0	55.62	229000000	24	55	17.5427	17.6733	15.2368	20.3894	20.1178	20.5225	19.9174	19.9696	19.6889	20.2011	20.3267	19.6035	3.52564	1.35536	3.04104	1.22243	3.22616	1.33323	-0.484601	1.46257	-0.29948	0.494486	0.18512	0.297979
1148	ZNF598	Zinc finger protein 598	Q86UK7	Q86UK7		15	15	15	19.5	19.5	19.5	98.636	0	60.353	184610000	44	60	17.5038	17.1682	16.7362	19.164	19.1396	19.2825	17.9293	17.4967	15.7128	19.057	19.217	20.384	2.05931	2.03113	-0.0897884	0.0411613	2.41655	1.85295	-2.1491	1.06437	0.357243	0.315696	2.50634	1.35019
1149	KTN1	Kinectin	Q86UP2	Q86UP2		17	17	17	14.1	14.1	14.1	156.27	0	61.187	176980000	83	54	16.0513	15.5182	16.7161	19.4923	19.3899	19.5495	18.1531	18.5224	17.068	20.1367	19.6399	19.0279	3.38203	2.02914	1.81935	1.47758	3.50629	2.74562	-1.56268	1.16535	0.124257	0.132548	1.68694	1.3968
1153	ZC3H18	Zinc finger CCCH domain-containing protein 18	Q86VM9	Q86VM9		7	7	7	10.8	10.8	10.8	106.38	0	37.699	105490000	43	17	17.9375	16.1935	16.5811	17.3928	15.6075	15.5272	20.6097	20.0554	19.4676	18.3349	18.7957	16.6895	0	NaN	3.14018	1.94007	1.03597	0.549666	3.86841	1.9766	1.76421	0.933631	-2.1042	1.21194
1156	THOC6	THO complex subunit 6 homolog	Q86W42	Q86W42	WD40	5	5	5	16.1	16.1	16.1	37.535	0	33.791	64807000	18	22	16.7686	17.6553	17.3334	18.434	18.4763	17.0249	16.2834	18.8194	18.6918	18.6937	18.9285	18.5928	0.725939	0.566876	0.679059	0.298799	1.48585	1.73023	-0.0468795	0.0160718	0.759907	0.603136	0.806786	0.365034
1160	SPATS2	Spermatogenesis-associated serine-rich protein 2	Q86XZ4	Q86XZ4	DUF1387	6	6	6	13.4	13.4	13.4	59.544	0	63.999	211930000	27	33	17.5404	16.3341	15.2338	19.2588	19.6685	19.9999	21.1894	19.971	19.902	19.9478	20.1057	19.2681	3.27299	1.52973	3.9847	1.95129	3.40446	1.61232	0.711709	0.642925	0.131466	0.145671	-0.580243	0.502086
1161	GATAD2A	Transcriptional repressor p66-alpha	Q86YP4	Q86YP4;Q8WXI9		4	4	4	7.7	7.7	7.7	68.062	0	20.721	32076000	38	12	16.9141	16.5139	18.9262	18.8313	17.123	18.2001	17.8151	17.3682	16.0594	18.8076	19.0569	18.7805	0.600075	0.263262	0	NaN	1.43022	0.712362	-0.970589	0.59842	0.830147	0.627897	1.80074	1.14151
1164	ERC1	ELKS/Rab6-interacting/CAST family member 1	Q8IUD2	Q8IUD2;O15083	Cast;RBD-FIP	8	8	8	9.3	9.3	9.3	128.08	0	17.778	17746000	55	17	16.2693	16.5996	16.6104	17.2724	16.6787	15.9042	16.0806	17.5804	16.9465	17.5441	17.2838	18.0161	0.125366	0.104626	0.376091	0.317634	1.12159	1.72902	0.250725	0.159907	0.996229	0.952335	0.745504	0.649583
1168	MAP7D3	MAP7 domain-containing protein 3	Q8IWC1	Q8IWC1	MAP7	5	5	5	6.3	6.3	6.3	98.428	0	14.816	27201000	44	11	17.7081	16.2534	17.4047	15.9398	18.3442	17.1267	16.6694	17.3365	16.1343	18.5875	18.5781	17.4141	0.0148083	0.00583351	-0.408686	0.292099	1.07117	0.839269	-0.423495	0.204803	1.05636	0.564547	1.47986	1.32002
1169	ZC3H7A	Zinc finger CCCH domain-containing protein 7A	Q8IWR0	Q8IWR0	zf-CCCH	4	4	4	4	4	4	110.54	0	9.513	31807000	47	10	17.3477	16.5073	16.9889	15.9719	15.7702	16.0497	15.6842	15.8612	15.0392	18.9735	18.6479	19.039	0	NaN	0	NaN	1.93884	2.21239	0	NaN	2.95619	4.06008	3.35859	2.83794
1170	PHF6	PHD finger protein 6	Q8IWS0	Q8IWS0		8	8	8	21.4	21.4	21.4	41.29	0	51.206	187850000	21	39	16.5249	17.4113	16.3737	19.7704	19.6936	19.4891	17.4786	19.2287	19.0631	19.989	19.7639	20.3166	2.88104	2.05187	1.82015	1.21053	3.25318	2.4972	-1.0609	0.709461	0.37214	0.880794	1.43304	0.940917
1171	CHERP	Calcium homeostasis endoplasmic reticulum protein	Q8IWX8	Q8IWX8	CTD_bind;G-patch;Surp	6	6	6	6.1	6.1	6.1	103.7	0	30.483	60650000	33	16	16.9265	16.8445	16.1593	15.9391	16.1935	16.8057	15.3198	17.0436	18.8483	19.4699	19.2869	19.3695	0	NaN	0.427162	0.1431	2.732	2.22777	0.757778	0.269046	3.06262	2.26977	2.30484	0.819124
1177	DNAJC10	DnaJ homolog subfamily C member 10	Q8IXB1	Q8IXB1	DnaJ;Thioredoxin	5	5	5	5.2	5.2	5.2	91.079	0	18.912	39599000	33	19	16.8308	17.5545	16.808	17.9301	17.9736	15.2775	15.9029	15.9568	17.152	18.7594	18.7496	18.3054	-0.00401624	0.00135622	-0.727189	0.66511	1.54037	2.00809	-0.723173	0.285997	1.54439	0.65171	2.26756	1.68553
1180	SMC5	Structural maintenance of chromosomes protein 5	Q8IY18	Q8IY18	SMC_N	6	6	6	5.9	5.9	5.9	128.81	0	16.177	37667000	55	19	16.2142	15.9962	17.5354	18.131	18.1914	16.1448	16.3182	17.6614	17.4194	18.5369	18.303	18.4563	0.907159	0.468514	0.551074	0.36163	1.85013	1.2313	-0.356085	0.167677	0.942972	0.529678	1.29906	1.07424
1181	DHX37	Probable ATP-dependent RNA helicase DHX37	Q8IY37	Q8IY37	DEAD;HA2;Helicase_C;OB_NTP_bind	5	5	5	4.6	4.6	4.6	129.54	0	33.995	40181000	54	16	17.564	17.9971	15.454	15.7861	16.7408	15.5642	16.2744	17.0855	18.1205	18.4663	19.3609	17.9096	0	NaN	0.155091	0.0558926	1.57391	0.759965	1.12974	0.78381	2.54856	1.96895	1.41882	0.961077
1186	XRN1	5-3 exoribonuclease 1	Q8IZH2	Q8IZH2	XRN_N	6	6	6	4.7	4.7	4.7	194.1	0	15.802	39747000	77	16	16.949	16.4647	15.5755	17.7112	18.1812	18.116	16.8117	15.0136	14.7135	18.0977	18.254	18.5302	1.67308	1.39355	0	NaN	1.96421	1.51915	-2.48984	1.24735	0.291132	0.679367	2.78097	1.32985
1187	PELP1	Proline-, glutamic acid- and leucine-rich protein 1	Q8IZL8	Q8IZL8	NUC202;RIX1	10	10	10	11.9	11.9	11.9	119.7	0	37.878	133430000	38	46	16.9842	15.6442	17.1493	19.9915	19.6368	17.1487	18.8925	19.4572	19.2443	19.6624	19.2747	19.0029	2.33311	0.985883	2.60544	1.65137	2.72079	1.74023	0.272325	0.101688	0.387679	0.148856	0.115354	0.172693
1190	PUSL1	tRNA pseudouridine synthase-like 1	Q8N0Z8	Q8N0Z8	PseudoU_synth_1	2	2	2	9.6	9.6	9.6	33.232	0	7.4307	35930000	15	14	15.1704	15.861	15.6874	16.3149	16.7058	17.2934	19.0767	18.1425	18.218	16.6372	16.3254	16.0583	0	NaN	2.90615	2.66645	0	NaN	1.70773	1.83779	0	NaN	-2.13876	2.13687
1194	ASCC3	Activating signal cointegrator 1 complex subunit 3	Q8N3C0	Q8N3C0	DEAD;Helicase_C;Sec63	39	39	39	18.5	18.5	18.5	251.46	0	168.19	1312700000	120	267	16.8319	16.7995	16.6874	20.6986	20.6484	20.605	21.0576	20.803	20.7075	20.7077	20.7273	20.8471	3.87776	5.77427	4.08311	3.95333	3.98777	6.46177	0.20535	0.73933	0.110015	0.95069	-0.095335	0.329452
1196	FNBP4	Formin-binding protein 4	Q8N3X1	Q8N3X1	WW	4	4	4	4	4	4	110.26	0	25.908	34071000	30	11	16.5535	16.2387	15.6619	17.7217	15.8522	15.2613	17.9974	19.1774	18.3327	16.0189	17.3644	17.0885	0	NaN	2.35112	2.14037	0	NaN	2.22412	1.1123	0	NaN	-1.67855	1.4307
1197	FBXW8	F-box/WD repeat-containing protein 8	Q8N3Y1	Q8N3Y1	F-box;WD40	5	5	5	9	9	9	67.393	0	15.813	26945000	23	20	18.0746	16.771	17.2328	16.7352	17.4282	16.9115	15.9722	17.456	17.6359	17.7718	17.4388	17.6809	-0.334476	0.3045	-0.338128	0.198401	0.271031	0.25541	-0.00365194	0.00203797	0.605507	1.08478	0.609159	0.435138
1200	SRBD1	S1 RNA-binding domain-containing protein 1	Q8N5C6	Q8N5C6	S1;Tex_N	18	18	18	17.7	17.7	17.7	111.77	0	54.696	175530000	59	72	16.5159	15.9057	17.1608	19.2873	19.2928	19.5268	16.5496	17.7796	17.9024	19.03	19.1166	18.6343	2.84151	1.89332	0.883073	0.711183	2.3995	1.90764	-1.95844	1.38223	-0.442006	1.11267	1.51643	1.22343
1206	PDCD7	Programmed cell death protein 7	Q8N8D1	Q8N8D1		4	4	4	9.3	9.3	9.3	54.699	0	10.652	33909000	22	19	15.5559	16.0113	15.6962	16.5612	18.114	16.8901	17.4217	15.9167	16.7338	17.9957	18.7151	18.4126	1.43395	1.0765	0	NaN	2.61998	3.00206	-0.497698	0.317069	1.18603	0.945977	1.68373	1.3713
1210	ASCC1	Activating signal cointegrator 1 complex subunit 1	Q8N9N2	Q8N9N2	AKAP7_NLS;KH_1	8	8	8	19.8	19.8	19.8	45.509	0	25.182	373760000	18	49	16.0275	16.7595	16.7586	20.0543	20.1836	20.5308	16.6206	20.2825	20.6189	20.9863	21.5871	20.909	3.74104	3.19162	2.65881	0.770831	4.64564	3.81339	-1.08223	0.312073	0.904603	1.51111	1.98684	0.586467
1211	KRI1	Protein KRI1 homolog	Q8N9T8	Q8N9T8	Kri1;Kri1_C	9	9	9	14.8	14.8	14.8	82.597	0	103.39	216860000	27	39	17.6813	16.2608	16.417	19.3147	19.3971	19.4669	20.7129	19.7723	19.7057	19.512	19.7886	18.7	2.60654	1.56007	3.27727	2.25969	2.54714	1.90053	0.670732	0.761618	-0.0593999	0.0589434	-0.730132	0.724977
1214	SERBP1	Plasminogen activator inhibitor 1 RNA-binding protein	Q8NC51	Q8NC51	HABP4_PAI-RBP1	29	29	29	64.5	64.5	64.5	44.965	0	311.46	16893000000	18	662	22.1744	23.8215	22.713	26.131	26.5574	26.7244	25.6226	25.6502	25.0524	25.5864	25.5162	24.5302	3.56796	1.97408	2.53874	1.64893	2.30794	1.66502	-1.02922	1.75292	-1.26002	1.33403	-0.230801	0.224864
1215	FAM98A	Protein FAM98A	Q8NCA5	Q8NCA5	DUF2465	9	9	9	24.3	24.3	24.3	55.4	0	148.58	518590000	23	93	15.9123	16.5004	15.8587	20.9987	21.0849	20.5087	21.183	21.6557	21.6455	20.4451	20.2468	21.0826	4.77364	4.14703	5.40429	4.27892	4.50101	3.69426	0.630648	1.23703	-0.272623	0.363471	-0.903271	1.31508
1222	TNRC6A	Trinucleotide repeat-containing gene 6A protein	Q8NDV7	Q8NDV7;Q9HCJ0	Ago_hook	5	5	5	3.8	3.8	3.8	210.29	0	15.299	27035000	84	17	16.2339	15.6756	16.4659	16.6667	18.2063	15.6335	17.474	17.2099	16.8049	17.368	17.8798	17.5994	0.710407	0.350213	1.03781	1.54374	1.49063	2.03346	0.327407	0.149663	0.780222	0.390615	0.452815	0.845595
1223	ABCF1	ATP-binding cassette sub-family F member 1	Q8NE71	Q8NE71	ABC_tran	17	17	17	24.5	24.5	24.5	95.925	0	183.62	622670000	37	98	17.3934	16.293	15.414	20.5247	20.664	20.9765	21.9346	20.6057	21.271	20.6114	20.9352	20.4788	4.35492	1.87784	4.90362	2.47033	4.30834	1.87067	0.5487	0.542328	-0.0465794	0.0868817	-0.59528	0.590013
1229	DDX55	ATP-dependent RNA helicase DDX55	Q8NHQ9	Q8NHQ9	DEAD;DUF4217;Helicase_C	8	8	8	14.8	14.8	14.8	68.546	0	20.168	71443000	33	22	17.5063	14.8187	17.2553	18.3663	18.4144	16.5362	15.5303	16.1855	18.5732	18.3131	18.4443	17.9706	1.24556	0.508851	0.236264	0.065237	1.71589	0.744002	-1.0093	0.374243	0.470335	0.276439	1.47963	0.603724
1232	WDR36	WD repeat-containing protein 36	Q8NI36	Q8NI36	Utp21;WD40	7	7	7	8.3	8.3	8.3	105.32	0	25.649	32897000	45	17	16.0983	15.8556	16.8077	16.1637	16.4372	15.4504	16.2531	17.2302	17.2823	18.0548	19.0159	18.8284	0	NaN	0.668006	0.687574	2.37915	2.35665	0.904806	0.945767	2.61595	2.48593	1.71114	1.72062
1234	WDR48	WD repeat-containing protein 48	Q8TAF3	Q8TAF3	DUF3337;WD40	4	4	4	8.7	8.7	8.7	76.21	0	25.02	48447000	34	19	15.0681	15.3474	16.7211	18.0905	18.2635	16.2608	18.519	16.1591	17.4814	18.2099	18.308	17.9539	1.82608	1.03106	1.67433	0.897141	2.44508	1.43978	-0.151747	0.0559382	0.619005	0.35994	0.770752	0.424603
1237	DDX54	ATP-dependent RNA helicase DDX54	Q8TDD1	Q8TDD1	DBP10CT;DEAD;Helicase_C	12	12	12	13.5	13.5	13.5	98.594	0	96.676	448200000	46	51	17.047	16.9217	15.4175	19.2949	19.6487	20.2769	21.5577	21.2004	21.0301	19.8193	19.9295	18.8306	3.27809	1.96364	4.8007	2.1228	3.06441	1.93639	1.5226	1.75555	-0.213683	0.179105	-1.73628	1.62269
1238	BRIX1	Ribosome biogenesis protein BRX1 homolog	Q8TDN6	Q8TDN6	Brix	6	6	6	19.5	19.5	19.5	41.401	0	16.361	34039000	20	18	16.8058	18.0465	16.4916	15.6905	17.8257	15.7577	17.5321	17.8568	18.347	16.9833	16.241	17.1041	0	NaN	0.797366	0.635067	-0.338526	0.23884	1.48738	0.801088	0.351483	0.169793	-1.13589	1.45765
1242	GEMIN5	Gem-associated protein 5	Q8TEQ6	Q8TEQ6	WD40	32	32	32	23.5	23.5	23.5	168.59	0	223.16	1146100000	81	232	15.9399	16.3283	16.8038	21.3532	21.1585	20.4354	19.9059	19.5493	20.3251	21.8031	21.5603	21.1802	4.62502	3.57602	3.56942	3.32757	5.15718	3.85383	-1.0556	1.35168	0.532158	0.70616	1.58776	2.22137
1247	DIS3L	DIS3-like exonuclease 1	Q8TF46	Q8TF46		23	23	23	21.3	21.3	21.3	120.79	0	178.4	896740000	59	130	16.752	15.7741	17.5243	21.5052	21.4277	21.2774	20.4948	20.8678	20.7516	21.5411	21.1747	21.7989	4.71997	1.98668	4.02129	1.90466	4.82146	2.23831	-0.698675	2.0176	0.101493	0.192814	0.800168	1.56037
1250	PPIL4	Peptidyl-prolyl cis-trans isomerase-like 4	Q8WUA2	Q8WUA2	Pro_isomerase;RRM_1	6	6	6	11.4	11.4	11.4	57.224	0	16.826	38752000	26	16	16.4742	16.9839	15.0094	17.9761	17.6416	18.2876	16.2486	17.6677	17.4938	17.7947	17.839	18.402	1.81261	1.09267	0.980887	0.582781	1.85608	1.11768	-0.831727	0.709294	0.0434634	0.0555154	0.875191	0.746287
1251	GTF3C2	General transcription factor 3C polypeptide 2	Q8WUA4	Q8WUA4	WD40	7	7	7	8.5	8.5	8.5	100.68	0	17.294	89915000	32	20	15.1469	16.0799	16.6614	18.3905	18.5692	15.7448	17.4272	16.7674	17.896	19.143	18.4301	18.6067	1.60545	0.667337	1.40081	1.16472	2.76386	1.91513	-0.204638	0.0711553	1.15841	0.479501	1.36305	1.49408
1262	ATXN2L	Ataxin-2-like protein	Q8WWM7	Q8WWM7	LsmAD;PAM2;SM-ATX	23	23	23	26	26	26	113.37	0	106.59	1139600000	39	184	16.6838	17.4629	16.74	20.9112	20.9694	20.7245	21.7072	21.1492	21.1677	21.0903	20.8673	20.5988	3.9061	2.6513	4.37909	3.59557	3.88986	3.17547	0.472989	0.966228	-0.0162354	0.0335635	-0.489225	0.972476
1271	IFT81	Intraflagellar transport protein 81 homolog	Q8WYA0	Q8WYA0		4	4	4	6.5	6.5	6.5	79.745	0	11.74	41186000	41	8	17.0993	15.5041	16.328	18.2234	18.2834	18.2721	16.874	17.5684	17.1294	15.984	18.387	18.4473	1.94915	1.28952	0.880143	0.728228	1.29566	0.594355	-1.06901	1.47843	-0.653495	0.296649	0.415514	0.178076
1273	DDX1	ATP-dependent RNA helicase DDX1	Q92499	Q92499	DEAD;Helicase_C;SPRY	24	24	24	35.7	35.7	35.7	82.431	0	235.76	5650900000	39	384	17.0643	15.3565	17.1005	22.6969	22.6426	22.3144	23.706	24.1838	24.0039	22.8224	22.5827	22.7749	6.04424	2.15514	7.4575	2.39288	6.21958	2.11476	1.41327	2.77472	0.175348	0.534743	-1.23792	2.38238
1274	H1FX	Histone H1x	Q92522	Q92522	Linker_histone	5	5	5	30.5	30.5	30.5	22.487	0	29.177	186480000	11	33	15.1321	16.8441	16.5861	21.0264	20.6062	18.8099	20.6874	15.9377	20.4594	19.6052	19.5857	19.099	3.96005	1.93743	2.84074	0.698499	3.24254	1.73003	-1.11931	0.252597	-0.717513	0.394672	0.401797	0.0862719
1279	MRPS27	28S ribosomal protein S27, mitochondrial	Q92552	Q92552	MRP-S27	5	5	5	15.9	15.9	15.9	47.611	0	102.62	93537000	25	20	17.5657	17.3269	16.3162	18.3892	18.3675	19.6593	20.5087	19.5418	18.6225	18.954	19.3665	19.06	1.73572	1.40312	2.48805	1.61164	2.0572	1.61725	0.75233	0.466849	0.321487	0.271482	-0.430843	0.288634
1281	PHF3	PHD finger protein 3	Q92576	Q92576	PHD;SPOC;TFIIS_M	15	15	15	10.9	10.9	10.9	229.48	0	87.03	119750000	98	53	16.1099	16.5201	16.1494	18.6619	18.6359	18.3744	16.3844	18.5553	17.4708	19.1953	19.2674	19.972	2.29762	3.57587	1.2104	0.723609	3.21846	2.87129	-1.08722	0.651629	0.920843	1.28739	2.00806	1.15642
1284	LARP4B	La-related protein 4B	Q92615	Q92615	La	14	14	14	18.6	18.6	18.6	80.551	0	55.014	429500000	32	83	16.1817	17.1703	16.5015	19.36	19.4909	19.6703	21.188	20.6151	20.5124	20.1412	19.8513	20.0922	2.8892	2.21637	4.15401	3.27339	3.41041	2.38299	1.26481	1.81924	0.521215	1.83027	-0.743596	1.26081
1291	DDX17	Probable ATP-dependent RNA helicase DDX17	Q92841	Q92841	DEAD;Helicase_C	22	15	15	32	21.8	21.8	80.272	0	155.89	685260000	37	130	15.1365	15.7969	16.7793	21.525	21.3636	21.2241	21.0096	20.6996	20.8187	21.8232	21.38	21.5238	5.46667	2.21021	4.93842	2.12362	5.67145	2.35006	-0.528245	1.86749	0.204782	0.566695	0.733028	1.88532
1292	UPF1	Regulator of nonsense transcripts 1	Q92900	Q92900	UPF1_Zn_bind	32	32	32	28.7	28.7	28.7	124.34	0	193.26	995290000	58	190	16.7343	15.7407	16.0882	21.2264	20.751	20.8742	15.6709	16.8051	16.9936	22.3349	22.1571	22.0828	4.76276	3.09155	0.302098	0.2324	6.00385	2.8657	-4.46066	2.35349	1.24109	2.35679	5.70175	2.37996
1296	ARHGEF2	Rho guanine nucleotide exchange factor 2	Q92974	Q92974	PH;RhoGEF	8	8	8	9.2	9.2	9.2	111.54	0	26.705	68164000	55	26	15.0875	17.027	16.7246	18.8286	18.5486	18.4481	18.7249	16.7321	17.7042	19.1552	19.3279	19.3496	2.32873	1.2491	1.44068	0.79877	2.99782	1.43306	-0.888054	0.584333	0.669092	1.87994	1.55715	0.950469
1297	USP9X	Probable ubiquitin carboxyl-terminal hydrolase FAF-X	Q93008	Q93008;O00507	UCH	40	40	40	16.5	16.5	16.5	292.28	0	225.47	1463300000	125	231	16.4924	16.8583	16.5245	21.4755	21.3401	21.6136	21.6996	21.4093	21.3039	21.6512	21.8845	21.525	4.85134	4.83741	4.8459	5.08176	5.06188	5.20875	-0.00543976	0.0125202	0.210542	0.720234	0.215982	0.610333
1298	USP7	Ubiquitin carboxyl-terminal hydrolase 7	Q93009	Q93009	MATH;UCH;USP7_C2;USP7_ICP0_bdg	9	9	9	8.6	8.6	8.6	128.3	0	23.758	163610000	64	38	16.6677	16.3595	15.9418	19.6458	19.6216	19.6462	17.0894	19.2158	19.1487	19.781	19.9219	19.4713	3.31486	2.40253	2.16165	1.09827	3.40174	3.34976	-1.15321	0.619341	0.0868772	0.235734	1.24008	0.668643
1301	ZNF622	Zinc finger protein 622	Q969S3	Q969S3	zf-C2H2_jaz	9	9	9	20.8	20.8	20.8	54.271	0	34.993	215820000	24	31	16.1124	16.2823	16.2356	19.2485	19.1631	17.4161	20.7499	20.1632	20.2111	18.9993	18.7053	18.73	2.39913	1.25372	4.16463	2.95842	2.60141	3.8854	1.7655	1.0625	0.202273	0.114417	-1.56322	2.26912
1303	MAGOHB	Protein mago nashi homolog 2	Q96A72	Q96A72	Mago_nashi	3	3	1	19.6	19.6	6.1	17.276	0	11.997	149080000	10	22	16.4622	15.6694	17.5057	20.6083	20.4656	20.3388	16.5324	19.3882	19.6704	15.483	20.2423	20.4041	3.9251	1.7894	1.98457	0.751343	2.16397	0.507094	-1.94053	0.717127	-1.76113	0.409893	0.179404	0.0314462
1307	EXOSC8	Exosome complex component RRP43	Q96B26	Q96B26	RNase_PH;RNase_PH_C	6	6	6	24.6	24.6	24.6	30.039	0	43.94	319900000	11	38	15.6813	16.6364	18.1689	20.9199	21.0615	21.048	15.9306	20.6081	20.4344	20.5417	20.5622	21.0441	4.18094	1.54756	2.16218	0.529047	3.88711	1.55197	-2.01876	0.497536	-0.293829	0.678044	1.72493	0.423837
1308	PINX1	PIN2/TERF1-interacting telomerase inhibitor 1	Q96BK5;A0A0A6YYK5	Q96BK5;A0A0A6YYK5	G-patch;HMG_box;Sox_C_TAD	2	2	2	9.1	9.1	9.1	37.034	0	13.32	55285000	12	17	16.5396	15.9383	16.1654	16.4988	19.1139	16.8219	18.0165	17.9604	18.4375	19.3872	19.1667	17.683	1.26372	0.58163	1.92366	2.90172	2.53117	1.49668	0.659943	0.293758	1.26744	0.55788	0.607502	0.425915
1309	PYCR2	Pyrroline-5-carboxylate reductase 2	Q96C36;J3KR12	Q96C36;J3KR12	F420_oxidored;P5CR_dimer	10	9	9	30.9	26.9	26.9	33.637	0	200.81	1785400000	16	149	15.8912	15.9665	15.1332	22.3643	22.2056	22.9434	21.9808	22.5495	22.6856	23.1284	22.8217	23.4869	6.8408	4.31074	6.74169	4.26919	7.48206	4.33437	-0.0991109	0.115715	0.641258	1.01209	0.740369	1.19827
1311	CCDC124	Coiled-coil domain-containing protein 124	Q96CT7	Q96CT7	DUF1014	7	7	7	31.8	31.8	31.8	25.835	0	61.306	381910000	12	47	16.3382	15.6656	16.6625	20.2364	21.0976	17.798	20.1975	22.0336	21.8123	20.4346	20.5904	20.0239	3.48856	1.21078	5.12569	2.35574	4.12754	3.05847	1.63713	0.61612	0.63898	0.232161	-0.998149	0.654913
1312	AP2M1	AP-2 complex subunit mu	Q96CW1	Q96CW1	Adap_comp_sub;Clat_adaptor_s	4	4	4	9	9	9	49.654	0	10.306	63447000	26	17	17.7594	17.7344	16.5393	18.1584	16.3868	16.7515	16.4755	18.5915	18.5145	18.6567	17.9438	18.1864	-0.245473	0.133457	0.516157	0.249837	0.917933	0.86634	0.76163	0.358939	1.16341	0.816385	0.401777	0.202767
1315	NMD3	60S ribosomal export protein NMD3	Q96D46	Q96D46	NMD3	5	5	5	10.7	10.7	10.7	57.603	0	11.734	63908000	26	16	16.557	17.3617	16.9632	18.2409	18.8212	18.3496	17.0613	18.96	18.8756	16.2857	18.2855	18.3835	1.50992	2.09748	1.33832	0.817902	0.690929	0.37367	-0.171601	0.0905587	-0.818995	0.451458	-0.647394	0.282502
1317	SNRNP40	U5 small nuclear ribonucleoprotein 40 kDa protein	Q96DI7	Q96DI7	WD40	7	7	7	20.7	20.7	20.7	39.31	0	62.022	307310000	16	54	15.9727	15.4541	16.5217	20.0434	19.5048	19.7292	20.821	20.123	20.2489	19.8646	19.7234	19.3877	3.77634	2.7613	4.41482	3.25552	3.67575	2.64722	0.638481	1.09619	-0.10059	0.181626	-0.739071	1.26881
1330	LTV1	Protein LTV1 homolog	Q96GA3	Q96GA3;A0A075B6Q4	LTV	8	8	8	16.4	16.4	16.4	54.854	0	38.477	156580000	19	21	17.4026	15.8837	16.1413	19.8927	20.1373	20.1972	20.361	19.884	19.3086	19.7752	20.0502	16.2697	3.5999	1.85778	3.37532	2.21098	2.22249	0.695746	-0.224573	0.265003	-1.3774	0.425867	-1.15283	0.350953
1332	TOE1	Target of EGR1 protein 1	Q96GM8	Q96GM8	CAF1;zf-CCCH	5	5	5	14.9	14.9	14.9	56.547	0	24.519	67341000	21	25	15.2471	16.4877	17.0229	18.7126	18.2975	15.7986	18.9135	18.6379	18.6288	18.6362	18.3366	18.9284	1.35033	0.546724	2.47416	1.4117	2.38117	1.45295	1.12383	0.465928	1.03084	0.426064	-0.0929877	0.177406
1333	DDX27	Probable ATP-dependent RNA helicase DDX27	Q96GQ7	Q96GQ7	DEAD;Helicase_C	10	10	10	13.8	13.8	13.8	89.834	0	31.576	52024000	38	32	17.0879	16.3117	16.6698	17.895	17.9026	17.6828	17.5052	17.6784	17.8451	17.1688	17.3288	17.1699	1.13702	1.55939	0.986444	1.48741	0.53269	0.87208	-0.150577	0.538673	-0.604331	2.47259	-0.453754	1.59336
1336	PGAM5	Serine/threonine-protein phosphatase PGAM5, mitochondrial	Q96HS1	Q96HS1	His_Phos_1	5	5	5	17.3	17.3	17.3	32.004	0	15.295	170180000	20	22	16.0279	16.6722	17.5523	16.8412	19.8444	16.7993	15.5825	19.4992	19.6298	20.5531	20.386	19.5289	1.07752	0.391564	1.48639	0.418003	3.40522	2.3403	0.408874	0.0866317	2.3277	0.862082	1.91883	0.548035
1338	RBM17	Splicing factor 45	Q96I25	Q96I25	G-patch	8	8	8	20.7	20.7	20.7	44.961	0	22.229	37619000	23	26	16.5309	16.9258	15.6802	17.6887	18.0038	18.0575	16.1063	15.4024	15.5301	17.9377	18.0911	17.6793	1.5377	1.37217	0	NaN	1.52372	1.3707	-2.23705	2.58197	-0.013979	0.0282264	2.22307	2.60612
1341	THOC3	THO complex subunit 3	Q96J01	Q96J01	PD40;WD40	6	6	6	13.7	13.7	13.7	38.771	0	15.108	64921000	16	22	16.9579	16.831	15.908	18.8808	18.6064	16.1754	16.7114	18.5045	18.2281	17.5499	17.9022	17.7956	1.32188	0.583994	1.24904	0.846499	1.18362	1.22955	-0.0728461	0.023527	-0.138267	0.0518584	-0.0654208	0.037122
1344	ZFR	Zinc finger RNA-binding protein	Q96KR1	Q96KR1	DZF	23	23	23	24.8	24.8	24.8	117.01	0	233.9	668930000	46	150	16.8197	17.0502	16.4044	20.0268	19.9706	20.2421	20.9313	20.8682	20.5054	20.2737	20.2667	19.7643	3.32171	3.06801	4.0102	3.86474	3.34344	3.68726	0.688495	1.76457	0.0217355	0.0383851	-0.666759	1.41241
1346	IFT74	Intraflagellar transport protein 74 homolog	Q96LB3	Q96LB3		6	6	6	11.5	11.5	11.5	69.239	0	18.252	85431000	40	24	15.7668	17.0845	17.4905	18.197	18.1375	18.4027	19.4416	18.7999	18.1119	19.0429	19.2705	18.8827	1.46514	0.986887	2.00385	1.3919	2.28478	1.36884	0.53871	0.531561	0.819639	2.25711	0.28093	0.262913
1347	RNPC3	RNA-binding protein 40	Q96LT9	Q96LT9	RRM_1	5	5	5	10.3	10.3	10.3	58.574	0	12.042	56933000	24	21	16.4151	15.7383	16.0608	19.1172	18.2733	18.8394	16.5111	15.495	17.6595	18.3438	18.7186	18.7698	2.6719	2.86858	0.483773	0.278992	2.53929	3.09794	-2.18813	1.24014	-0.132613	0.174051	2.05552	1.12269
1351	WDR92	WD repeat-containing protein 92	Q96MX6	Q96MX6	WD40	5	5	5	13.7	13.7	13.7	39.74	0	16.125	64742000	19	21	15.7771	15.4299	15.23	18.8922	19.2476	18.8197	16.3374	18.2751	16.4891	19.2201	19.42	19.1988	3.50747	4.04036	1.55488	0.913884	3.80064	3.43287	-1.95259	1.08428	0.293168	0.842322	2.24576	1.17306
1352	DOCK7	Dedicator of cytokinesis protein 7	Q96N67	Q96N67;Q96HP0	Ded_cyto;DOCK-C2;DUF3398	10	10	10	5.4	5.4	5.4	242.56	0	29.02	46959000	109	15	15.569	16.3131	17.0869	17.3808	16.1275	14.8272	16.7862	17.8157	18.1724	17.6456	17.953	17.3152	-0.211169	0.0860715	1.26843	0.983736	1.31494	1.10209	1.4796	0.758946	1.52611	0.774505	0.0465151	0.0336333
1355	RBM14	RNA-binding protein 14	Q96PK6	Q96PK6;A0A0A0MSL8	RRM_1	13	13	13	19.6	19.6	19.6	69.491	0	43.911	4699700000	23	67	15.382	17.7245	17.1714	25.9292	26.0029	24.8944	15.6297	24.9526	23.6769	26.3286	26.1196	26.5381	8.84956	2.78761	4.66043	0.605564	9.56948	2.35191	-4.18914	0.542322	0.719913	0.761923	4.90905	0.63001
1358	SMG1	Serine/threonine-protein kinase SMG1	Q96Q15	Q96Q15	FATC;PI3_PI4_kinase	11	11	11	3.6	3.6	3.6	410.5	0	38.301	50933000	178	21	17.2261	17.1853	16.9324	15.3503	15.6474	16.0318	17.5941	15.9269	16.0485	18.6252	18.6868	18.0638	0	NaN	0	NaN	1.34402	1.9865	0	NaN	2.78208	3.24145	1.93543	1.25839
1365	MCCC1	Methylcrotonoyl-CoA carboxylase subunit alpha, mitochondrial	Q96RQ3	Q96RQ3	Biotin_carb_C;Biotin_lipoyl;CPSase_L_chain;CPSase_L_D2	9	9	9	15.9	15.9	15.9	80.472	0	94.156	299490000	33	83	21.5323	24.2823	22.4817	20.6482	20.4843	20.6956	16.5677	20.3302	20.1544	20.6765	20.4117	20.9958	-2.15604	0.938742	-3.74795	1.13871	-2.07071	0.926273	-1.59191	0.490047	0.0853284	0.171457	1.67724	0.517234
1368	WDR24	WD repeat-containing protein 24	Q96S15	Q96S15	WD40	5	5	5	6.1	6.1	6.1	101.99	0	12.254	39512000	44	19	16.0886	16.2941	14.46	17.206	17.214	16.9093	16.2721	17.855	17.2267	18.2137	19.0808	18.6287	1.49554	0.923292	1.50366	0.936435	3.02679	1.66637	0.00812213	0.00538188	1.53125	1.81272	1.52313	1.22218
1369	SRPK1	SRSF protein kinase 1	Q96SB4	Q96SB4	Pkinase	13	13	11	22.4	22.4	19.8	74.324	0	140.44	969800000	28	249	15.3504	16.4991	17.0323	20.6393	20.6002	20.1576	20.8843	20.4021	20.2758	21.4446	21.2735	21.3219	4.17174	2.05227	4.2268	2.14024	5.0527	2.04794	0.0550569	0.0803619	0.880955	1.68135	0.825898	1.41
1370	SMC6	Structural maintenance of chromosomes protein 6	Q96SB8	Q96SB8	SMC_N	6	6	6	7.2	7.2	7.2	126.32	0	18.906	44043000	63	14	16.4607	16.4151	16.5218	17.1548	18.0401	15.824	17.3646	17.6254	17.7334	18.7816	18.2319	18.2283	0.540457	0.310007	1.10861	2.20382	1.94808	2.12705	0.568153	0.326239	1.40762	0.817278	0.839472	1.5969
1371	STRBP	Spermatid perinuclear RNA-binding protein	Q96SI9	Q96SI9	dsrm;DZF	14	10	10	21.3	16.2	16.2	73.652	0	32.615	186130000	40	39	16.7632	16.816	18.3236	19.9711	19.9257	21.495	19.0984	21.564	20.6621	20.7242	21.0983	20.2726	3.163	1.91664	3.14056	1.55125	3.39746	1.96568	-0.0224393	0.00827641	0.234461	0.149199	0.256901	0.118062
1374	RBM15	Putative RNA-binding protein 15	Q96T37	Q96T37	RRM_1;SPOC	16	16	15	20.6	20.6	19.9	107.19	0	92.174	305210000	54	39	17.3276	17.2604	16.5292	20.0722	19.6774	19.0883	20.2447	20.5655	20.625	20.3683	20.4973	20.4017	2.57355	2.57146	3.43933	2.79742	3.38333	2.31325	0.865777	1.10892	0.809778	0.988237	-0.0559991	0.161509
1378	CDC5L	Cell division cycle 5-like protein	Q99459	Q99459	Myb_Cef	19	19	19	27.9	27.9	27.9	92.25	0	145.52	881930000	38	182	16.5429	16.3921	17.5484	20.5694	20.6062	20.4894	20.4642	20.3316	20.6027	20.3216	20.5222	20.1474	3.72723	2.05178	3.63837	2.11961	3.50261	2.17564	-0.0888634	0.418561	-0.224621	0.782608	-0.135757	0.429173
1382	PARK7	Protein deglycase DJ-1	Q99497	Q99497	DJ-1_PfpI	8	8	8	39.2	39.2	39.2	19.891	0	28.844	155390000	12	45	17.157	15.6594	17.2963	17.156	16.4719	15.8993	19.6163	18.9647	19.6735	19.0697	18.7487	19.4079	0	NaN	2.7139	1.6601	2.37122	1.47494	2.90906	2.34469	2.56638	2.09337	-0.342681	0.503146
1384	POP1	Ribonucleases P/MRP protein subunit POP1	Q99575	Q99575	POP1;POPLD	13	13	13	16.7	16.7	16.7	114.71	0	77.615	195860000	53	62	15.1478	15.3677	17.1366	19.7885	19.1106	17.0893	18.6144	20.0356	19.5047	19.5905	19.0071	18.9291	2.77875	1.24228	3.50086	1.86536	3.29151	1.59696	0.72212	0.313309	0.512769	0.224686	-0.209351	0.165548
1386	EIF3C;EIF3CL	Eukaryotic translation initiation factor 3 subunit C;Eukaryotic translation initiation factor 3 subunit C-like protein	Q99613;B5ME19	Q99613;B5ME19	eIF-3c_N;PCI	25	25	25	26.5	26.5	26.5	105.34	0	323.31	5302200000	42	392	15.3548	16.1778	15.6859	23.1164	22.8552	22.2473	23.4945	23.5811	23.6981	23.0558	22.4133	22.9703	7.00013	4.40844	7.85171	3.29985	7.07364	4.54612	0.851576	1.1319	0.073506	0.0789821	-0.77807	1.28933
1388	ATXN2	Ataxin-2	Q99700	Q99700	LsmAD;PAM2;SM-ATX	11	11	11	10.1	10.1	10.1	140.28	0	45.814	145070000	46	54	16.1776	17.0233	17.1529	19.4537	19.3876	19.4048	19.3982	19.7919	18.7763	19.1435	18.9222	18.9216	2.63075	1.88728	2.53752	2.40028	2.21116	1.83753	-0.0932248	0.106464	-0.419583	1.63141	-0.326358	0.41396
1390	HNRNPAB	Heterogeneous nuclear ribonucleoprotein A/B	Q99729	Q99729	CBFNT;RRM_1	2	2	2	7.5	7.5	7.5	36.224	0	53.827	192020000	13	19	15.4711	16.2529	17.2015	21.3716	21.0609	21.008	16.9214	17.9517	16.7376	22.2656	22.4969	21.1573	4.83833	2.09686	0.895074	0.635197	5.66475	2.95482	-3.94325	2.2564	0.826423	0.752377	4.76968	2.96639
1392	PIP5K1A	Phosphatidylinositol 4-phosphate 5-kinase type-1 alpha	Q99755	Q99755;O60331	PIP5K	5	5	1	10.1	10.1	1.8	62.633	0	15.664	49871000	24	13	18.413	16.0294	18.3077	17.1974	16.6951	16.0696	15.9965	18.3612	18.1036	17.3986	17.8618	17.7676	0	NaN	-0.0962515	0.0300008	0.0926272	0.0377178	0.833088	0.409496	1.02197	1.14542	0.188879	0.0830005
1393	CCT7	T-complex protein 1 subunit eta	Q99832	Q99832	Cpn60_TCP1	14	14	14	28.2	28.2	28.2	59.366	0	78.131	692630000	31	132	16.1313	17.0471	15.203	20.8513	20.7389	20.6133	19.8898	20.5223	21.1373	21.2508	20.9281	21.6474	4.60738	1.91969	4.38934	2.41978	5.14833	2.30093	-0.218039	0.215553	0.54095	0.9588	0.758989	0.796656
1394	EBNA1BP2	Probable rRNA-processing protein EBP2	Q99848	Q99848	Ebp2	5	5	5	19	19	19	34.852	0	15.821	187240000	15	27	17.3966	16.1878	15.8653	19.9734	19.65	17.2895	21.0722	20.4799	20.1705	19.2207	19.6805	18.8633	2.48772	1.10179	4.09098	2.41461	2.77161	1.87057	1.60326	0.718409	0.283893	0.111549	-1.31937	1.67848
1395	PRMT1	Protein arginine N-methyltransferase 1	Q99873	Q99873;Q9NR22	Methyltransf_31	10	10	10	24.3	24.3	24.3	42.461	0	41.024	225650000	21	37	16.7538	16.7795	16.8259	20.1217	19.7449	20.1212	19.3937	19.7056	19.155	18.8894	18.4764	19.4244	3.20954	2.92987	2.63172	2.49546	2.14366	1.8081	-0.577819	1.3053	-1.06588	1.36668	-0.488066	0.665972
1398	DDX50	ATP-dependent RNA helicase DDX50	Q9BQ39	Q9BQ39	DEAD;GUCT;Helicase_C	7	5	5	10.6	6.9	6.9	82.564	0	17.029	92672000	39	14	16.5818	15.8909	16.7354	20.5346	20.3644	18.184	18.6719	19.575	19.9606	19.4507	17.4344	15.1684	3.29164	1.4249	2.99976	2.35217	0.948437	0.279256	-0.291875	0.122844	-2.3432	0.707961	-2.05132	0.630598
1399	GRWD1	Glutamate-rich WD repeat-containing protein 1	Q9BQ67	Q9BQ67	CAF1C_H4-bd;WD40	5	5	5	13.9	13.9	13.9	49.419	0	14.964	75491000	21	17	16.4104	17.4824	16.6209	18.9628	18.7967	15.7121	14.838	18.8167	19.4767	18.6236	18.7078	19.3503	0.985977	0.34323	0.872598	0.213599	2.05602	2.0391	-0.113379	0.0209564	1.07004	0.377769	1.18342	0.30019
1400	TCF25	Transcription factor 25	Q9BQ70	Q9BQ70	Tcf25	4	4	4	9.2	9.2	9.2	76.666	0	25.625	45761000	29	11	16.491	16.6036	16.4259	18.2307	18.435	16.955	17.1842	18.7399	16.1312	18.6734	18.5414	18.3988	1.36672	1.01601	0.844881	0.419269	2.031	4.06563	-0.52184	0.225875	0.664274	0.542871	1.18611	0.589734
1401	WDR77	Methylosome protein 50	Q9BQA1	Q9BQA1	WD40	5	5	5	17.8	17.8	17.8	36.724	0	35.867	308800000	11	42	15.1194	16.3037	16.0271	20.6659	20.3853	20.5168	20.4028	20.6057	20.4653	19.6945	19.5463	20.1688	4.70594	2.38737	4.67453	2.31679	3.98648	2.66968	-0.0314039	0.11224	-0.719456	1.3428	-0.688052	1.25323
1402	MYBBP1A	Myb-binding protein 1A	Q9BQG0	Q9BQG0	DNA_pol_phi	12	12	12	11.9	11.9	11.9	148.85	0	38.476	95396000	69	33	16.8425	15.9471	17.2115	19.3934	19.0282	16.9068	18.7247	18.5146	17.8586	18.2873	17.8532	17.7026	1.77572	0.870385	1.69893	1.59958	1.28066	1.23731	-0.0767879	0.0304249	-0.495058	0.227896	-0.41827	0.57963
1403	C7orf50	Uncharacterized protein C7orf50	Q9BRJ6	Q9BRJ6	DUF2373	7	7	7	45.9	45.9	45.9	22.083	0	126.46	625620000	9	138	15.386	15.1562	15.0742	21.168	21.2361	21.2337	20.9276	20.8613	20.4966	21.0319	20.8018	20.7565	6.00717	3.9342	5.55637	4.88961	5.65793	5.78843	-0.450797	1.12859	-0.349232	1.32768	0.101565	0.249392
1408	PELO	Protein pelota homolog	Q9BRX2	Q9BRX2	eRF1_1;eRF1_2;eRF1_3	5	5	5	14.3	14.3	14.3	43.359	0	33.894	140300000	21	17	14.9221	16.3027	17.4294	17.7116	17.0644	14.6208	20.7855	19.9312	20.1668	15.7525	17.7782	16.5785	0.247494	0.0727418	4.0764	1.68412	0.484956	0.19932	3.8289	1.32607	0.237462	0.0742124	-3.59144	1.84022
1415	HNRNPUL1	Heterogeneous nuclear ribonucleoprotein U-like protein 1	Q9BUJ2	Q9BUJ2	SAP;SPRY	12	12	12	14.6	14.6	14.6	95.737	0	61.834	540480000	35	69	16.7529	16.6849	15.9538	20.8844	20.7159	20.8082	20.7793	20.4846	20.8716	21.0943	21.029	21.0528	4.33897	2.58068	4.24799	3.03962	4.59483	2.52989	-0.0909863	0.276126	0.25586	1.64445	0.346846	1.02999
1417	DDX23	Probable ATP-dependent RNA helicase DDX23	Q9BUQ8	Q9BUQ8	DEAD;Helicase_C	21	21	21	27.9	27.9	27.9	95.581	0	99.306	620220000	44	135	16.7008	16.7936	16.6271	19.873	20.017	18.0534	21.1794	21.0124	21.0288	20.8436	20.6526	20.241	2.60728	1.27363	4.36641	6.31029	3.87191	2.9446	1.75912	0.968874	1.26463	0.753762	-0.494497	1.00724
1419	WDR18	WD repeat-containing protein 18	Q9BV38	Q9BV38	WD40;WD40_alt	5	5	5	12.3	12.3	12.3	47.405	0	19.39	273340000	19	27	17.0114	17.1771	16.9592	20.1407	19.7878	20.3402	21.012	20.2605	19.9012	20.3872	19.9931	20.0811	3.04028	3.07773	3.34198	2.12226	3.10455	3.83641	0.301697	0.327402	0.0642656	0.115586	-0.237432	0.257464
1424	GNL3	Guanine nucleotide-binding protein-like 3	Q9BVP2	Q9BVP2	GN3L_Grn1;MMR_HSR1	16	16	16	23.9	23.9	23.9	61.992	0	90.281	674660000	26	154	15.0425	18.1136	16.3419	20.6706	20.5611	20.3841	21.1418	20.76	20.9551	20.4165	20.1912	20.1696	4.03928	1.35467	4.45302	1.44409	3.75981	1.29494	0.413745	1.35616	-0.27947	1.14287	-0.693215	2.04663
1429	REPIN1	Replication initiator 1	Q9BWE0	Q9BWE0	zf-C2H2	1	1	1	2.8	2.8	2.8	63.574	0	11.736	10126000	30	9	15.3462	16.3729	16.2563	14.4228	17.2509	15.6943	15.4117	16.9995	15.3939	17.3309	17.7566	17.288	0	NaN	-0.05675	0.0302539	1.4667	1.52879	0.145678	0.0507771	1.66913	0.758447	1.52345	1.02661
1431	RBM4;RBM4B	RNA-binding protein 4;RNA-binding protein 4B	Q9BWF3;Q9BQ04	Q9BWF3;Q9BQ04	RRM_1;zf-CCHC	9	9	9	31.3	31.3	31.3	40.313	0	42.915	384590000	18	53	14.9267	16.375	16.8322	20.9708	21.2545	20.977	15.7277	19.0926	18.8909	21.482	21.1641	20.8924	5.02282	1.95024	1.85914	0.643204	5.13488	2.09722	-3.16368	1.00045	0.112061	0.219373	3.27574	1.03752
1432	SF3B5	Splicing factor 3B subunit 5	Q9BWJ5	Q9BWJ5	SF3b10	1	1	1	17.4	17.4	17.4	10.135	0	11.293	79316000	5	24	15.1092	17.2266	15.9679	18.2506	18.534	17.4193	19.7737	19.0164	18.2351	18.5092	19.3586	18.7302	1.96675	1.18652	2.90716	1.65568	2.76473	1.4977	0.940407	0.765827	0.797976	0.868117	-0.142431	0.0980448
1437	SRRT	Serrate RNA effector molecule homolog	Q9BXP5	Q9BXP5	ARS2;DUF3546	21	21	21	19.3	19.3	19.3	100.67	0	129.63	795050000	44	107	16.5318	16.1089	16.0564	20.496	20.6414	20.324	20.6508	20.6098	20.5305	20.3953	20.3722	20.2227	4.25477	4.10621	4.36468	3.15553	4.09771	3.37409	0.109915	0.447715	-0.15706	0.637973	-0.266975	1.70746
1439	NUSAP1	Nucleolar and spindle-associated protein 1	Q9BXS6	Q9BXS6		5	5	5	15.6	15.6	15.6	49.451	0	36.55	96526000	24	25	16.2163	16.0036	15.7704	18.5532	18.9855	17.8024	19.2727	19.1154	18.1028	18.2704	19.1981	17.4919	2.45025	1.94341	2.83353	2.01138	2.32339	1.45387	0.383287	0.310414	-0.126861	0.0733571	-0.510148	0.340371
1440	SCAPER	S phase cyclin A-associated protein in the endoplasmic reticulum	Q9BY12	Q9BY12		9	9	9	9.4	9.4	9.4	158.29	0	43.489	63311000	65	30	14.924	15.9301	15.592	18.2289	18.022	15.6437	16.2399	18.2176	18.309	18.1861	17.8616	18.2801	1.81624	0.826398	2.10683	1.14309	2.62727	2.25838	0.290585	0.0970209	0.811022	0.364727	0.520437	0.28139
1444	NIFK	MKI67 FHA domain-interacting nucleolar phosphoprotein	Q9BYG3	Q9BYG3	hNIFK_binding;RRM_1	9	9	9	35.2	35.2	35.2	34.222	0	55.15	100460000	15	36	16.4268	17.1239	17.4475	18.6993	18.7631	20.0856	19.9978	19.134	19.2985	17.9526	20.0564	18.3308	2.18328	1.68227	2.47737	2.43421	1.78055	1.02963	0.294087	0.213905	-0.402736	0.19391	-0.696823	0.396575
1449	GTPBP4	Nucleolar GTP-binding protein 1	Q9BZE4	Q9BZE4	NOG1;NOGCT	14	14	14	21.5	21.5	21.5	73.964	0	65.628	475350000	33	104	15.9269	16.7469	16.1894	19.7582	19.5844	20.1179	21.3892	21.2052	21.1526	19.4887	19.766	19.4386	3.53246	3.22738	4.96126	2.93477	3.27667	2.73055	1.4288	2.32182	-0.255793	0.594196	-1.68459	3.48388
1450	UPF3B	Regulator of nonsense transcripts 3B	Q9BZI7	Q9BZI7	Smg4_UPF3	8	8	8	18.4	18.4	18.4	57.761	0	41.29	175490000	18	40	16.837	16.8879	16.1285	18.906	19.3434	16.4157	16.8631	18.3109	17.835	20.732	20.7387	20.2994	1.60391	0.666474	1.05189	0.934129	3.97223	3.28497	-0.552015	0.205097	2.36833	0.926924	2.92034	1.87662
1451	CRNKL1	Crooked neck-like protein 1	Q9BZJ0	Q9BZJ0	HAT	6	6	6	7.8	7.8	7.8	100.45	0	15.207	42321000	50	12	15.6215	15.659	16.7605	17.8261	15.4911	16.2183	18.2919	18.879	18.8276	16.1403	17.0496	15.2542	0	NaN	2.65251	2.07915	0	NaN	2.15436	1.09667	0	NaN	-2.51817	1.54489
1454	UNK	RING finger protein unkempt homolog	Q9C0B0	Q9C0B0	zf-CCCH	3	3	3	3.6	3.6	3.6	88.084	0	14.256	49325000	34	15	15.491	16.5905	16.9631	18.7934	18.9066	18.7297	16.8122	16.1066	15.2769	19.1857	19.0936	18.7611	2.4617	1.53278	0	NaN	2.66528	1.70616	-2.74467	1.622	0.20358	0.599894	2.94825	1.79888
1459	DDX24	ATP-dependent RNA helicase DDX24	Q9GZR7	Q9GZR7	DEAD;Helicase_C	14	14	14	16.8	16.8	16.8	96.331	0	69.815	151000000	43	60	15.1965	16.2138	15.2182	18.8288	19.3171	19.2662	19.5717	19.7442	18.6209	19.028	19.4775	18.9726	3.59457	2.52395	3.76944	2.82992	3.61653	2.55381	0.174871	0.166971	0.0219612	0.0333046	-0.15291	0.143315
1460	POLR1E	DNA-directed RNA polymerase I subunit RPA49	Q9GZS1	Q9GZS1	RNA_pol_I_A49	7	7	7	15.2	15.2	15.2	53.961	0	18.7	111250000	21	27	15.1905	15.9438	15.2549	19.2507	19.6008	19.7553	16.8961	14.454	18.5634	19.9403	19.7727	18.8152	4.07252	3.38958	1.17475	0.366814	4.04634	2.92209	-2.89777	0.873675	-0.026179	0.0222889	2.87159	0.89086
1461	WDR61	WD repeat-containing protein 61;WD repeat-containing protein 61, N-terminally processed	Q9GZS3	Q9GZS3	WD40	9	9	9	24.9	24.9	24.9	33.58	0	39.402	374450000	15	49	15.8841	16.7501	17.5242	20.0242	20.2596	20.7643	21.5727	21.036	21.2946	19.6927	19.2146	19.7332	3.62985	2.12619	4.58161	2.21435	2.82735	1.74493	0.951757	1.55113	-0.802508	1.32939	-1.75426	2.80857
1462	SLIRP	SRA stem-loop-interacting RNA-binding protein, mitochondrial	Q9GZT3	Q9GZT3	RRM_1	5	5	5	49.5	49.5	49.5	12.349	0	21.531	330370000	8	44	15.8082	17.9417	17.1643	20.9724	20.6611	16.3936	21.0472	19.8095	20.3223	21.6518	21.3676	20.915	2.37099	0.609637	3.42165	1.81615	4.34008	1.89567	1.05066	0.256295	1.9691	0.503968	0.918432	0.965444
1466	LSG1	Large subunit GTPase 1 homolog	Q9H089	Q9H089	MMR_HSR1	9	9	9	13.2	13.2	13.2	75.225	0	21.959	80291000	37	17	15.6378	18.2373	16.1718	19.1863	19.1115	19.2457	17.9224	19.2705	19.4169	19.3015	15.4911	19.3083	2.49888	1.05927	2.18763	1.03852	1.35133	0.369432	-0.311246	0.236236	-1.14755	0.335372	-0.836305	0.230341
1467	NAT10	N-acetyltransferase 10	Q9H0A0	Q9H0A0	DUF1726;GNAT_acetyltr_2;Helicase_RecD;tRNA_bind_2	10	10	10	10.5	10.5	10.5	115.73	0	33.944	124160000	53	30	17.1628	15.423	16.9075	20.0356	19.6856	19.631	16.518	18.3664	19.3326	18.9474	20.0563	19.2134	3.28631	1.66731	1.57457	0.705004	2.90789	1.80395	-1.71174	0.76643	-0.378416	0.421113	1.33333	0.613939
1470	DDX47	Probable ATP-dependent RNA helicase DDX47	Q9H0S4	Q9H0S4	DEAD;Helicase_C	7	7	7	15.8	15.8	15.8	50.646	0	50.512	117180000	20	42	16.7733	15.5572	16.9998	19.1069	18.8527	16.9869	19.0696	18.3292	18.7588	18.8167	19.0881	18.5678	1.87204	1.04562	2.27574	1.66879	2.38076	1.61587	0.403707	0.211513	0.508722	0.276676	0.105015	0.14794
1471	CCDC8	Coiled-coil domain-containing protein 8	Q9H0W5	Q9H0W5	PNMA	8	8	8	25.1	25.1	25.1	59.374	0	31.528	98319000	33	34	16.0699	15.6199	16.4006	18.9258	18.6734	18.8206	18.9367	18.3743	17.7674	18.5622	18.5635	19.1878	2.77646	2.45511	2.32933	2.16375	2.74106	3.04403	-0.447124	0.50125	-0.0353978	0.053181	0.411726	0.433267
1476	ASCC2	Activating signal cointegrator 1 complex subunit 2	Q9H1I8	Q9H1I8	CUE	6	6	6	7.8	7.8	7.8	86.359	0	21.063	188220000	25	37	16.4061	16.8639	16.0015	20.1407	20.2036	20.2043	20.5164	20.5963	20.1871	19.9679	19.6422	20.5012	3.75902	2.38271	4.00945	3.09879	3.61324	3.28853	0.250427	0.743555	-0.14578	0.20782	-0.396207	0.595851
1478	DHX36	ATP-dependent RNA helicase DHX36	Q9H2U1	Q9H2U1	DEAD;HA2;Helicase_C;OB_NTP_bind	14	13	13	15.6	14.7	14.7	114.76	0	78.515	313840000	48	62	17.4359	17.1057	16.4036	21.0637	20.9692	20.7685	17.526	18.7917	18.7117	21.1576	21.3177	20.5787	3.95203	2.45536	1.36137	1.21677	4.03625	3.17324	-2.59066	1.69319	0.0842183	0.123239	2.67488	2.01745
1480	MRPL46	39S ribosomal protein L46, mitochondrial	Q9H2W6	Q9H2W6	MRP-L46	4	4	4	15.4	15.4	15.4	31.705	0	15.849	36081000	17	25	15.5695	17.1215	16.3109	18.0105	17.3635	17.0729	17.5946	17.9736	18.1803	16.4798	17.4752	18.3743	1.14832	0.964985	1.58218	1.24321	1.10912	0.710802	0.433862	0.573876	-0.039196	0.0208576	-0.473058	0.315533
1481	PNN	Pinin	Q9H307	Q9H307	Pinin_SDK_memA;Pinin_SDK_N	4	4	4	5.4	5.4	5.4	81.627	0	12.926	25315000	34	9	15.8356	16.2269	17.1515	16.949	17.2907	17.4667	16.1024	18.3968	17.3661	18.2853	18.5014	17.0841	0.830801	0.807761	0.883773	0.483295	1.5523	1.23175	0.0529715	0.0248204	0.721497	0.622855	0.668526	0.341865
1487	ZNF768	Zinc finger protein 768	Q9H5H4	Q9H5H4	RNA_pol_Rpb1_R;zf-C2H2	8	8	8	17.6	17.6	17.6	60.228	0	25.458	134480000	25	35	16.0959	17.4053	16.6341	18.7675	19.1188	16.6587	19.4666	19.1818	19.6093	19.7577	19.4544	19.2289	1.46989	0.727635	2.70746	1.90575	2.76857	2.00539	1.23757	0.608022	1.29867	0.638264	0.0611089	0.111411
1489	YTHDC2	Probable ATP-dependent RNA helicase YTHDC2	Q9H6S0	Q9H6S0	Ank_2;DEAD;HA2;Helicase_C;OB_NTP_bind;R3H;YTH	28	28	28	23.1	23.1	23.1	160.25	0	180.27	688270000	75	194	16.6844	15.8628	16.4102	20.6552	20.5783	20.2337	20.1673	20.1206	20.163	20.4192	20.5785	20.2041	4.16995	3.26004	3.83119	2.41571	4.08145	3.04557	-0.338766	0.925938	-0.0885003	0.20137	0.250266	0.838588
1493	TDRD3	Tudor domain-containing protein 3	Q9H7E2	Q9H7E2	TUDOR;UBA	9	9	9	19.2	19.2	19.2	73.184	0	34.954	123380000	38	33	17.3366	16.3186	14.9728	18.1939	18.375	16.6825	19.1902	18.7634	18.6382	18.321	18.0835	18.0822	1.54116	0.809154	2.65459	1.27228	1.9529	0.990805	1.11342	0.782203	0.411736	0.280547	-0.701689	1.45652
1494	C8orf33	UPF0488 protein C8orf33	Q9H7E9	Q9H7E9	DUF4615	2	2	2	10.9	10.9	10.9	24.992	0	33.551	55103000	10	15	16.3201	14.6913	17.4026	15.0519	15.8178	18.5758	16.0741	17.1017	16.9228	19.3524	18.9578	18.5664	0.343792	0.091679	0	NaN	2.82084	1.2196	0.21771	0.0650263	2.47705	0.849805	2.25934	2.22591
1506	ELP3	Elongator complex protein 3	Q9H9T3	Q9H9T3	Acetyltransf_1;Radical_SAM	4	4	4	7.1	7.1	7.1	62.258	0	9.3101	58752000	31	9	16.6846	15.9008	16.5608	15.6403	18.2704	15.1135	17.5079	18.7027	16.7252	19.8969	19.108	19.4793	-0.0407012	0.0127596	1.26318	0.834051	3.11266	3.12659	1.30388	0.484536	3.15336	1.11337	1.84948	1.16026
1507	POLR1B	DNA-directed RNA polymerase I subunit RPA2	Q9H9Y6	Q9H9Y6	RNA_pol_Rpa2_4;RNA_pol_Rpb2_1;RNA_pol_Rpb2_2;RNA_pol_Rpb2_3;RNA_pol_Rpb2_5;RNA_pol_Rpb2_6;RNA_pol_Rpb2_7	12	12	12	10.5	10.5	10.5	128.23	0	36.389	169730000	57	56	15.9011	15.4322	16.1624	19.9083	19.8798	19.3901	16.9911	18.7619	18.7544	19.8154	19.9658	19.756	3.89415	3.71403	2.33719	1.34639	4.0138	2.83735	-1.55696	0.963175	0.119656	0.251548	1.67661	0.987855
1513	RNMTL1	rRNA methyltransferase 3, mitochondrial	Q9HC36	Q9HC36	SpoU_methylase;SpoU_sub_bind	6	6	6	13.8	13.8	13.8	47.019	0	25.585	194500000	17	25	16.1577	16.138	17.5243	19.382	20.1144	16.3255	15.6606	20.5775	20.7655	20.0159	19.5146	18.8821	2.00065	0.656758	2.39453	0.543699	2.86423	2.03579	0.393875	0.0670137	0.86358	0.268278	0.469705	0.0931626
1515	MCCC2	Methylcrotonoyl-CoA carboxylase beta chain, mitochondrial	Q9HCC0	Q9HCC0	Carboxyl_trans	15	15	15	28.4	28.4	28.4	61.332	0	74.663	459190000	28	132	21.6722	24.5124	22.2599	21.5401	21.3679	21.2147	21.8346	21.4961	21.6641	21.4005	21.2873	21.3759	-1.44064	0.625302	-1.14991	0.501879	-1.46031	0.631719	0.290734	1.00565	-0.019666	0.0660383	-0.3104	1.1355
1517	MOV10	Putative helicase MOV-10	Q9HCE1	Q9HCE1		27	27	27	28	28	28	113.67	0	238.35	1501300000	55	233	17.4462	16.6264	16.681	21.9477	21.7356	21.6592	22.5284	22.3429	22.0965	21.7772	21.6864	21.1921	4.86298	2.87948	5.40477	3.32912	4.63403	3.54878	0.541782	1.54365	-0.228952	0.466586	-0.770734	1.5169
1522	WDR6	WD repeat-containing protein 6	Q9NNW5	Q9NNW5	WD40	3	3	3	2.2	2.2	2.2	121.72	0	5.2183	37566000	49	9	17.793	16.1733	16.224	18.525	16.1433	16.8229	16.8691	18.2909	17.9728	18.3507	18.2432	18.0889	0.433656	0.185808	0.980817	0.642111	1.4975	0.985174	0.54716	0.25772	1.06384	0.566625	0.516681	0.452339
1524	EXOSC4	Exosome complex component RRP41	Q9NPD3	Q9NPD3	RNase_PH;RNase_PH_C	7	7	7	31	31	31	26.383	0	38.46	538350000	10	40	16.264	16.739	15.2235	21.741	21.5107	22.0096	21.0417	20.5133	20.5423	21.7854	21.75	21.5615	5.67823	2.48732	4.62354	2.36261	5.62344	2.27015	-1.05468	2.00284	-0.0547886	0.121745	0.999894	1.76576
1531	AVEN	Cell death regulator Aven	Q9NQS1	Q9NQS1		7	7	7	26	26	26	38.506	0	36.46	144500000	21	27	16.8955	17.2865	18.3596	18.1534	18.886	19.0966	18.9003	19.0782	19.4163	18.9274	18.2503	18.6894	1.19812	1.02509	1.61776	1.2718	1.1085	0.954741	0.41964	0.54645	-0.0896168	0.0910337	-0.509257	0.936906
1533	EXOSC3	Exosome complex component RRP40	Q9NQT5	Q9NQT5		8	8	8	39.3	39.3	39.3	29.572	0	104.36	346720000	14	75	17.5819	16.216	17.1011	21.1403	21.1548	21.3644	20.6314	20.8468	20.6055	20.5753	20.8917	21.5736	4.25352	2.14128	3.72823	2.02977	4.04722	2.75519	-0.52529	2.11816	-0.206299	0.25188	0.318991	0.405363
1537	DDX21	Nucleolar RNA helicase 2	Q9NR30	Q9NR30	DEAD;GUCT;Helicase_C	28	28	26	33.6	33.6	30.1	87.343	0	228.67	1197000000	40	175	16.7897	17.9367	15.4275	20.7428	21.0423	20.4629	21.7052	21.6398	21.4169	20.5177	20.241	19.7527	4.03137	1.58656	4.86933	1.69404	3.45248	1.49102	0.837961	1.67734	-0.578886	0.949093	-1.41685	1.84134
1544	PNO1	RNA-binding protein PNO1	Q9NRX1	Q9NRX1	KH_1	4	4	4	19	19	19	27.924	0	38.194	97956000	14	26	16.8297	16.9548	16.7841	19.315	19.2229	19.4875	15.903	19.0263	18.7464	18.9983	19.0032	18.4669	2.48562	4.40635	1.03567	0.389021	1.96661	2.29562	-1.44995	0.548246	-0.519011	1.07895	0.930936	0.34653
1546	FARSB	Phenylalanine--tRNA ligase beta subunit	Q9NSD9	Q9NSD9	B3_4;B5	14	14	14	22.8	22.8	22.8	66.115	0	61.624	654960000	34	71	16.0324	16.3804	16.6284	22.2808	22.0796	21.7294	15.9802	17.2243	14.8806	23.0383	22.7093	22.8323	5.68288	4.73343	0	NaN	6.51291	4.35282	-6.00156	2.02608	0.830029	1.74598	6.83159	2.06336
1548	PDS5B	Sister chromatid cohesion protein PDS5 homolog B	Q9NTI5	Q9NTI5		12	12	11	8.7	8.7	8.2	164.67	0	28.188	83663000	74	21	17.5419	16.5905	16.9113	19.0229	18.5719	19.3277	15.1073	16.2011	15.2822	18.4891	18.9931	18.2563	1.95956	2.20892	0	NaN	1.5649	1.88196	-3.44396	2.69662	-0.394662	0.567642	3.04929	2.51796
1549	SMC4	Structural maintenance of chromosomes protein 4	Q9NTJ3	Q9NTJ3	SMC_hinge;SMC_N	19	19	19	15.6	15.6	15.6	147.18	0	69.226	339800000	71	70	17.002	16.3244	17.5463	20.2871	19.8165	20.1795	16.9905	19.2321	19.5197	20.1921	20.4125	19.9167	3.13684	2.22253	1.62324	0.773419	3.21619	2.25423	-1.51359	0.708334	0.0793514	0.145958	1.59295	0.742006
1551	MDN1	Midasin	Q9NU22	Q9NU22	AAA_5	10	10	10	2.1	2.1	2.1	632.81	0	28.621	465140000	282	28	16.9227	16.3637	15.6266	20.6641	21.6035	15.9919	16.9182	21.0738	21.6042	23.1254	24.816	22.8791	3.11552	0.676661	3.56106	0.883629	7.30247	2.89941	0.445539	0.0680729	4.18695	0.90157	3.74141	0.947451
1552	ZCCHC3	Zinc finger CCHC domain-containing protein 3	Q9NUD5	Q9NUD5	zf-CCHC	4	4	4	10.1	10.1	10.1	43.618	0	34.138	208370000	25	29	17.4246	15.9187	16.6887	20.6018	20.0552	15.5146	20.8214	20.7382	21.3527	20.6262	20.2142	19.7534	2.04654	0.479584	4.29341	2.39906	3.5206	2.32045	2.24688	0.526565	1.47407	0.339248	-0.77281	1.11989
1553	STAU2	Double-stranded RNA-binding protein Staufen homolog 2	Q9NUL3	Q9NUL3	dsrm	7	6	6	13.9	12.6	12.6	62.608	0	39.63	134410000	33	35	17.162	14.8793	17.359	19.3161	19.2456	19.0579	19.9122	18.9022	18.3895	19.5031	19.058	19.009	2.73974	1.1327	2.60122	1.21099	2.72327	1.1507	-0.138525	0.103686	-0.0164712	0.0309844	0.122054	0.0879719
1555	SPATS2L	SPATS2-like protein	Q9NUQ6	Q9NUQ6	DUF1387	8	8	8	18.3	18.3	18.3	61.728	0	48.774	278090000	32	51	16.9018	16.9384	15.7027	19.8771	20.0807	19.7625	20.5826	20.1871	20.1707	20.0714	20.2216	19.4047	3.39249	1.96234	3.7992	2.18637	3.38496	2.39448	0.406713	1.12096	-0.00753085	0.00894168	-0.414244	0.619554
1560	DDX18	ATP-dependent RNA helicase DDX18	Q9NVP1	Q9NVP1	DEAD;DUF4217;Helicase_C	10	10	10	19.9	19.9	19.9	75.406	0	50.925	315410000	34	71	17.0267	15.7837	15.7031	20.6823	20.7979	20.15	21.266	21.1896	21.0481	20.5646	20.4083	20.2071	4.37225	2.4716	4.99675	2.19799	4.22217	2.13021	0.624503	1.11297	-0.150079	0.258075	-0.774583	2.24583
1562	SDAD1	Protein SDA1 homolog	Q9NVU7	Q9NVU7	NUC130_3NT;SDA1	2	2	2	2.8	2.8	2.8	79.87	0	7.4497	80927000	35	10	17.9913	15.6277	16.02	19.2653	18.8287	18.4546	16.9446	19.5366	15.6313	18.4892	17.446	17.8599	2.30323	1.11834	0.824493	0.234577	1.38535	0.721883	-1.47874	0.487385	-0.917875	1.10313	0.560861	0.168796
1563	MTPAP	Poly(A) RNA polymerase, mitochondrial	Q9NVV4	Q9NVV4	PAP_assoc	7	7	7	11.5	11.5	11.5	66.171	0	19.47	184420000	31	44	16.2888	15.6569	16.3425	19.8119	19.9893	19.3491	17.752	19.3916	18.7778	19.8981	19.9346	19.513	3.62072	3.56778	2.54443	1.70793	3.68587	3.36576	-1.0763	0.851472	0.0651442	0.0992521	1.14144	0.882675
1565	RBM28	RNA-binding protein 28	Q9NW13	Q9NW13	RRM_1	14	14	14	19	19	19	85.737	0	59.649	375180000	37	62	15.0787	16.9572	16.7301	20.2402	20.5366	21.2533	16.608	20.623	20.5063	20.4729	20.6309	19.8429	4.42135	2.14643	2.99043	0.860519	4.06022	1.94295	-1.43091	0.406544	-0.361126	0.3937	1.06979	0.297435
1566	SLTM	SAFB-like transcription modulator	Q9NWH9	Q9NWH9	RRM_1;SAP	12	12	12	13.2	13.2	13.2	117.15	0	108.53	124970000	42	40	16.6848	15.4221	16.8846	18.5757	18.771	18.9773	19.9208	18.8942	18.5724	19.3949	19.2406	18.6129	2.44417	1.56372	2.79862	1.97486	2.7523	1.89457	0.354446	0.319432	0.308128	0.477495	-0.0463181	0.0326626
1574	LYAR	Cell growth-regulating nucleolar protein	Q9NX58	Q9NX58	zf-LYAR	15	15	15	39.3	39.3	39.3	43.614	0	174.22	566500000	17	103	16.7413	17.3184	15.5914	21.3097	20.9264	21.2989	21.7228	21.19	21.1378	20.114	20.6455	19.9926	4.62801	2.06317	4.79986	2.24541	3.70037	1.9971	0.17185	0.306374	-0.927644	1.62102	-1.09949	1.7922
1576	MIOS	WD repeat-containing protein mio	Q9NXC5	Q9NXC5		11	11	11	14.7	14.7	14.7	98.583	0	47.454	184610000	54	33	17.6247	15.6424	16.166	19.9963	19.8783	19.2604	19.1804	19.6388	19.2447	19.1383	19.0869	18.9719	3.23396	1.67868	2.87694	1.46958	2.58797	1.32026	-0.357021	0.571895	-0.645989	1.00268	-0.288968	0.764143
1577	TEX10	Testis-expressed sequence 10 protein	Q9NXF1	Q9NXF1	Ipi1_N	6	6	6	7.8	7.8	7.8	105.67	0	20.885	111170000	44	25	16.5489	15.9409	15.6704	19.4692	19.3557	18.9783	16.3542	19.316	19.0423	18.743	19.5604	18.6524	3.21433	2.87831	2.18409	0.857375	2.93182	2.76337	-1.03024	0.409416	-0.282509	0.348263	0.747733	0.286306
1582	DDX56	Probable ATP-dependent RNA helicase DDX56	Q9NY93	Q9NY93	DEAD;Helicase_C	4	4	4	8.2	8.2	8.2	61.589	0	26.908	71977000	30	19	16.5439	16.696	16.0261	18.7279	18.6466	18.1096	16.7769	18.7483	18.1568	18.634	18.2692	17.9099	2.0727	2.74373	1.472	0.936191	1.849	2.50005	-0.600706	0.381169	-0.2237	0.321618	0.377006	0.226237
1584	ZAK	Mitogen-activated protein kinase kinase kinase MLT	Q9NYL2	Q9NYL2	Pkinase_Tyr;SAM_1	7	7	7	11.1	11.1	11.1	91.154	0	26.628	69065000	42	25	16.2766	17.4035	15.1506	16.0184	15.6996	18.0637	18.0217	18.6633	18.7351	18.3363	19.1832	17.7346	0.316984	0.11684	2.19644	1.18979	2.14114	1.2202	1.87946	0.934576	1.82415	0.9324	-0.0553055	0.0386075
1587	FAM120A	Constitutive coactivator of PPAR-gamma-like protein 1	Q9NZB2	Q9NZB2;Q5T035		21	21	20	24.7	24.7	24	121.89	0	317.64	867800000	57	141	16.5892	16.2025	15.937	21.4555	21.4263	20.9748	20.801	21.1174	21.134	21.6908	21.1321	21.5623	5.04267	4.35882	4.7746	3.85179	5.21885	4.43807	-0.268071	0.622701	0.176178	0.31326	0.444249	0.987044
1588	IGF2BP1	Insulin-like growth factor 2 mRNA-binding protein 1	Q9NZI8	Q9NZI8;Q15517;REV__Q15833	KH_1;RRM_1	20	20	18	34.1	34.1	30.2	63.48	0	323.31	4386900000	30	257	15.9912	17.0717	16.2745	24.5429	24.6676	23.8722	19.5908	20.7601	20.9195	24.8906	24.7088	24.8768	7.91512	4.16948	3.97769	2.66987	8.3796	2.9593	-3.93744	2.53012	0.464474	0.70801	4.40191	2.09787
1590	GLTSCR2	Glioma tumor suppressor candidate region gene 2 protein	Q9NZM5	Q9NZM5	Nop53	3	3	3	6.3	6.3	6.3	54.389	0	9.1742	46068000	15	13	16.1615	15.7444	17.2659	17.5489	17.2476	17.0581	16.6327	19.1411	19.0161	17.8236	17.9306	17.7646	0.89424	0.745392	1.87269	0.870253	1.44901	1.07537	0.978448	0.452191	0.554773	1.31519	-0.423674	0.18335
1592	CALML5	Calmodulin-like protein 5	Q9NZT1	Q9NZT1	EF-hand_7	3	3	3	15.1	15.1	15.1	15.892	0	12.592	37458000	9	16	21.1616	21.5516	20.9629	16.6383	16.7599	16.5122	15.2529	16.9151	16.5866	17.3147	16.0762	16.4749	-4.58855	3.48846	-4.97384	2.24387	-4.60344	2.74035	0	NaN	0	NaN	0	NaN
1597	ZKSCAN7	Zinc finger protein with KRAB and SCAN domains 7	Q9P0L1	Q9P0L1	KRAB;SCAN	1	1	1	1.7	1.7	1.7	85.032	0.0057034	2.8882	251960000	38	31	16.6589	16.1104	16.3866	20.6253	19.4837	16.8772	21.3723	20.5682	22.0544	19.2675	15.0495	20.916	2.6101	0.853108	4.94631	2.45848	2.0257	0.436713	2.33621	0.799207	-0.584408	0.100172	-2.92061	0.633499
1602	IBTK	Inhibitor of Bruton tyrosine kinase	Q9P2D0	Q9P2D0	Ank_2;BTB;RCC1	7	7	7	5.2	5.2	5.2	150.53	0	15.818	71297000	70	13	16.2758	16.718	16.0844	15.8035	18.2954	17.3452	18.7799	19.0113	18.8951	16.8756	18.2708	18.1279	0.78863	0.406662	2.53602	2.61041	1.39866	1.14994	1.74739	0.864262	0.61003	0.283483	-1.13736	0.916832
1604	RRBP1	Ribosome-binding protein 1	Q9P2E9	Q9P2E9	Rib_recp_KP_reg	19	19	19	16	16	16	152.45	0	103.73	175380000	95	77	15.0637	15.7928	16.3468	18.9673	18.4175	18.4403	16.8139	17.1354	16.8137	20.0254	20.1062	19.5324	2.87393	2.16244	1.18656	1.12055	4.15359	2.60801	-1.68737	2.53726	1.27966	2.13836	2.96703	3.32253
1606	LARS	Leucine--tRNA ligase, cytoplasmic	Q9P2J5	Q9P2J5	Anticodon_1;tRNA-synt_1	16	16	16	15	15	15	134.46	0	53.694	235860000	62	86	15.4228	16.2576	17.2941	18.9286	19.1466	16.5937	18.7908	19.3515	19.5347	19.208	19.5865	19.8476	1.89811	0.867764	2.90082	1.68217	3.22253	1.73529	1.00271	0.462827	1.32442	0.61397	0.32171	0.478087
1608	RBM27	RNA-binding protein 27	Q9P2N5;U3KPZ7	Q9P2N5;U3KPZ7;Q5T8P6	PWI;zf-CCCH	5	5	5	5.5	5.5	5.5	118.72	0	17.925	52689000	39	12	15.9782	16.2544	16.9428	18.5338	18.2675	17.587	16.7373	18.0916	15.9492	18.9381	18.7232	18.9965	1.7376	1.90496	0.534216	0.302988	2.49413	2.06195	-1.20339	0.732934	0.756524	0.977252	1.95991	1.06512
1614	EIF3K	Eukaryotic translation initiation factor 3 subunit K	Q9UBQ5	Q9UBQ5		6	6	6	27.5	27.5	27.5	25.059	0	59.316	891130000	11	119	16.2379	17.1069	15.9298	21.392	21.3407	21.4349	22.1476	22.202	22.2798	21.6898	20.8324	21.6872	4.96438	2.31895	5.78495	2.47179	4.97829	3.31007	0.820571	3.88663	0.0139109	0.0151874	-0.80666	0.986617
1616	NXF1	Nuclear RNA export factor 1	Q9UBU9	Q9UBU9	LRR_1;NTF2;TAP_C;Tap-RNA_bind	8	8	8	14.2	14.2	14.2	70.182	0	34.188	129510000	31	48	16.5858	16.917	17.1126	18.4404	18.4903	17.886	15.876	18.8112	18.4508	19.1812	19.2381	19.1169	1.4004	2.25443	0.84087	0.337369	2.30689	2.5137	-0.559527	0.215193	0.906495	1.40876	1.46602	0.596086
1625	SRP68	Signal recognition particle subunit SRP68	Q9UHB9	Q9UHB9		16	16	16	25	25	25	70.729	0	86.883	644020000	34	109	15.8548	16.3861	16.8028	20.7774	20.4413	20.0414	20.937	20.3358	20.4519	20.3913	20.3483	20.2389	4.07214	3.37586	4.22702	3.33506	3.97826	2.40924	0.154888	0.213364	-0.0938714	0.151808	-0.248759	0.511743
1626	MKRN1;MKRN4P	E3 ubiquitin-protein ligase makorin-1;Putative E3 ubiquitin-protein ligase makorin-4	Q9UHC7;Q13434	Q9UHC7;Q13434	zf-C3HC4;zf-CCCH;zf-RING_2	2	2	2	5.8	5.8	5.8	53.349	0	12.585	21435000	18	12	16.7141	16.2227	15.768	18.498	18.6095	18.8286	17.32	16.0549	16.0937	15.1274	17.0179	16.1741	2.41045	2.15496	0	NaN	0	NaN	-2.15585	1.5262	-2.53892	1.40055	0	NaN
1631	DDX20	Probable ATP-dependent RNA helicase DDX20	Q9UHI6	Q9UHI6	DEAD;Helicase_C	5	5	5	7.3	7.3	7.3	92.239	0	23.605	105000000	42	41	16.4858	17.0858	16.968	19.4215	19.1639	18.2991	18.1553	17.3814	15.1709	19.5537	19.7086	19.3133	2.11491	1.95189	0.0559362	0.0193955	2.67863	3.19191	-2.05897	0.867876	0.563724	0.632051	2.62269	1.01369
1634	PUF60	Poly(U)-binding-splicing factor PUF60	Q9UHX1	Q9UHX1	RRM_1	5	5	5	8.9	8.9	8.9	59.875	0	19.23	47852000	25	21	16.7732	16.089	16.8892	19.1568	16.774	18.8361	16.9645	17.5322	17.6885	18.2556	19.2149	18.595	1.67183	0.841112	0.81126	1.14056	2.1047	2.28442	-0.860571	0.432602	0.43287	0.199931	1.29344	1.61133
1637	HERC5	E3 ISG15--protein ligase HERC5	Q9UII4	Q9UII4	HECT;RCC1	11	11	11	10.7	10.7	10.7	116.85	0	37.795	134750000	54	35	16.8612	17.5671	17.5538	19.2755	19.4237	18.6368	16.2393	18.5378	18.5118	18.5163	18.5321	17.766	1.78465	2.21936	0.435637	0.199505	0.944082	1.28418	-1.34902	0.672899	-0.840571	1.13017	0.508445	0.235928
1638	TRMT6	tRNA (adenine(58)-N(1))-methyltransferase non-catalytic subunit TRM6	Q9UJA5	Q9UJA5	Gcd10p	11	11	11	21.7	21.7	21.7	55.799	0	126.54	870770000	29	117	16.992	16.2321	16.8417	22.258	22.139	21.9287	14.9655	14.9464	15.1334	22.1445	22.4543	22.0912	5.41997	3.34189	-1.67351	1.84583	5.54143	3.55809	-7.09348	5.50756	0.121459	0.336524	7.21494	4.94478
1639	DDX41	Probable ATP-dependent RNA helicase DDX41	Q9UJV9	Q9UJV9	DEAD;Helicase_C	9	9	9	16.6	16.6	16.6	69.837	0	24.78	87790000	42	37	16.2671	15.3504	16.5821	18.4259	17.3697	16.181	18.6312	18.2419	18.6858	18.4141	18.2047	18.0009	1.25901	0.732517	2.45313	1.87996	2.14003	1.69141	1.19412	0.692923	0.881012	0.51423	-0.313107	0.781601
1645	FBXW11;BTRC	F-box/WD repeat-containing protein 11;F-box/WD repeat-containing protein 1A	Q9UKB1;Q9Y297	Q9UKB1;Q9Y297	Beta-TrCP_D;F-box-like;WD40	5	5	5	10	10	10	62.09	0	13.17	71246000	32	13	16.3992	16.5691	15.6402	18.9484	18.6505	18.5089	17.4541	18.0556	17.4351	18.9322	18.8265	19.0575	2.49977	2.27308	1.44543	1.74662	2.73589	2.09525	-1.05434	1.76474	0.236119	0.690816	1.29046	1.78427
1646	MRTO4	mRNA turnover protein 4 homolog	Q9UKD2	Q9UKD2	Ribosomal_L10	6	6	6	28	28	28	27.56	0	19.89	95697000	15	30	15.0134	17.5647	16.5049	19.1094	16.425	16.7166	19.2206	18.8044	18.7632	19.482	18.825	18.4627	1.05595	0.394835	2.56839	1.16228	2.56219	1.23199	1.51244	0.668203	1.50624	0.674217	-0.00620079	0.0059854
1648	GTF3C4	General transcription factor 3C polypeptide 4	Q9UKN8	Q9UKN8	TFIIIC_delta;zf-TFIIIC	10	10	10	15	15	15	91.981	0	32.577	69586000	55	21	17.2377	17.3128	16.7869	16.5109	17.382	17.3885	16.2264	17.6924	18.3781	19.0459	18.8178	18.2268	0	NaN	0.319805	0.1747	1.58431	2.07996	0.33847	0.17837	1.60297	1.84143	1.2645	0.757728
1651	AGO2	Protein argonaute-2	Q9UKV8	Q9UKV8	DUF1785;PAZ;Piwi	17	17	12	22.5	22.5	16.3	97.207	0	66.645	284780000	51	103	16.363	16.2091	16.8505	19.7108	19.7016	20.045	18.2706	19.0883	19.0659	19.7713	19.8497	19.5048	3.34494	3.35905	2.33406	2.51611	3.2344	3.22512	-1.01088	1.31859	-0.110536	0.290473	0.900339	1.19509
1653	AGO1	Protein argonaute-1	Q9UL18	Q9UL18	DUF1785;PAZ;Piwi	10	5	3	13.4	7.2	4.6	97.213	0	16.563	43390000	47	16	16.4442	16.1632	16.0907	16.3478	15.6898	15.7839	16.5442	18.758	15.1521	19.0085	18.6163	18.5097	0	NaN	0.585361	0.197992	2.47876	3.4728	0.877565	0.307233	2.77097	3.20013	1.8934	0.67543
1662	PRPF19	Pre-mRNA-processing factor 19	Q9UMS4	Q9UMS4	Prp19;U-box;WD40	10	10	10	22.2	22.2	22.2	55.18	0	74.706	1345300000	19	126	16.1892	16.7642	16.7514	22.2359	22.1569	21.6796	22.2107	22.2616	22.2718	22.0823	21.7234	21.9239	5.45588	4.50915	5.67977	2.9969	5.34163	3.93836	0.223886	0.4866	-0.114256	0.21546	-0.338142	1.10633
1664	L1RE1	LINE-1 retrotransposable element ORF1 protein	Q9UN81	Q9UN81	Transposase_22	8	8	8	27.2	27.2	27.2	40.055	0	56.005	318400000	16	58	17.7397	17.1146	15.9516	19.747	19.716	19.569	20.7681	20.4713	20.4239	19.624	19.1986	19.1503	2.74207	1.47611	3.61915	1.76762	2.38902	1.43836	0.877082	2.25417	-0.353052	0.880995	-1.23013	2.42597
1665	G3BP2	Ras GTPase-activating protein-binding protein 2	Q9UN86	Q9UN86	NTF2;RRM_1	10	8	8	24.5	22	22	54.12	0	83.146	2260400000	22	61	15.5461	16.4623	17.0685	21.8747	22.5855	23.5036	19.637	23.5886	22.755	25.4882	26.5795	24.7678	6.29567	3.19685	5.63459	1.51231	9.2529	3.67556	-0.661076	0.187727	2.95723	1.84679	3.61831	1.10843
1671	DIMT1	Probable dimethyladenosine transferase	Q9UNQ2	Q9UNQ2	RrnaAD	7	7	7	20.1	20.1	20.1	35.236	0	33.605	228900000	18	57	16.812	16.3047	16.4966	19.5083	19.3459	18.7328	19.6911	19.9251	19.8626	19.0041	19.1382	19.4121	2.65787	2.82151	3.28847	3.43466	2.647	3.6971	0.630594	0.973626	-0.0108687	0.0132846	-0.641462	1.78594
1674	WDR3	WD repeat-containing protein 3	Q9UNX4	Q9UNX4	Utp12;WD40	4	4	4	4.9	4.9	4.9	106.1	0	10.591	98104000	48	20	14.8836	17.2514	17.8682	19.4195	18.7828	18.7605	15.8515	19.2535	19.2248	19.8044	20.0255	19.5196	2.31989	0.925983	1.44222	0.421828	3.11546	1.14159	-0.877668	0.2838	0.79557	1.34593	1.67324	0.559672
1676	TNRC6B	Trinucleotide repeat-containing gene 6B protein	Q9UPQ9	Q9UPQ9	Ago_hook	12	12	12	7.6	7.6	7.6	194	0	46.513	102730000	80	28	17.4773	15.86	16.4547	17.9966	17.7186	18.2411	18.7433	18.3226	18.2094	18.2451	18.4762	18.5819	1.38812	1.05858	1.82779	1.31402	1.83708	1.26201	0.439678	0.925203	0.448963	1.10948	0.00928497	0.0159641
1679	SRRM2	Serine/arginine repetitive matrix protein 2	Q9UQ35	Q9UQ35	cwf21	14	14	14	7.2	7.2	7.2	299.61	0	43.303	149030000	120	47	15.4998	16.5393	15.1597	18.5235	18.7326	15.737	19.8875	18.8476	18.4891	19.0609	18.538	18.3794	1.93144	0.761975	3.3418	2.31958	2.92653	2.0649	1.41036	0.55134	0.995089	0.385136	-0.415271	0.355217
1680	PA2G4	Proliferation-associated protein 2G4	Q9UQ80	Q9UQ80;H0YIN7	Peptidase_M24	16	16	16	44.4	44.4	44.4	43.786	0	323.31	6304300000	22	325	15.2103	18.2711	15.9721	24.9506	24.9601	24.9598	20.0816	21.0818	21.1479	24.6871	24.7852	24.2752	8.47234	1.93609	4.28596	1.51094	8.09802	1.96106	-4.18638	2.1728	-0.374326	0.857655	3.81205	2.54691
1681	SMC3	Structural maintenance of chromosomes protein 3	Q9UQE7	Q9UQE7	SMC_hinge;SMC_N	33	33	33	27.3	27.3	27.3	141.54	0	173.1	769110000	65	150	16.7643	17.9868	16.5976	21.0537	21.2167	21.246	17.0795	18.9583	19.2777	21.7371	21.4149	21.1702	4.05592	1.98388	1.32229	0.716981	4.32454	2.30129	-2.73363	1.24775	0.268618	0.622878	3.00225	1.3768
1682	C14orf166	UPF0568 protein C14orf166	Q9Y224	Q9Y224	RLL	8	8	8	34	34	34	28.068	0	33.125	387040000	16	62	15.9308	15.7225	16.244	21.192	21.2753	21.1563	21.5461	21.203	21.3907	20.3051	20.061	20.396	5.24207	3.32093	5.41414	4.56109	4.28827	4.2252	0.172068	0.660502	-0.953803	2.23323	-1.12587	2.87659
1683	RUVBL2	RuvB-like 2	Q9Y230	Q9Y230	TIP49	17	17	17	31.5	31.5	31.5	51.156	0	103.75	956340000	27	139	16.2281	16.9717	15.689	21.6473	21.257	21.5272	20.9257	21.1902	21.3695	21.4959	21.4815	21.1549	5.1809	2.56475	4.86557	2.55941	5.08118	2.52739	-0.315329	0.843585	-0.0997181	0.245763	0.215611	0.559634
1685	EIF3L	Eukaryotic translation initiation factor 3 subunit L	Q9Y262	Q9Y262	Paf67	20	20	20	35.5	35.5	35.5	66.726	0	323.31	3145900000	29	289	14.9281	16.1548	16.5456	22.9362	22.9251	23.2936	23.5536	23.3778	23.2706	22.8079	22.4804	22.9297	7.17552	2.52435	7.52451	2.47033	6.8632	2.52043	0.348989	1.07364	-0.312321	0.796763	-0.661311	1.69709
1686	RUVBL1	RuvB-like 1	Q9Y265	Q9Y265	TIP49	10	10	10	23.9	23.9	23.9	50.227	0	60.522	466790000	22	87	16.1165	15.8266	16.9554	20.6787	20.3571	20.5379	20.1908	20.2789	20.5522	20.8484	20.2518	20.6051	4.22508	2.40073	4.04112	2.42368	4.2689	2.80662	-0.183967	0.568964	0.0438156	0.0769216	0.227783	0.470328
1688	FARSA	Phenylalanine--tRNA ligase alpha subunit	Q9Y285	Q9Y285	tRNA-synt_2d	9	9	9	16.1	16.1	16.1	57.563	0	65.655	383600000	23	72	16.665	17.1288	15.9134	20.4114	20.7052	20.5208	16.2907	16.97	17.2274	21.3572	20.8079	21.4555	3.97673	2.25543	0.26028	0.224444	4.63782	2.95133	-3.71645	2.51168	0.66109	1.18738	4.37754	3.41848
1689	DRG1	Developmentally-regulated GTP-binding protein 1	Q9Y295	Q9Y295	MMR_HSR1;TGS	9	9	9	28.1	28.1	28.1	40.542	0	68.374	186320000	23	46	17.0557	15.9071	15.2466	20.249	20.1751	20.0925	15.8521	15.6195	18.6722	20.4581	19.7831	20.4395	4.10239	1.80543	0.644779	0.219982	4.15711	2.109	-3.45761	1.1449	0.0547123	0.0808637	3.51233	1.19722
1691	DIS3	Exosome complex exonuclease RRP44	Q9Y2L1	Q9Y2L1	PIN_4	5	5	5	7	7	7	109	0	19.468	56242000	48	19	16.9065	16.559	15.6985	17.4521	17.3624	15.8478	18.5422	17.9496	18.3659	17.9268	18.2291	18.2654	0.499446	0.319708	1.89795	1.72023	1.75243	1.5088	1.39851	0.987228	1.25299	0.877684	-0.145521	0.278863
1694	DDX52	Probable ATP-dependent RNA helicase DDX52	Q9Y2R4	Q9Y2R4	DEAD;Helicase_C	4	4	4	8.3	8.3	8.3	67.497	0	13.197	58820000	28	10	15.6118	16.0404	16.7984	17.1567	17.4878	16.2414	16.4833	19.0812	18.8534	18.7566	18.9252	18.8614	0	NaN	1.98911	0.903609	2.69749	1.83252	1.17734	0.532969	1.88572	1.45613	0.708383	0.315416
1698	NOP58	Nucleolar protein 58	Q9Y2X3	Q9Y2X3	Nop;NOP5NT;NOSIC	9	9	9	20.4	20.4	20.4	59.578	0	64.851	214490000	24	45	16.6788	16.1909	15.5538	19.1931	19.5486	16.7548	20.2349	19.4993	19.1165	19.5269	19.3811	19.049	2.35768	0.993224	3.47577	2.77561	3.17788	2.3728	1.11809	0.478705	0.820198	0.347162	-0.297888	0.326636
1705	LUC7L2	Putative RNA-binding protein Luc7-like 2	Q9Y383	Q9Y383	LUC7	8	8	6	21.4	21.4	15.8	46.513	0	142	1195700000	18	89	16.6856	16.1372	15.5106	21.0929	21.7755	21.544	22.7079	23.3496	23.3112	21.6985	21.5034	21.1449	5.35967	3.24401	7.01178	3.66395	5.33781	3.01829	1.65211	2.3341	-0.0218614	0.0284165	-1.67397	2.41828
1708	EXOSC1	Exosome complex component CSL4	Q9Y3B2	Q9Y3B2	ECR1_N;EXOSC1	7	7	7	43.1	43.1	43.1	21.452	0	51.008	360370000	9	67	16.8003	16.1052	16.3909	20.4266	20.5695	20.566	20.494	20.0697	19.9324	20.6366	20.3634	20.7848	4.08859	2.80896	3.73328	3.76116	4.16282	3.66215	-0.355308	0.7882	0.0742289	0.208011	0.429537	0.935977
1712	NOP16	Nucleolar protein 16	Q9Y3C1	Q9Y3C1	Nop16	7	7	7	34.3	34.3	34.3	21.188	0	27.866	424190000	10	79	16.8192	16.634	16.1286	19.9515	20.0662	19.3644	20.1357	20.3076	19.8622	20.5377	20.4805	19.8255	3.26674	3.38928	3.57457	3.44161	3.75397	3.56009	0.307831	0.516472	0.487225	0.704711	0.179393	0.266567
1717	STRAP	Serine-threonine kinase receptor-associated protein	Q9Y3F4	Q9Y3F4	WD40	11	11	11	35.7	35.7	35.7	38.438	0	64.249	220330000	21	63	16.2008	14.6078	16.8412	20.1593	19.7077	19.9376	18.8535	16.2586	19.4207	19.6913	20.0126	20.0076	4.05159	1.64965	2.29435	0.876968	4.02058	1.62279	-1.75724	0.675563	-0.0310084	0.0639604	1.72623	0.663485
1718	RTCB	tRNA-splicing ligase RtcB homolog	Q9Y3I0	Q9Y3I0	RtcB	18	18	18	34.7	34.7	34.7	55.21	0	244.51	4432400000	24	276	17.1559	19.0987	17.0653	23.0516	22.9352	22.7769	24.1125	24.196	24.196	22.6256	22.3417	22.6541	5.14792	1.81971	6.39486	1.97949	4.76717	1.76817	1.24694	2.75633	-0.380742	1.36545	-1.62768	2.67296
1720	RPL36	60S ribosomal protein L36	Q9Y3U8	Q9Y3U8	Ribosomal_L36e	3	3	3	28.6	28.6	28.6	12.254	0	37.419	8021200000	3	161	17.3188	16.2345	16.0483	25.3284	25.4692	24.7553	25.8964	25.9078	25.9696	25.8794	25.3226	25.1368	8.65046	3.60502	9.39074	2.76382	8.9124	3.67413	0.740285	1.12194	0.261944	0.348123	-0.478341	0.785296
1722	CHTOP	Chromatin target of PRMT1 protein	Q9Y3Y2	Q9Y3Y2	FoP_duplication	3	3	3	16.9	16.9	16.9	26.396	0	34.729	83229000	9	12	16.6251	16.1236	17.3896	19.1921	19.4364	15.7301	17.7058	16.0231	19.421	19.307	19.0454	18.9594	1.40676	0.44144	1.00386	0.377058	2.39118	1.77127	-0.402893	0.0926398	0.984426	0.303182	1.38732	0.534174
1733	TBL2	Transducin beta-like protein 2	Q9Y4P3	Q9Y4P3	WD40	6	6	6	16.1	16.1	16.1	49.797	0	22.856	67836000	26	17	15.1807	15.6027	16.275	19.0128	15.1469	15.8978	17.5867	19.1967	17.9697	19.4803	19.4557	19.2283	0.999679	0.309022	2.56489	1.79646	3.70197	2.29992	1.56521	0.496835	2.7023	0.826096	1.13708	0.852135
1734	LAS1L	Ribosomal biogenesis protein LAS1L	Q9Y4W2	Q9Y4W2	Las1	9	9	9	17.2	17.2	17.2	83.064	0	46.261	119060000	40	35	16.6024	15.3814	17.318	18.873	18.786	14.7335	19.3094	18.8973	18.6203	18.4796	18.9332	18.5114	1.03026	0.266308	2.50841	1.45024	2.20748	1.28426	1.47815	0.406362	1.17722	0.318836	-0.300928	0.526935
1736	PRRC2C	Protein PRRC2C	Q9Y520	Q9Y520	BAT2_N	57	57	55	20.3	20.3	19.6	316.91	0	323.31	2678200000	104	406	16.5599	15.6952	15.679	21.7901	21.7898	21.686	22.5437	22.0472	21.8962	21.8155	21.8682	21.3433	5.77728	2.64843	6.18434	3.81885	5.69765	3.50765	0.407069	0.771144	-0.0796223	0.165524	-0.486691	0.875936
1737	YTHDF2	YTH domain-containing family protein 2	Q9Y5A9	Q9Y5A9	YTH	8	8	4	15.4	15.4	9.2	62.333	0	40.579	254570000	20	38	16.3679	17.3998	16.2994	19.8435	20.1257	20.9484	20.4981	19.0427	19.2143	20.952	21.3284	20.9415	3.61681	2.74929	2.896	2.05295	4.38492	2.5132	-0.720802	0.555404	0.768109	0.873406	1.48891	1.1299
1738	SUPT16H	FACT complex subunit SPT16	Q9Y5B9	Q9Y5B9	FACT-Spt16_Nlob;Peptidase_M24;Rtt106;SPT16	30	30	30	27.3	27.3	27.3	119.91	0	174.54	967780000	54	204	15.8133	17.0965	16.3499	21.2396	21.2418	20.8638	19.8644	19.6894	19.7065	21.0704	20.8567	21.1841	4.69517	2.50645	3.33353	1.9629	4.61719	2.37159	-1.36164	2.50893	-0.0779775	0.1875	1.28366	2.99869
1739	UTP18	U3 small nucleolar RNA-associated protein 18 homolog	Q9Y5J1	Q9Y5J1	Apc4_WD40	7	7	7	17.3	17.3	17.3	62.003	0	31.563	42418000	27	12	16.978	17.1346	16.4768	15.7177	17.2991	16.4623	16.6224	15.4545	19.9503	19.4696	19.3372	19.2245	0	NaN	0.479286	0.120798	2.48063	2.52807	0.849396	0.221217	2.85074	1.64675	2.00134	0.559961
1741	SRPRB	Signal recognition particle receptor subunit beta	Q9Y5M8	Q9Y5M8	SRPRB	5	5	5	25.1	25.1	25.1	29.702	0	43.719	134720000	16	27	17.1116	15.8823	16.193	19.3042	19.0764	16.0278	20.1962	19.721	19.1779	18.915	18.7521	19.1899	1.7405	0.627233	3.30273	2.58111	2.55673	1.89262	1.56223	0.561602	0.816233	0.283016	-0.745998	0.953876
1743	GTF3C3	General transcription factor 3C polypeptide 3	Q9Y5Q9	Q9Y5Q9	TPR_1;TPR_8	7	7	7	8.8	8.8	8.8	101.27	0	29.477	82808000	44	37	15.9193	17.2595	17.6741	18.8324	18.4244	16.4708	15.5773	18.5027	17.9672	19.1714	19.0059	18.8362	0.958276	0.452633	0.398115	0.138756	2.05355	1.24977	-0.560161	0.183921	1.09528	0.567556	1.65544	0.686508
1752	IGF2BP2	Insulin-like growth factor 2 mRNA-binding protein 2	Q9Y6M1	Q9Y6M1	KH_1;RRM_1	13	12	12	23	20.9	20.9	66.121	0	58.248	618610000	28	65	16.7749	17.7575	15.546	21.8836	21.5678	22.2333	16.4264	18.8188	19.2362	22.7014	22.3154	21.6295	5.20206	2.00708	1.46764	0.596261	5.5226	2.3027	-3.73442	1.34504	0.320539	0.354726	4.05495	1.49492
